# Supplementary material for: Statistical Analysis of Copper(I) Iodide and Bis(Diphenylphosphino)alkane-Based Complexes and Coordination Polymers
Source: MDPI journal article supplement (doi:10.3390/molecules28237781), 2023-11-25
Supplement: s1 [file s1]

**Statistical analysis of Copper(I) Iodide and Bis(diphenylphosphino)alkane-  
Based Complexes and Coordination Polymers**

Léo Boivin<sup>1</sup>, Adrien Schlachter<sup>2</sup>, Daniel Fortin<sup>1</sup>, Christophe Lescop<sup>2</sup> and Pierre D. Harvey<sup>1\*</sup>

<sup>1</sup>*Département de Chimie, Université de Sherbrooke, Sherbrooke, QC J1K 2R1, Canada*

<sup>2</sup>*ISCR (Institut des Sciences Chimiques de Rennes)—UMR 6226, CNRS, INSA Rennes, University Rennes, F-35000 Rennes, France*

**TABLE OF CONTENTS**

|                                                                                                                                                                                                                                                                                                                                   |    |
|-----------------------------------------------------------------------------------------------------------------------------------------------------------------------------------------------------------------------------------------------------------------------------------------------------------------------------------|----|
| <b>Figure S1.</b> PXRD pattern of <b>1(2:1)</b> , compared to the calculated pattern for the step-staircase motif as reported by references <sup>1,2</sup> .....                                                                                                                                                                  | 7  |
| <b>Figure S2.</b> PXRD pattern of <b>2(2:1)</b> , compared to the calculated pattern for the diamond motif as reported by this work. Large peaks at 25.7°, 42.4°, and 50.1° are due to the presence of excess copper(I) iodide .....                                                                                              | 7  |
| <b>Figure S3.</b> PXRD pattern of <b>3(2:1)</b> , compared to the calculated pattern for the eared cubane motif as reported by reference <sup>3</sup> . Large peaks at 25.7°, 42.4°, and 50.1° are due to the presence of excess copper(I) iodide .....                                                                           | 8  |
| <b>Figure S4.</b> PXRD pattern of <b>4(2:1)</b> , compared to the calculated pattern for the rhomboid motif as reported by references <sup>4,5</sup> . Large peaks at 25.7°, 42.4°, and 50.1° are due to the presence of excess copper(I) iodide .....                                                                            | 8  |
| <b>Figure S5.</b> PXRD pattern of <b>5(2:1)</b> , compared to the calculated pattern for the rhomboid motif as reported by references <sup>5,6</sup> . Due to the large halo, no conclusive structural determination can be made. Large peaks at 25.7°, 42.4°, and 50.1° are due to the presence of excess copper(I) iodide ..... | 9  |
| <b>Figure S6.</b> PXRD pattern of <b>6(2:1)</b> . Large peaks at 25.7°, 42.4°, and 50.1° are due to the presence of excess copper(I) iodide.....                                                                                                                                                                                  | 9  |
| <b>Figure S7.</b> PXRD pattern of <b>7(2:1)</b> . Large peaks at 25.7°, 42.4°, and 50.1° are due to the presence of excess copper(I) iodide.....                                                                                                                                                                                  | 10 |
| <b>Figure S8.</b> PXRD pattern of <b>8(2:1)</b> , compared to the calculated pattern for the cubane motif as reported by this work .....                                                                                                                                                                                          | 10 |
| <b>Figure S9.</b> PXRD pattern of <b>1(3:2)</b> , compared to the calculated pattern for the diamond motif as reported by reference <sup>7</sup> . Large peaks at 25.7°, 42.4°, and 50.1° are due to the presence of excess copper(I) iodide .....                                                                                | 11 |
| <b>Figure S10.</b> PXRD pattern of <b>2(3:2)</b> .....                                                                                                                                                                                                                                                                            | 11 |
| <b>Figure S11.</b> PXRD pattern of <b>3(3:2)</b> .....                                                                                                                                                                                                                                                                            | 12 |

|                                                                                                                                                                                                                                                                                                                                        |    |
|----------------------------------------------------------------------------------------------------------------------------------------------------------------------------------------------------------------------------------------------------------------------------------------------------------------------------------------|----|
| <b>Figure S12.</b> PXRD pattern of <b>4(3:2)</b> , compared to the calculated pattern for the rhomboid motif as reported by references <sup>4,5</sup> . Large peaks at 25.7°, 42.4°, and 50.1° are due to the presence of excess copper(I) iodide .....                                                                                | 12 |
| <b>Figure S13.</b> PXRD pattern of <b>5(3:2)</b> , compared to the calculated pattern for the rhomboid motif as reported by reference <sup>5,6</sup> . This sample is concluded to be a mix of the rhomboid motif and another unknown motif. Peaks at 25.7°, 42.4°, and 50.1° are due to the presence of excess copper(I) iodide. .... | 13 |
| <b>Figure S14.</b> PXRD pattern of <b>6(3:2)</b> compared to the calculated pattern for the rhomboid motif as reported by this work. This sample is concluded to be a mix of the rhomboid motif and another unknown motif.....                                                                                                         | 13 |
| <b>Figure S15.</b> PXRD pattern of <b>7(3:2)</b> .....                                                                                                                                                                                                                                                                                 | 14 |
| <b>Figure S16.</b> PXRD pattern of <b>8(3:2)</b> .....                                                                                                                                                                                                                                                                                 | 14 |
| <b>Figure S17.</b> PXRD pattern of <b>1(1:1)</b> , compared to the calculated pattern for the bipyramid motif as reported by this work.....                                                                                                                                                                                            | 15 |
| <b>Figure S18.</b> PXRD pattern for <b>2(1:1)</b> .....                                                                                                                                                                                                                                                                                | 15 |
| <b>Figure S19.</b> PXRD pattern of <b>3(1:1)</b> , compared to the calculated pattern for the rhomboid motif as reported by references <sup>6,8</sup> .....                                                                                                                                                                            | 16 |
| <b>Figure S20.</b> PXRD pattern of <b>4(1:1)</b> , compared to the calculated pattern for the rhomboid motif as reported by references <sup>4,5</sup> .....                                                                                                                                                                            | 16 |
| <b>Figure S21.</b> PXRD pattern of <b>5(1:1)</b> , compared to the calculated pattern for the rhomboid motif as reported by references <sup>5,6</sup> .....                                                                                                                                                                            | 17 |
| <b>Figure S22.</b> PXRD pattern of <b>6(1:1)</b> compared to the calculated pattern for the rhomboid motif as reported by this work .....                                                                                                                                                                                              | 17 |
| <b>Figure S23.</b> PXRD pattern of <b>7(1:1)</b> .....                                                                                                                                                                                                                                                                                 | 18 |
| <b>Figure S24.</b> PXRD pattern of <b>8(1:1)</b> .....                                                                                                                                                                                                                                                                                 | 18 |
| <b>Figure S25.</b> PXRD pattern of <b>1(2:3)</b> .....                                                                                                                                                                                                                                                                                 | 19 |
| <b>Figure S26.</b> PXRD pattern of <b>2(2:3)</b> , compared to the calculated pattern for the diatomic linear motif as reported by references <sup>9,10</sup> .....                                                                                                                                                                    | 19 |
| <b>Figure S27.</b> PXRD pattern of <b>3(2:3)</b> , compared to the calculated pattern for the rhomboid motif as reported by references <sup>6,8</sup> .....                                                                                                                                                                            | 20 |
| <b>Figure S28.</b> PXRD pattern of <b>4(2:3)</b> .....                                                                                                                                                                                                                                                                                 | 20 |
| <b>Figure S29.</b> PXRD pattern of <b>5(2:3)</b> , compared to the calculated pattern for the rhomboid motif as reported by reference <sup>5,6</sup> .....                                                                                                                                                                             | 21 |
| <b>Figure S30.</b> PXRD pattern of <b>6(2:3)</b> .....                                                                                                                                                                                                                                                                                 | 21 |
| <b>Figure S31.</b> PXRD pattern of <b>7(2:3)</b> .....                                                                                                                                                                                                                                                                                 | 22 |
| <b>Figure S32.</b> PXRD pattern of <b>8(2:3)</b> .....                                                                                                                                                                                                                                                                                 | 22 |
| <b>Figure S33.</b> PXRD pattern of <b>1(1:2)</b> .....                                                                                                                                                                                                                                                                                 | 23 |
| <b>Figure S34.</b> PXRD pattern of <b>2(1:2)</b> , compared to th calculated pattern for the diatomic linear motif as reported by references <sup>9,10</sup> .....                                                                                                                                                                     | 23 |
| <b>Figure S35.</b> PXRD pattern of <b>3(1:2)</b> .....                                                                                                                                                                                                                                                                                 | 24 |

|                                                                                                      |    |
|------------------------------------------------------------------------------------------------------|----|
| <b>Figure S36.</b> PXRD pattern of <b>4(1:2)</b> .....                                               | 24 |
| <b>Figure S37.</b> PXRD pattern of <b>5(1:2)</b> .....                                               | 25 |
| <b>Figure S38.</b> PXRD pattern of <b>6(1:2)</b> .....                                               | 25 |
| <b>Figure S39.</b> PXRD pattern of <b>7(1:2)</b> .....                                               | 26 |
| <b>Figure S40.</b> PXRD pattern of <b>8(1:2)</b> .....                                               | 26 |
| <b>Figure S41.</b> UV-Vis absorption and PL spectra of <b>1(2:1)</b> . Left : 293K. Right : 77K..... | 27 |
| <b>Figure S42.</b> UV-Vis absorption and PL spectra of <b>2(2:1)</b> . Left : 293K. Right : 77K..... | 27 |
| <b>Figure S43.</b> UV-Vis absorption and PL spectra of <b>3(2:1)</b> . Left : 293K. Right : 77K..... | 28 |
| <b>Figure S44.</b> UV-Vis absorption and PL spectra of <b>4(2:1)</b> . Left : 293K. Right : 77K..... | 28 |
| <b>Figure S45.</b> UV-Vis absorption and PL spectra of <b>5(2:1)</b> . Left : 293K. Right : 77K..... | 29 |
| <b>Figure S46.</b> UV-Vis absorption and PL spectra of <b>6(2:1)</b> . Left : 293K. Right : 77K..... | 29 |
| <b>Figure S47.</b> UV-Vis absorption and PL spectra of <b>7(2:1)</b> . Left : 293K. Right : 77K..... | 30 |
| <b>Figure S48.</b> UV-Vis absorption and PL spectra of <b>8(2:1)</b> . Left : 293K. Right : 77K..... | 30 |
| <b>Figure S49.</b> UV-Vis absorption and PL spectra of <b>1(3:2)</b> . Left : 293K. Right : 77K..... | 31 |
| <b>Figure S50.</b> UV-Vis absorption and PL spectra of <b>2(3:2)</b> . Left : 293K. Right : 77K..... | 31 |
| <b>Figure S51.</b> UV-Vis absorption and PL spectra of <b>3(3:2)</b> . Left : 293K. Right : 77K..... | 32 |
| <b>Figure S52.</b> UV-Vis absorption and PL spectra of <b>4(3:2)</b> . Left : 293K. Right : 77K..... | 32 |
| <b>Figure S53.</b> UV-Vis absorption and PL spectra of <b>5(3:2)</b> . Left : 293K. Right : 77K..... | 33 |
| <b>Figure S54.</b> UV-Vis absorption and PL spectra of <b>6(3:2)</b> . Left : 293K. Right : 77K..... | 33 |
| <b>Figure S55.</b> UV-Vis absorption and PL spectra of <b>7(3:2)</b> . Left : 293K. Right : 77K..... | 34 |
| <b>Figure S56.</b> UV-Vis absorption and PL spectra of <b>8(3:2)</b> . Left : 293K. Right : 77K..... | 34 |
| <b>Figure S57.</b> UV-Vis absorption and PL spectra of <b>1(1:1)</b> . Left : 293K. Right : 77K..... | 35 |
| <b>Figure S58.</b> UV-Vis absorption and PL spectra of <b>2(1:1)</b> . Left : 293K. Right : 77K..... | 35 |
| <b>Figure S59.</b> UV-Vis absorption and PL spectra of <b>3(1:1)</b> . Left : 293K. Right : 77K..... | 36 |
| <b>Figure S60.</b> UV-Vis absorption and PL spectra of <b>4(1:1)</b> . Left : 293K. Right : 77K..... | 36 |
| <b>Figure S61.</b> UV-Vis absorption and PL spectra of <b>5(1:1)</b> . Left : 293K. Right : 77K..... | 37 |
| <b>Figure S62.</b> UV-Vis absorption and PL spectra of <b>6(1:1)</b> . Left : 293K. Right : 77K..... | 37 |
| <b>Figure S63.</b> UV-Vis absorption and PL spectra of <b>7(1:1)</b> . Left : 293K. Right : 77K..... | 38 |
| <b>Figure S64.</b> UV-Vis absorption and PL spectra of <b>8(1:1)</b> . Left : 293K. Right : 77K..... | 38 |
| <b>Figure S65.</b> UV-Vis absorption and PL spectra of <b>1(2:3)</b> . Left : 293K. Right : 77K..... | 39 |
| <b>Figure S66.</b> UV-Vis absorption and PL spectra of <b>2(2:3)</b> . Left : 293K. Right : 77K..... | 39 |
| <b>Figure S67.</b> UV-Vis absorption and PL spectra of <b>3(2:3)</b> . Left : 293K. Right : 77K..... | 40 |
| <b>Figure S68.</b> UV-Vis absorption and PL spectra of <b>4(2:3)</b> . Left : 293K. Right : 77K..... | 40 |
| <b>Figure S69.</b> UV-Vis absorption and PL spectra of <b>5(2:3)</b> . Left : 293K. Right : 77K..... | 41 |
| <b>Figure S70.</b> UV-Vis absorption and PL spectra of <b>6(2:3)</b> . Left : 293K. Right : 77K..... | 41 |
| <b>Figure S71.</b> UV-Vis absorption and PL spectra of <b>7(2:3)</b> . Left : 293K. Right : 77K..... | 42 |
| <b>Figure S72.</b> UV-Vis absorption and PL spectra of <b>8(2:3)</b> . Left : 293K. Right : 77K..... | 42 |
| <b>Figure S73.</b> UV-Vis absorption and PL spectra of <b>1(1:2)</b> . Left : 293K. Right : 77K..... | 43 |
| <b>Figure S74.</b> UV-Vis absorption and PL spectra of <b>2(1:2)</b> . Left : 293K. Right : 77K..... | 43 |
| <b>Figure S75.</b> UV-Vis absorption and PL spectra of <b>3(1:2)</b> . Left : 293K. Right : 77K..... | 44 |

|                                                                                                            |    |
|------------------------------------------------------------------------------------------------------------|----|
| <b>Figure S76.</b> UV-Vis absorption and PL spectra of <b>4(1:2)</b> . Left : 293K. Right : 77K.....       | 44 |
| <b>Figure S77.</b> UV-Vis absorption and PL spectra of <b>5(1:2)</b> . Left : 293K. Right : 77K.....       | 45 |
| <b>Figure S78.</b> UV-Vis absorption and PL spectra of <b>6(1:2)</b> . Left : 293K. Right : 77K.....       | 45 |
| <b>Figure S79.</b> UV-Vis absorption and PL spectra of <b>7(1:2)</b> . Left : 293K. Right : 77K.....       | 46 |
| <b>Figure S80.</b> UV-Vis absorption and PL spectra of <b>8(1:2)</b> . Left : 293K. Right : 77K.....       | 46 |
| <b>Figure S81.</b> Photoluminescence and quantum yield of <b>1(2:1)</b> .....                              | 47 |
| <b>Figure S82.</b> Photoluminescence and quantum yield of <b>2(2:1)</b> .....                              | 47 |
| <b>Figure S83.</b> Photoluminescence and quantum yield of <b>3(2:1)</b> .....                              | 48 |
| <b>Figure S84.</b> Photoluminescence and quantum yield of <b>4(2:1)</b> .....                              | 48 |
| <b>Figure S85.</b> Photoluminescence and quantum yield of <b>5(2:1)</b> .....                              | 49 |
| <b>Figure S86.</b> Photoluminescence and quantum yield of <b>6(2:1)</b> .....                              | 49 |
| <b>Figure S87.</b> Photoluminescence and quantum yield of <b>7(2:1)</b> .....                              | 50 |
| <b>Figure S88.</b> Photoluminescence and quantum yield of <b>8(2:1)</b> .....                              | 50 |
| <b>Figure S89.</b> Photoluminescence and quantum yield of <b>1(3:2)</b> .....                              | 51 |
| <b>Figure S90.</b> Photoluminescence and quantum yield of <b>2(3:2)</b> .....                              | 51 |
| <b>Figure S91.</b> Photoluminescence and quantum yield of <b>3(3:2)</b> .....                              | 52 |
| <b>Figure S92.</b> Photoluminescence and quantum yield of <b>4(3:2)</b> .....                              | 52 |
| <b>Figure S93.</b> Photoluminescence and quantum yield of <b>5(3:2)</b> .....                              | 53 |
| <b>Figure S94.</b> Photoluminescence and quantum yield of <b>6(3:2)</b> .....                              | 53 |
| <b>Figure S95.</b> Photoluminescence and quantum yield of <b>7(3:2)</b> .....                              | 54 |
| <b>Figure S96.</b> Photoluminescence and quantum yield of <b>8(3:2)</b> .....                              | 54 |
| <b>Figure S97.</b> Photoluminescence and quantum yield of <b>2(1:1)</b> .....                              | 55 |
| <b>Figure S98.</b> Photoluminescence and quantum yield of <b>3(1:1)</b> .....                              | 55 |
| <b>Figure S99.</b> Photoluminescence and quantum yield of <b>5(1:1)</b> .....                              | 56 |
| <b>Figure S100.</b> Photoluminescence and quantum yield of <b>7(1:1)</b> .....                             | 56 |
| <b>Figure S101.</b> Photoluminescence and quantum yield of <b>8(1:1)</b> .....                             | 57 |
| <b>Figure S102.</b> Photoluminescence and quantum yield of <b>3(2:3)</b> .....                             | 57 |
| <b>Figure S103.</b> Photoluminescence and quantum yield of <b>4(2:3)</b> .....                             | 58 |
| <b>Figure S104.</b> Photoluminescence and quantum yield of <b>5(2:3)</b> .....                             | 58 |
| <b>Figure S105.</b> Photoluminescence and quantum yield of <b>7(2:3)</b> .....                             | 59 |
| <b>Figure S106.</b> Photoluminescence and quantum yield of <b>8(2:3)</b> .....                             | 59 |
| <b>Figure S107.</b> PL decay of <b>1(2:1)</b> at 293K .....                                                | 60 |
| <b>Figure S108.</b> PL decay of <b>1(2:1)</b> at 77K. Left : short lifetimes. Right : long lifetimes ..... | 60 |
| <b>Figure S109.</b> PL decay of <b>2(2:1)</b> at 293K .....                                                | 61 |
| <b>Figure S110.</b> PL decay of <b>2(2:1)</b> at 77K .....                                                 | 61 |
| <b>Figure S111.</b> PL decay of <b>3(2:1)</b> at 293K .....                                                | 62 |
| <b>Figure S112.</b> PL decay of <b>3(2:1)</b> at 77K .....                                                 | 62 |
| <b>Figure S113.</b> PL decay of <b>4(2:1)</b> at 293K .....                                                | 63 |
| <b>Figure S114.</b> PL decay of <b>4(2:1)</b> at 77K. Left : short lifetimes. Right : long lifetimes ..... | 63 |
| <b>Figure S115.</b> PL decay of <b>5(2:1)</b> at 293K .....                                                | 64 |



|                                                                                                             |    |
|-------------------------------------------------------------------------------------------------------------|----|
| <b>Figure S116.</b> PL decay of <b>5(2:1)</b> at 77K .....                                                  | 64 |
| <b>Figure S117.</b> PL decay of <b>6(2:1)</b> at 293K .....                                                 | 65 |
| <b>Figure S118.</b> PL decay of <b>7(2:1)</b> at 293K .....                                                 | 65 |
| <b>Figure S119.</b> PL decay of <b>8(2:1)</b> at 293K .....                                                 | 66 |
| <b>Figure S120.</b> PL decay of <b>1(3:2)</b> at 293K. Left : short lifetimes. Right : long lifetimes ..... | 66 |
| <b>Figure S121.</b> PL decay of <b>1(3:2)</b> at 77K. Left : short lifetimes. Right : long lifetimes .....  | 67 |
| <b>Figure S122.</b> PL decay of <b>2(3:2)</b> at 293K. Left : short lifetimes. Right : long lifetimes ..... | 67 |
| <b>Figure S123.</b> PL decay of <b>2(3:2)</b> at 77K .....                                                  | 68 |
| <b>Figure S124.</b> PL decay of <b>3(3:2)</b> at 293K .....                                                 | 68 |
| <b>Figure S125.</b> PL decay of <b>3(3:2)</b> at 77K .....                                                  | 69 |
| <b>Figure S126.</b> PL decay of <b>4(3:2)</b> at 293K .....                                                 | 69 |
| <b>Figure S127.</b> PL decay of <b>4(3:2)</b> at 77K. Left : short lifetimes. Right : long lifetimes .....  | 70 |
| <b>Figure S128.</b> PL decay of <b>5(3:2)</b> at 293K .....                                                 | 70 |
| <b>Figure S129.</b> PL decay of <b>5(3:2)</b> at 77K .....                                                  | 71 |
| <b>Figure S130.</b> PL decay of <b>6(3:2)</b> at 293K .....                                                 | 71 |
| <b>Figure S131.</b> PL decay of <b>6(3:2)</b> at 77K .....                                                  | 72 |
| <b>Figure S132.</b> PL decay of <b>7(3:2)</b> at 293K .....                                                 | 72 |
| <b>Figure S133.</b> PL decay of <b>7(3:2)</b> at 77K .....                                                  | 73 |
| <b>Figure S134.</b> PL decay of <b>8(3:2)</b> at 293K .....                                                 | 73 |
| <b>Figure S135.</b> PL decay of <b>8(3:2)</b> at 77K .....                                                  | 74 |
| <b>Figure S136.</b> PL decay of <b>1(1:1)</b> at 77K .....                                                  | 74 |
| <b>Figure S137.</b> PL decay of <b>2(1:1)</b> at 293K .....                                                 | 75 |
| <b>Figure S138.</b> PL decay of <b>2(1:1)</b> at 77K .....                                                  | 75 |
| <b>Figure S139.</b> PL decay of <b>3(1:1)</b> at 293K .....                                                 | 76 |
| <b>Figure S140.</b> PL decay of <b>3(1:1)</b> at 77K .....                                                  | 76 |
| <b>Figure S141.</b> PL decay of <b>4(1:1)</b> at 77K .....                                                  | 77 |
| <b>Figure S142.</b> PL decay of <b>5(1:1)</b> at 293K. Left : short lifetimes. Right : long lifetimes ..... | 77 |
| <b>Figure S143.</b> PL decay of <b>5(1:1)</b> at 77K .....                                                  | 78 |
| <b>Figure S144.</b> PL decay of <b>6(1:1)</b> at 77K .....                                                  | 78 |
| <b>Figure S145.</b> PL decay of <b>7(1:1)</b> at 293K. Left : short lifetimes. Right : long lifetimes ..... | 79 |
| <b>Figure S146.</b> PL decay of <b>7(1:1)</b> at 77K. Left : short lifetimes. Right : long lifetimes .....  | 79 |
| <b>Figure S147.</b> PL decay of <b>8(1:1)</b> at 77K .....                                                  | 80 |
| <b>Figure S148.</b> PL decay of <b>1(2:3)</b> at 293K .....                                                 | 80 |
| <b>Figure S149.</b> PL decay of <b>1(2:3)</b> at 77K .....                                                  | 81 |
| <b>Figure S150.</b> PL decay of <b>2(2:3)</b> at 293K .....                                                 | 81 |
| <b>Figure S151.</b> PL decay of <b>2(2:3)</b> at 77K. Left : short lifetimes. Right : long lifetimes .....  | 82 |
| <b>Figure S152.</b> PL decay of <b>3(2:3)</b> at 293K .....                                                 | 82 |
| <b>Figure S153.</b> PL decay of <b>3(2:3)</b> at 77K .....                                                  | 83 |
| <b>Figure S154.</b> PL decay of <b>4(2:3)</b> at 293K .....                                                 | 83 |
| <b>Figure S155.</b> PL decay of <b>4(2:3)</b> at 77K. Left : short lifetimes. Right : long lifetimes .....  | 84 |

|                                                                                                                                  |     |
|----------------------------------------------------------------------------------------------------------------------------------|-----|
| <b>Figure S156.</b> PL decay of <b>5(2:3)</b> at 293K. Left : short lifetimes. Right : long lifetimes .....                      | 84  |
| <b>Figure S157.</b> PL decay of <b>5(2:3)</b> at 77K .....                                                                       | 85  |
| <b>Figure S158.</b> PL decay of <b>6(2:3)</b> at 293K. Left : short lifetimes. Right : long lifetimes .....                      | 85  |
| <b>Figure S159.</b> PL decay of <b>6(2:3)</b> at 77K .....                                                                       | 86  |
| <b>Figure S160.</b> PL decay of <b>7(2:3)</b> at 77K. Left : short lifetimes. Right : long lifetimes .....                       | 86  |
| <b>Figure S161.</b> PL decay of <b>7(2:3)</b> at 77K. Left : short lifetimes. Right : long lifetimes .....                       | 87  |
| <b>Figure S162.</b> PL decay of <b>8(2:3)</b> at 293K. Left : short lifetimes. Right : long lifetimes .....                      | 87  |
| <b>Figure S163.</b> PL decay of <b>8(2:3)</b> at 77K. Left : short lifetimes. Right : long lifetimes .....                       | 88  |
| <b>Figure S164.</b> PL decay of <b>1(1:2)</b> at 77K .....                                                                       | 88  |
| <b>Figure S165.</b> PL decay of <b>2(1:2)</b> at 77K .....                                                                       | 89  |
| <b>Figure S166.</b> PL decay of <b>3(2:1)</b> at 77K .....                                                                       | 89  |
| <b>Figure S167.</b> PL decay of <b>4(1:2)</b> at 77K .....                                                                       | 90  |
| <b>Figure S168.</b> PL decay of <b>5(1:2)</b> at 77K .....                                                                       | 90  |
| <b>Figure S169.</b> PL decay of <b>6(1:2)</b> at 77K .....                                                                       | 91  |
| <b>Figure S170.</b> PL decay of <b>7(1:2)</b> at 293K .....                                                                      | 91  |
| <b>Figure S171.</b> PL decay of <b>7(1:2)</b> at 77K .....                                                                       | 92  |
| <b>Figure S172.</b> PL decay of <b>8(1:2)</b> at 77K .....                                                                       | 92  |
| <b>Table S1.</b> PL decay lifetime components for all compounds .....                                                            | 93  |
| <b>Figure S173.</b> Absolute time-resolved emission spectra of <b>5(1:1)</b> at 293K. $\lambda_{\text{ex}} = 378\text{nm}$ ..... | 97  |
| <b>Figure S174.</b> Normalized emission spectra of <b>5(1:1)</b> dependent on the temperature.....                               | 98  |
| <b>Figure S175.</b> 400 MHz $^1\text{H}$ NMR spectrum of <b>L7</b> in $\text{CDCl}_3$ .....                                      | 99  |
| <b>Figure S176.</b> 162 MHz $^{31}\text{P}$ NMR spectrum of <b>L7</b> in $\text{CDCl}_3$ .....                                   | 100 |
| <b>Figure S177.</b> 100 MHz $^{13}\text{C}$ NMR spectrum of <b>L7</b> in $\text{CDCl}_3$ .....                                   | 101 |
| <b>References</b> .....                                                                                                          | 101 |

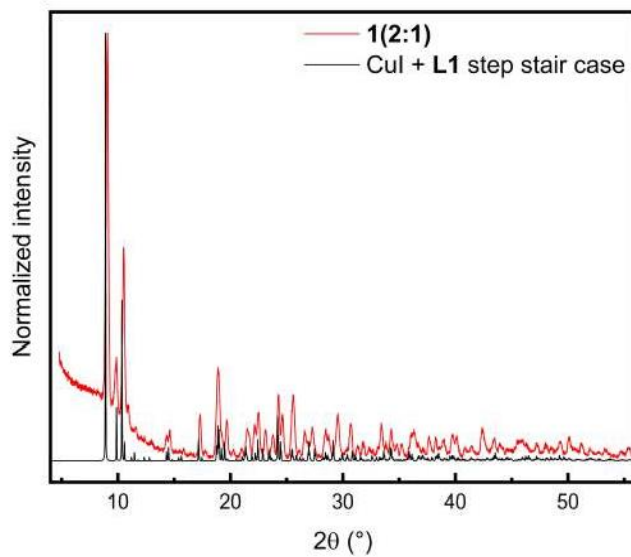

**Figure S1.** PXRD pattern of **1(2:1)**, compared to the calculated pattern for the step-staircase motif as reported by references <sup>1,2</sup>.

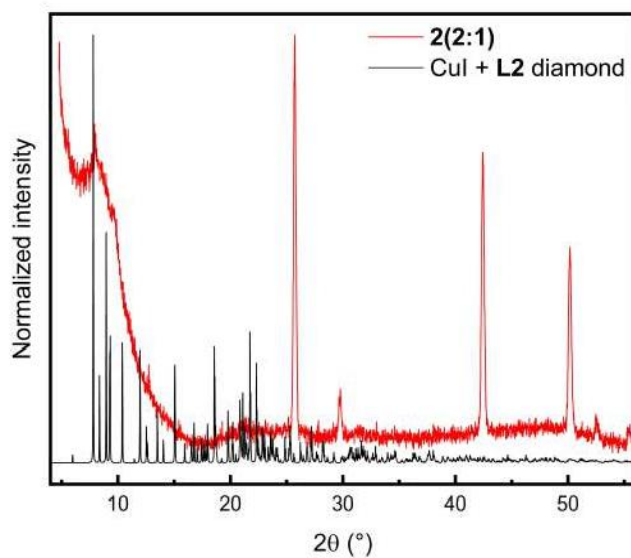

**Figure S2.** PXRD pattern of **2(2:1)**, compared to the calculated pattern for the diamond motif as reported by this work. Large peaks at 25.7°, 42.4°, and 50.1° are due to the presence of excess copper(I) iodide.

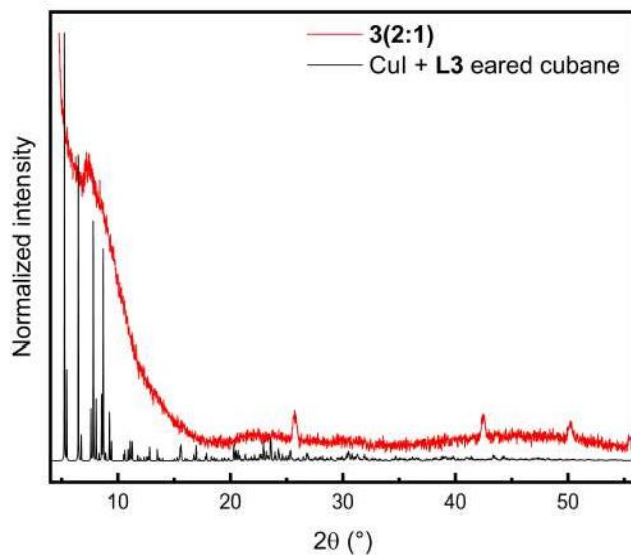

**Figure S3.** PXRD pattern of **3(2:1)**, compared to the calculated pattern for the eared cubane motif as reported by reference <sup>3</sup>. Large peaks at 25.7°, 42.4°, and 50.1° are due to the presence of excess copper(I) iodide.

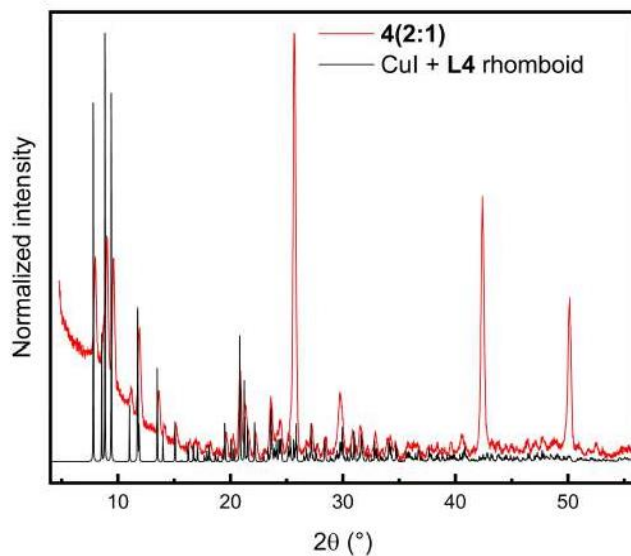

**Figure S4.** PXRD pattern of **4(2:1)**, compared to the calculated pattern for the rhomboid motif as reported by references <sup>4,5</sup>. Large peaks at 25.7°, 42.4°, and 50.1° are due to the presence of excess copper(I) iodide.

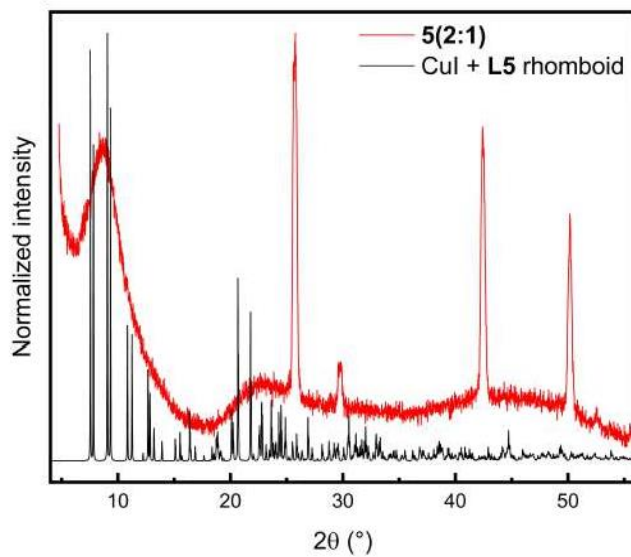

**Figure S5.** PXRD pattern of **5(2:1)**, compared to the calculated pattern for the rhomboid motif as reported by references <sup>5,6</sup>. Due to the large halo, no conclusive structural determination can be made. Large peaks at 25.7°, 42.4°, and 50.1° are due to the presence of excess copper(I) iodide.

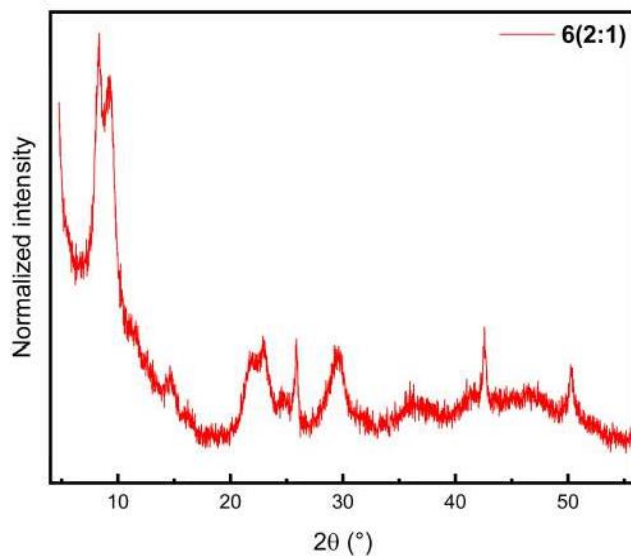

**Figure S6.** PXRD pattern of **6(2:1)**. Large peaks at 25.7°, 42.4°, and 50.1° are due to the presence of excess copper(I) iodide.

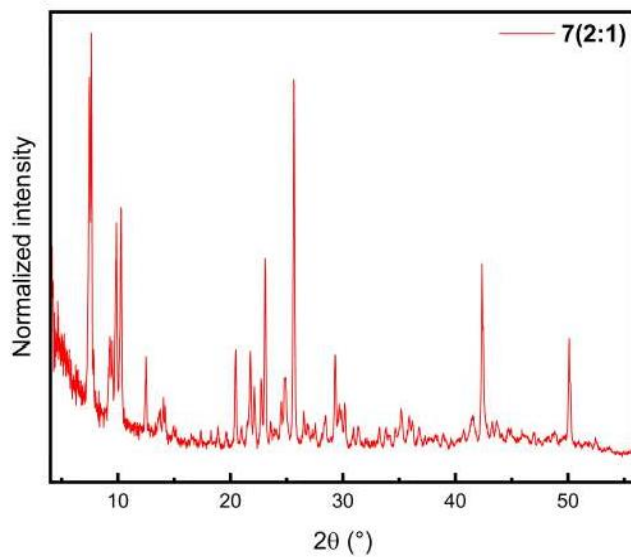

**Figure S7.** PXRD pattern of **7(2:1)**. Large peaks at 25.7°, 42.4°, and 50.1° are due to the presence of excess copper(I) iodide.

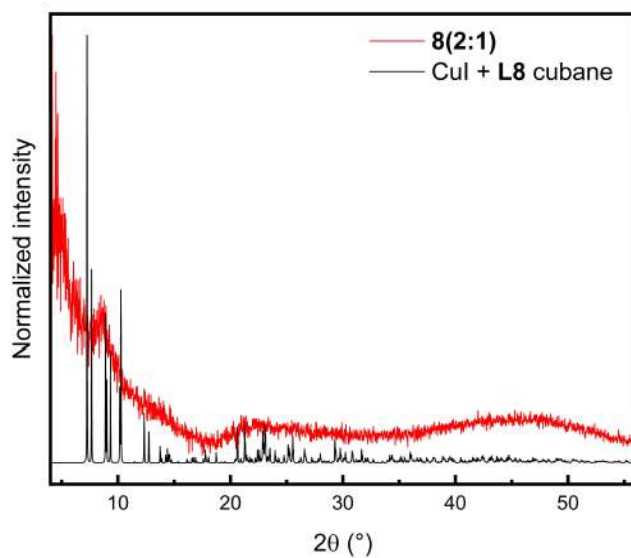

**Figure S8.** PXRD pattern of **8(2:1)**, compared to the calculated pattern for the cubane motif as reported by this work.

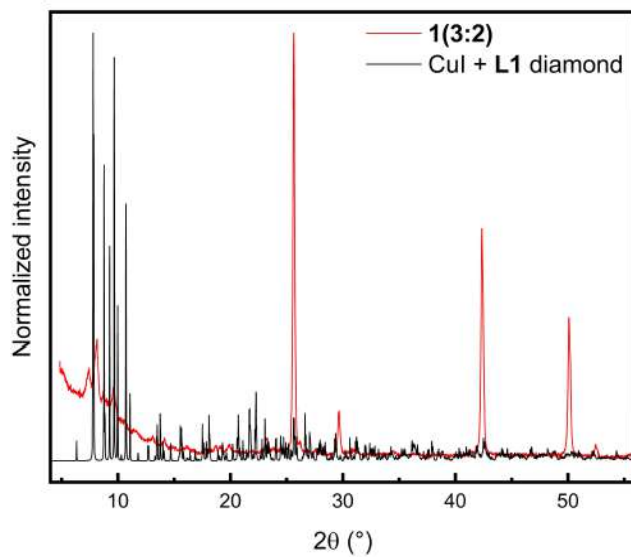

**Figure S9.** PXRD pattern of **1(3:2)**, compared to the calculated pattern for the diamond motif as reported by reference <sup>7</sup>. Large peaks at 25.7°, 42.4°, and 50.1° are due to the presence of excess copper(I) iodide.

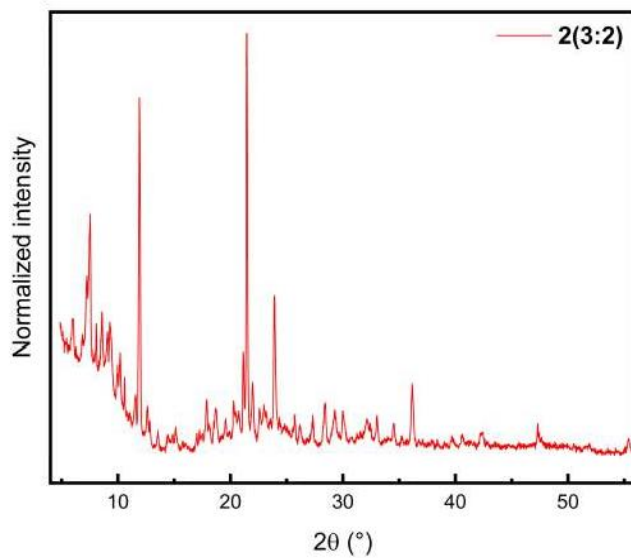

**Figure S10.** PXRD pattern of **2(3:2)**.

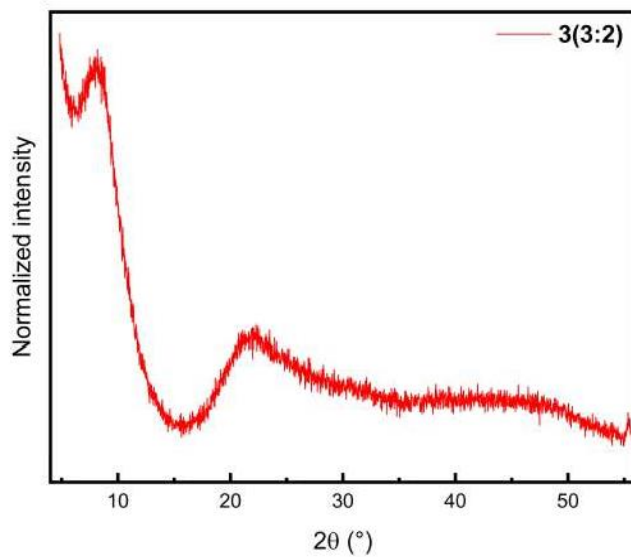

**Figure S11.** PXRD pattern of **3(3:2)**.

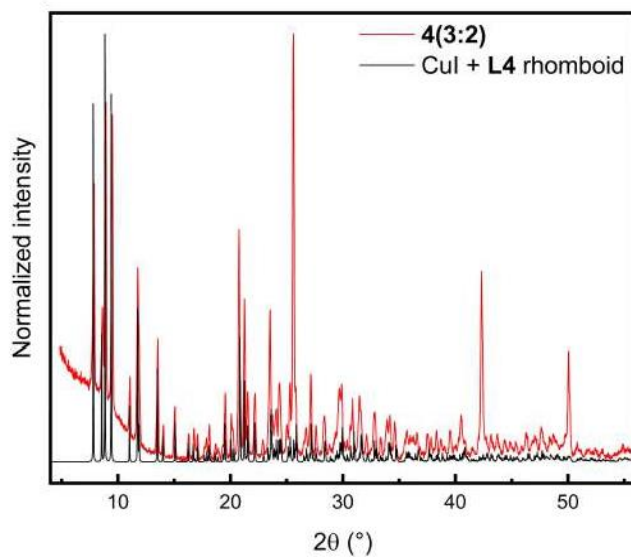

**Figure S12.** PXRD pattern of **4(3:2)**, compared to the calculated pattern for the rhomboid motif as reported by references <sup>4,5</sup>. Large peaks at 25.7°, 42.4°, and 50.1° are due to the presence of excess copper(I) iodide.



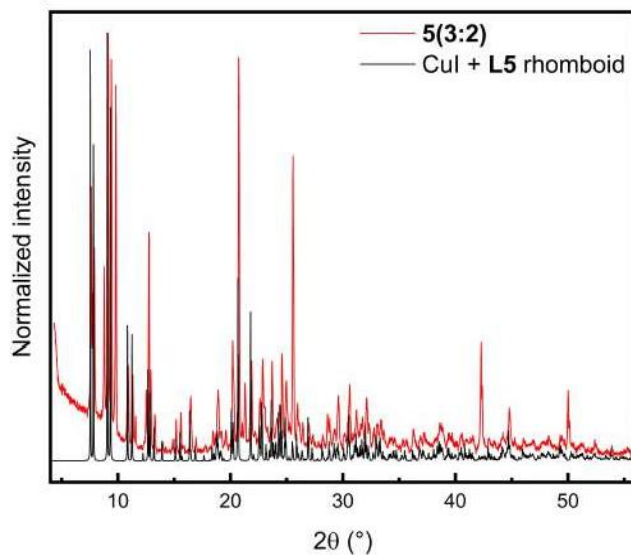

**Figure S13.** PXRD pattern of **5(3:2)**, compared to the calculated pattern for the rhomboid motif as reported by reference <sup>5,6</sup>. This sample is concluded to be a mix of the rhomboid motif and another unknown motif. Peaks at 25.7°, 42.4°, and 50.1° are due to the presence of excess copper(I) iodide.

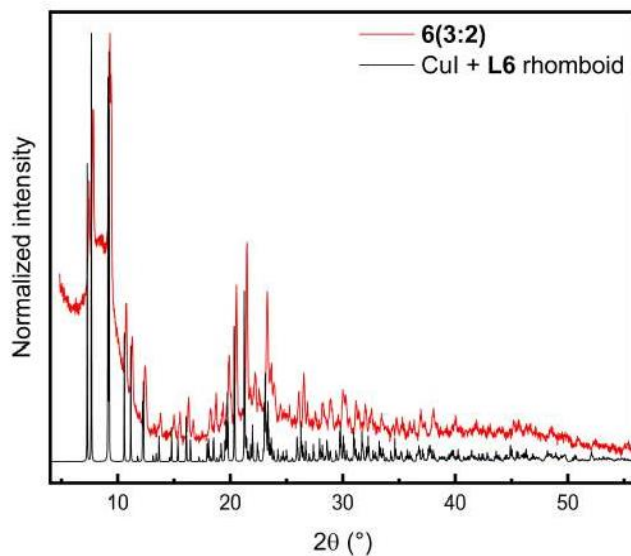

**Figure S14.** PXRD pattern of **6(3:2)** compared to the calculated pattern for the rhomboid motif as reported by this work. This sample is concluded to be a mix of the rhomboid motif and another unknown motif.

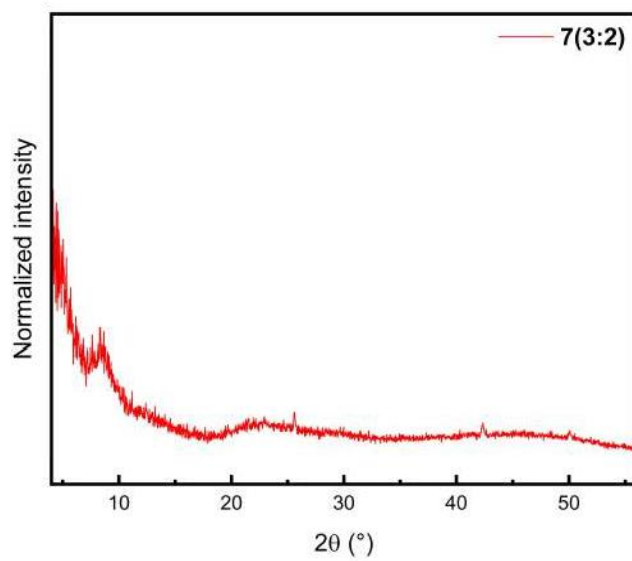

**Figure S15.** PXRD pattern of **7(3:2)**.

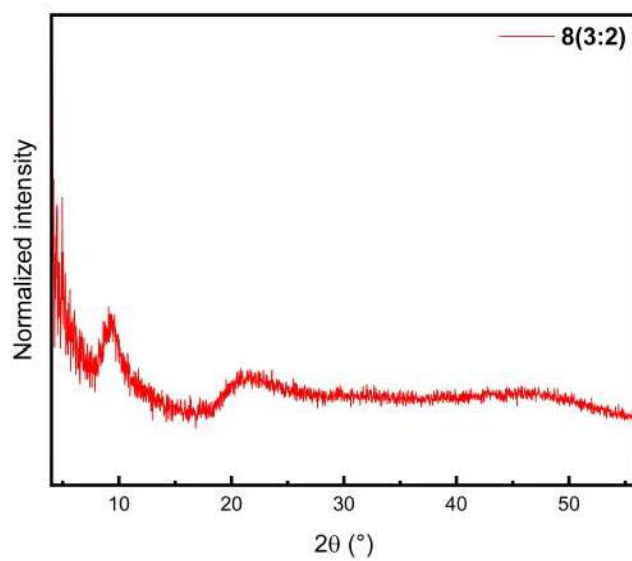

**Figure S16.** PXRD pattern of **8(3:2)**.

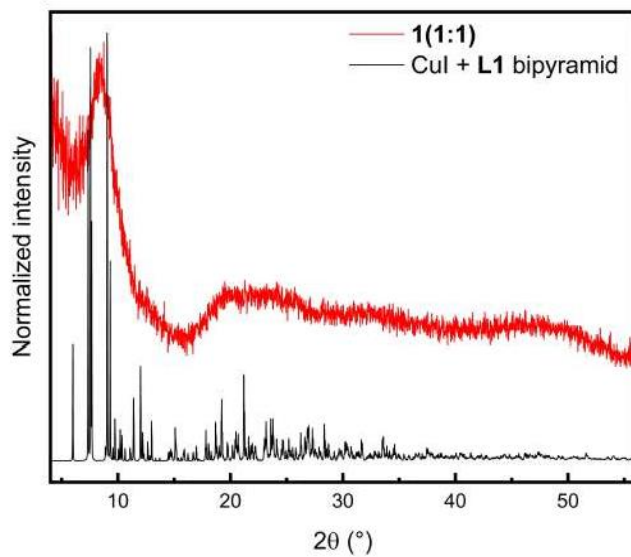

**Figure S17.** PXRD pattern of **1(1:1)**, compared to the calculated pattern for the bipyramid motif as reported by this work.

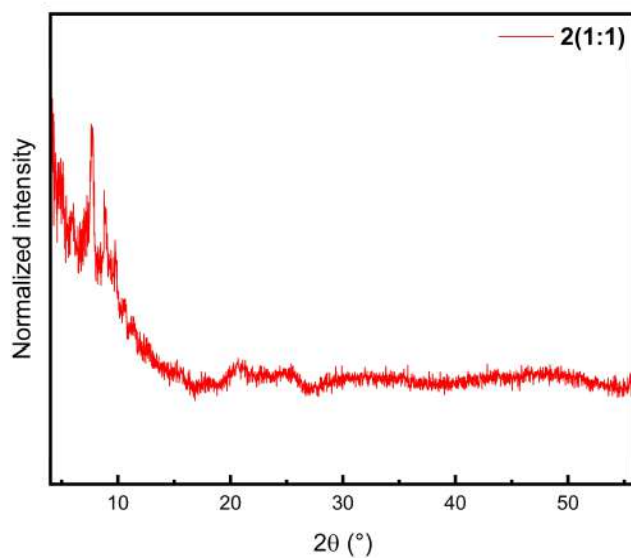

**Figure S18.** PXRD pattern for **2(1:1)**.

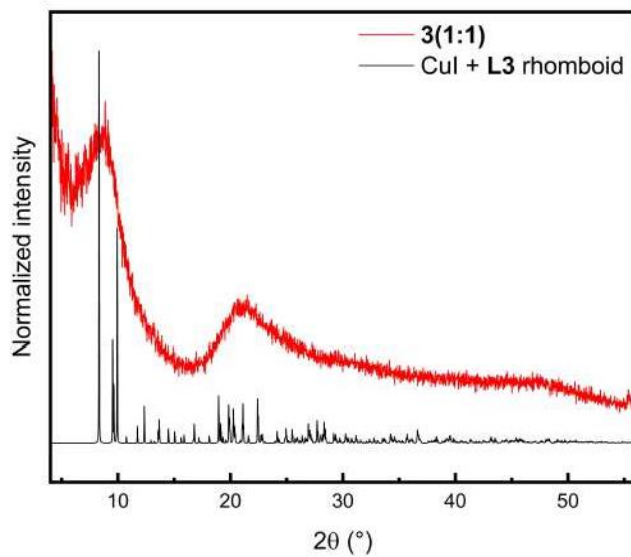

**Figure S19.** PXRD pattern of **3(1:1)**, compared to the calculated pattern for the rhomboid motif as reported by references <sup>6,8</sup>.

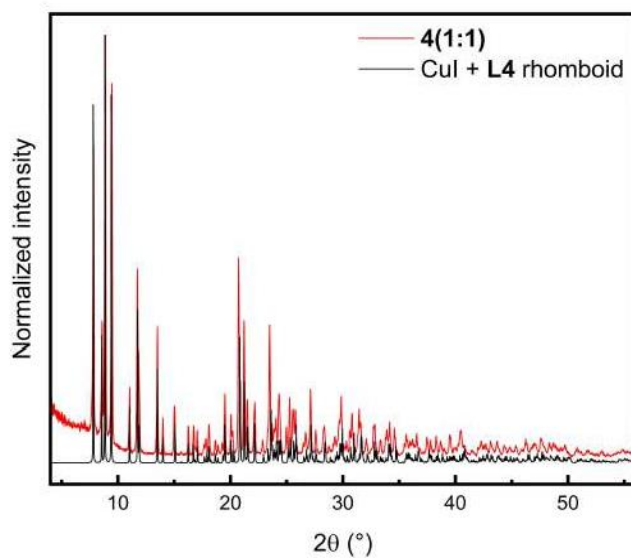

**Figure S20.** PXRD pattern of **4(1:1)**, compared to the calculated pattern for the rhomboid motif as reported by references <sup>4,5</sup>.

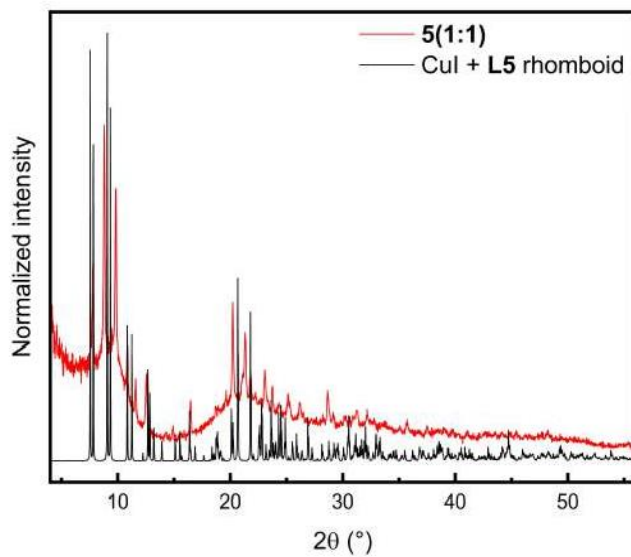

**Figure S21.** PXRD pattern of **5(1:1)**, compared to the calculated pattern for the rhomboid motif as reported by references <sup>5,6</sup>.

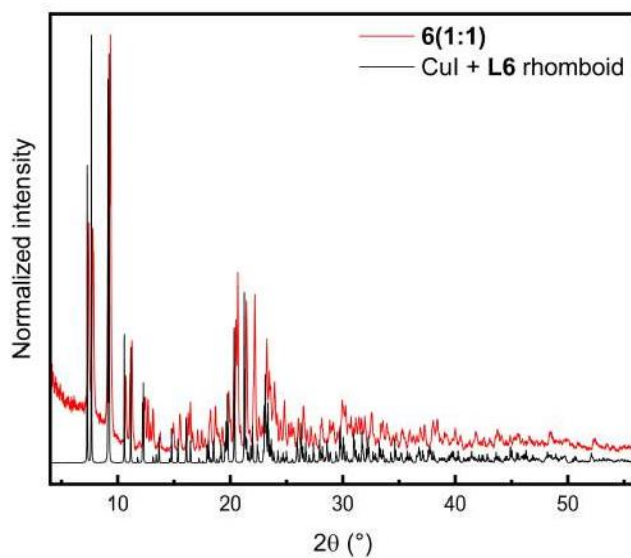

**Figure S22.** PXRD pattern of **6(1:1)** compared to the calculated pattern for the rhomboid motif as reported by this work.

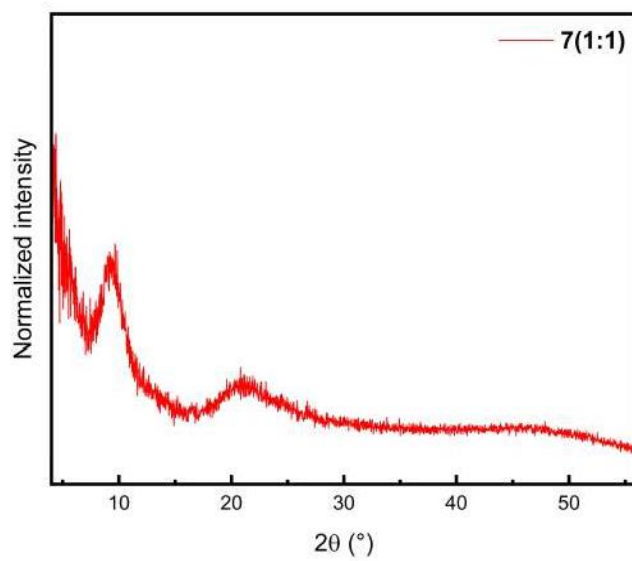

**Figure S23.** PXRD pattern of **7(1:1)**.

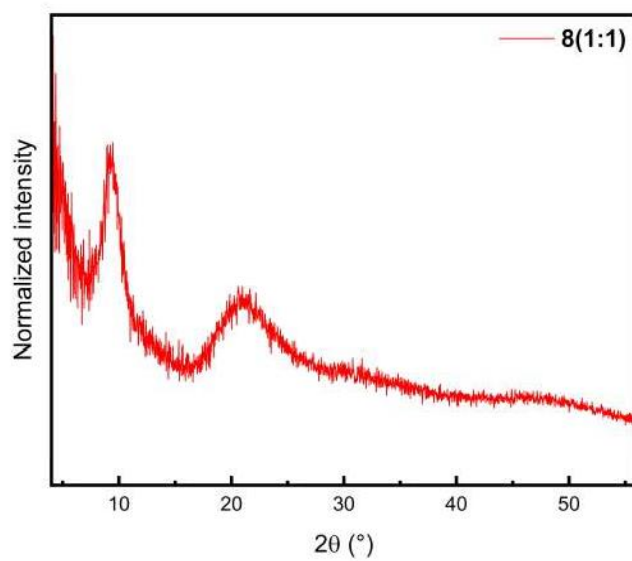

**Figure S24.** PXRD pattern of **8(1:1)**.

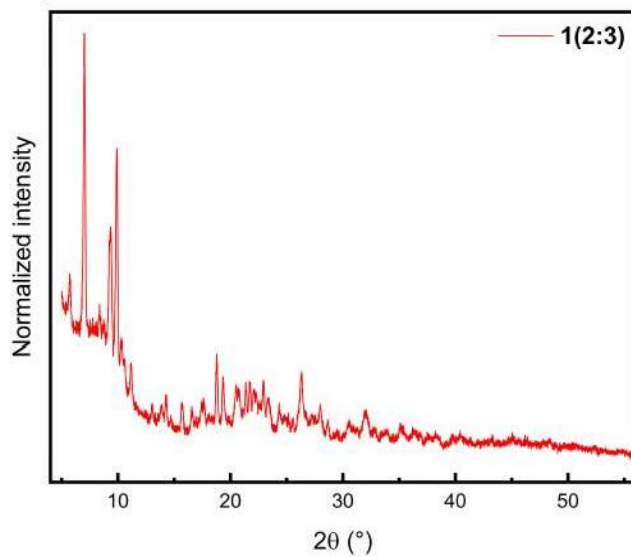

**Figure S25.** PXRD pattern of **1(2:3)**.

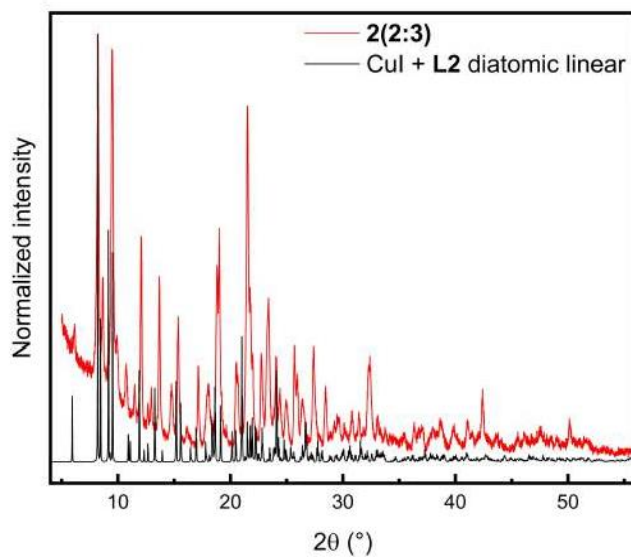

**Figure S26.** PXRD pattern of **2(2:3)**, compared to the calculated pattern for the diatomic linear motif as reported by references <sup>9,10</sup>.

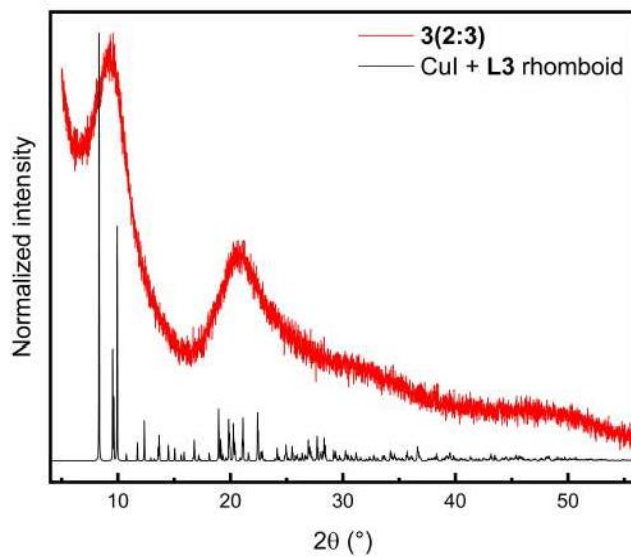

**Figure S27.** PXRD pattern of **3(2:3)**, compared to the calculated pattern for the rhomboid motif as reported by references <sup>6,8</sup>.

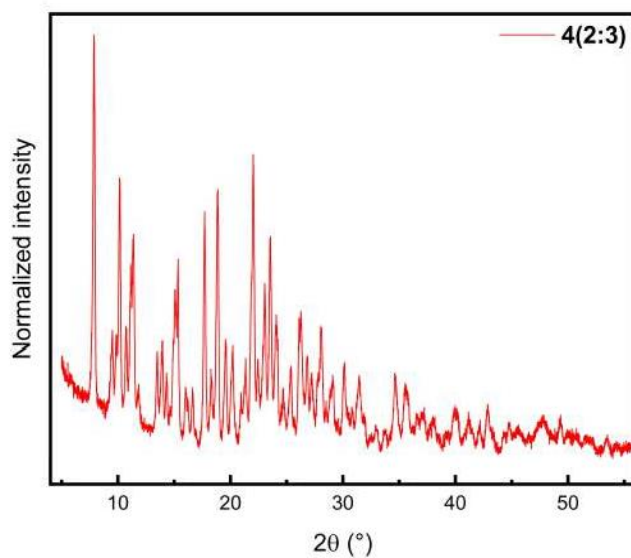

**Figure S28.** PXRD pattern of **4(2:3)**.



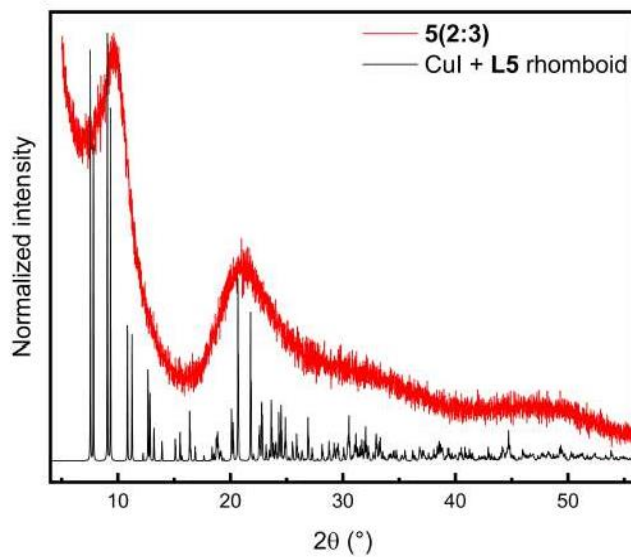

**Figure S29.** PXRD pattern of **5(2:3)**, compared to the calculated pattern for the rhomboid motif as reported by reference <sup>5,6</sup>.

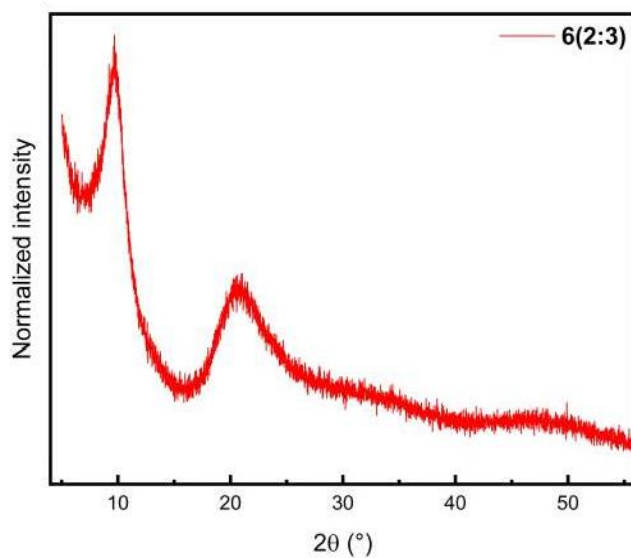

**Figure S30.** PXRD pattern of **6(2:3)**.

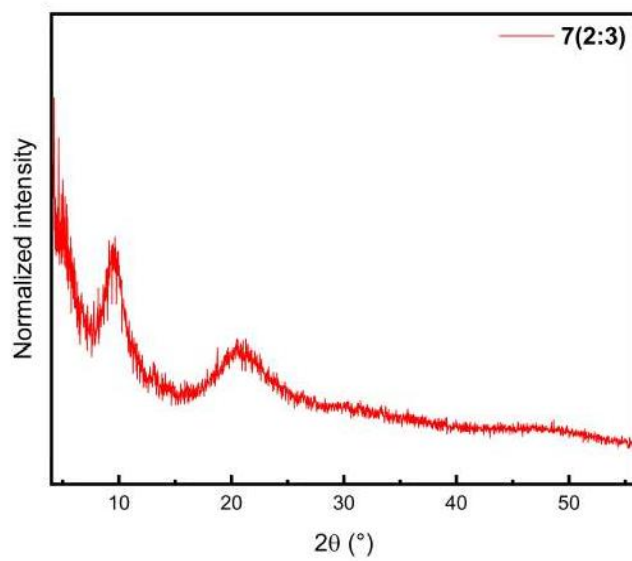

**Figure S31.** PXRD pattern of **7(2:3)**.

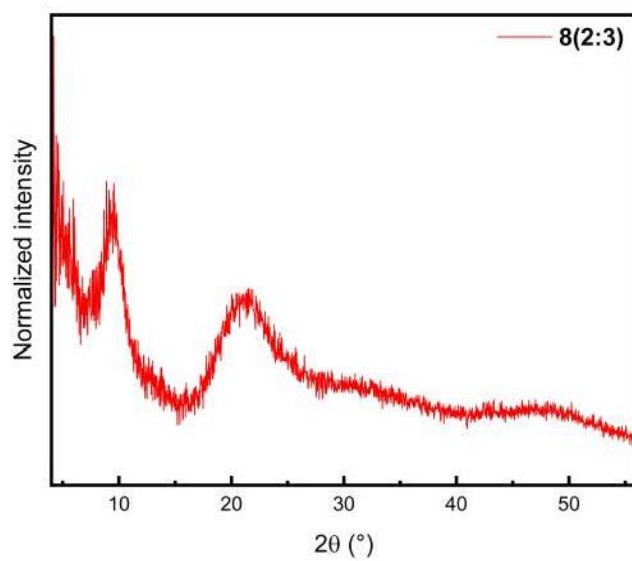

**Figure S32.** PXRD pattern of **8(2:3)**.

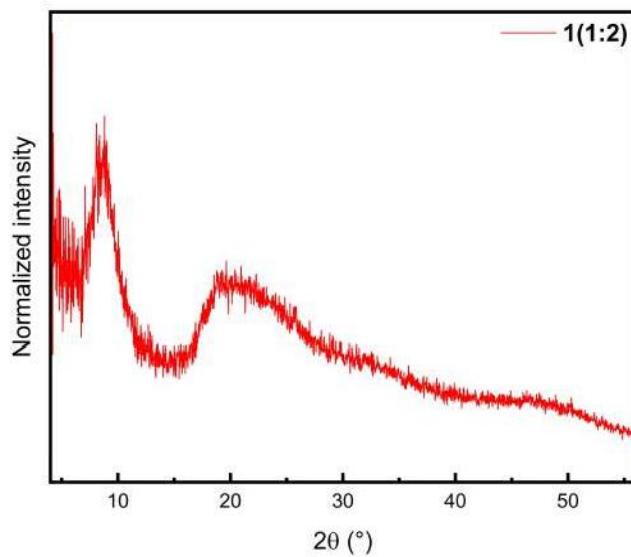

**Figure S33.** PXRD pattern of **1(1:2)**.

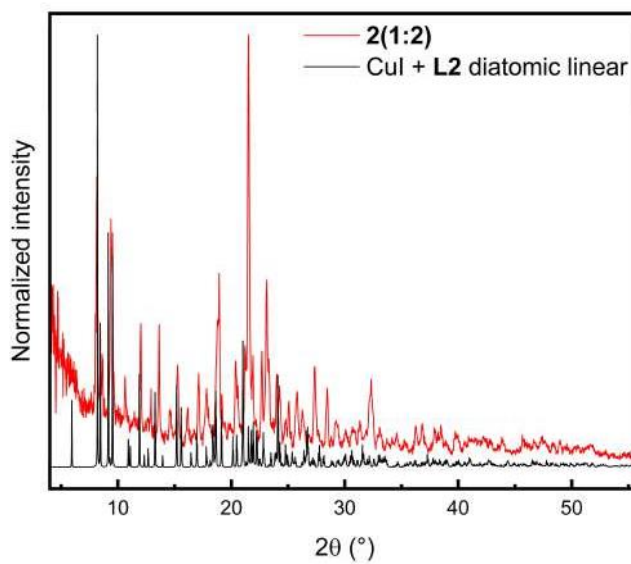

**Figure S34.** PXRD pattern of **2(1:2)**, compared to the calculated pattern for the diatomic linear motif as reported by references <sup>9,10</sup>.

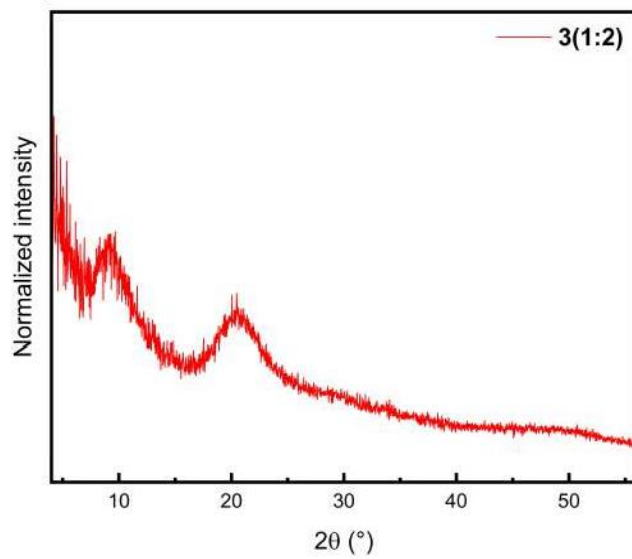

**Figure S35.** PXRD pattern of **3(1:2)**.

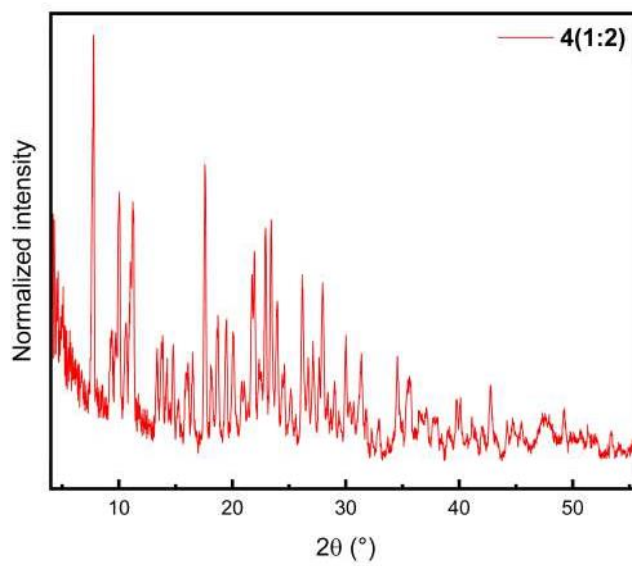

**Figure S36.** PXRD pattern of **4(1:2)**.

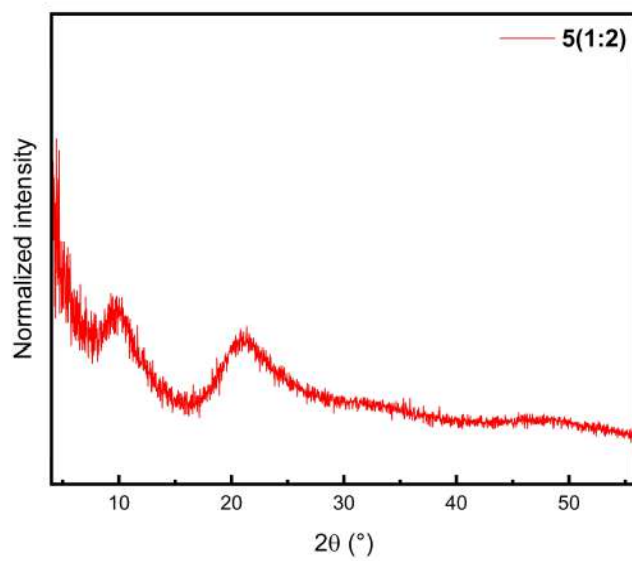

**Figure S37.** PXRD pattern of **5(1:2)**.

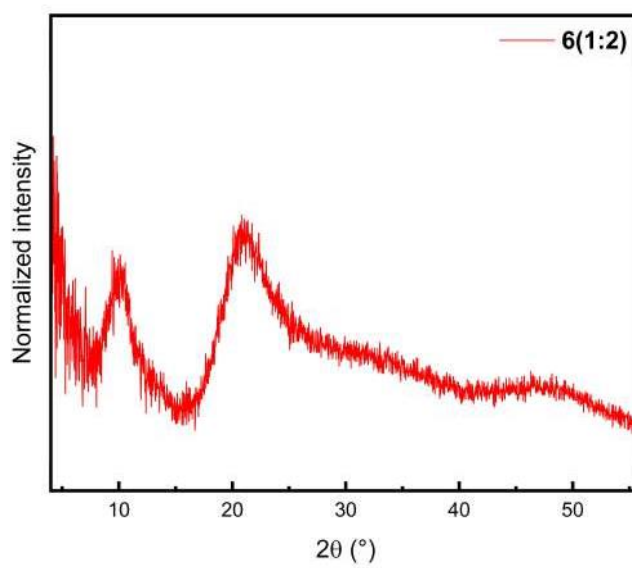

**Figure S38.** PXRD pattern of **6(1:2)**.

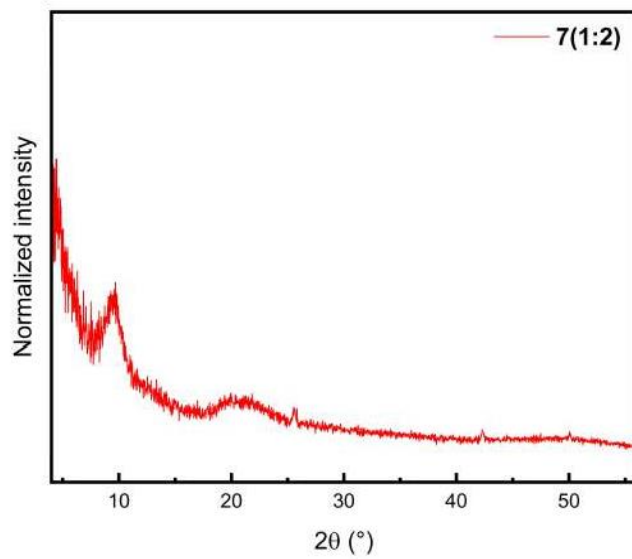

**Figure S39.** PXRD pattern of **7(1:2)**.

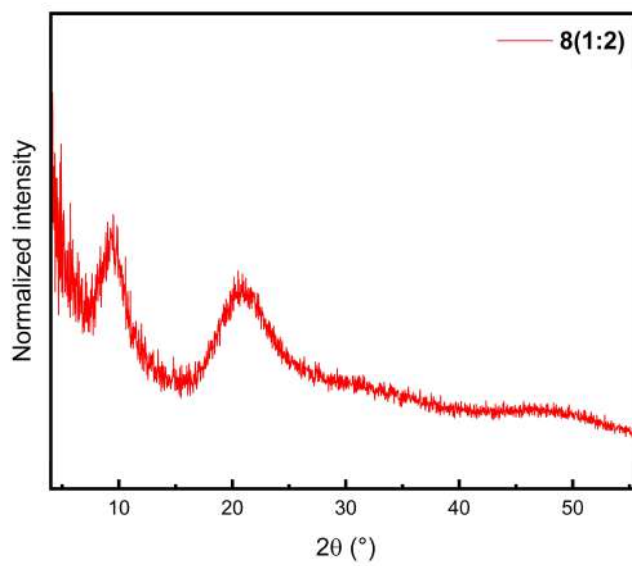

**Figure S40.** PXRD pattern of **8(1:2)**.

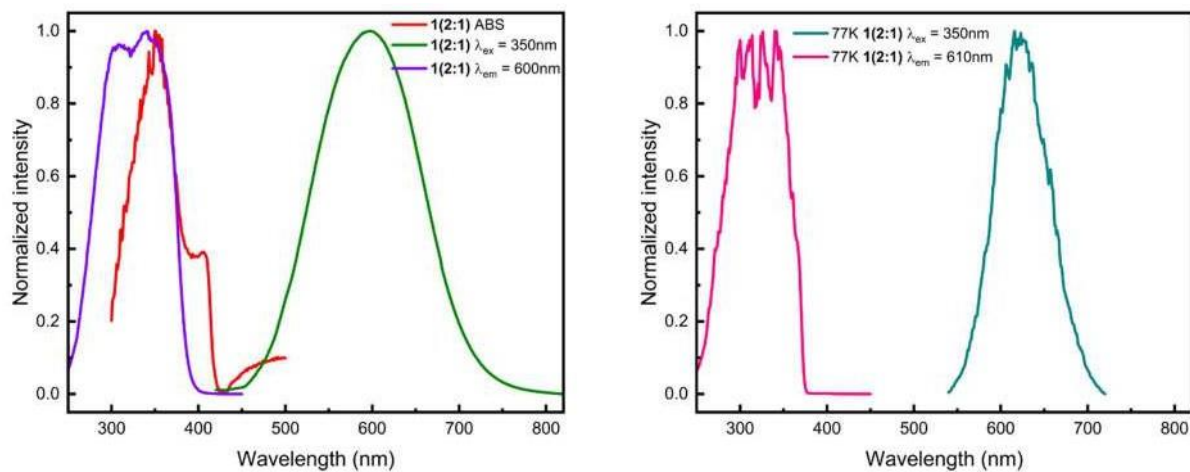

**Figure S41.** UV-Vis absorption and PL spectra of **1(2:1)**. Left : 293K. Right : 77K.

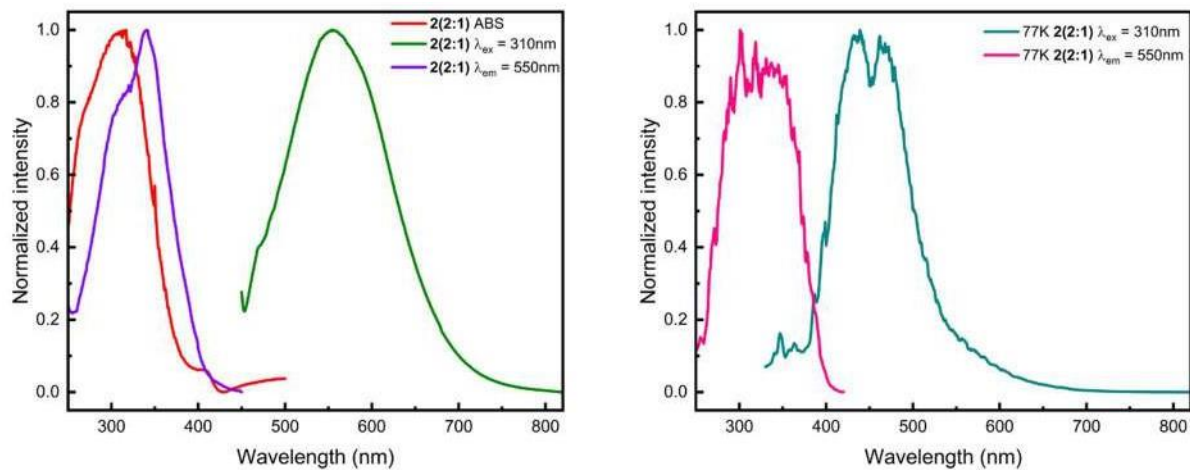

**Figure S42.** UV-Vis absorption and PL spectra of **2(2:1)**. Left : 293K. Right : 77K.

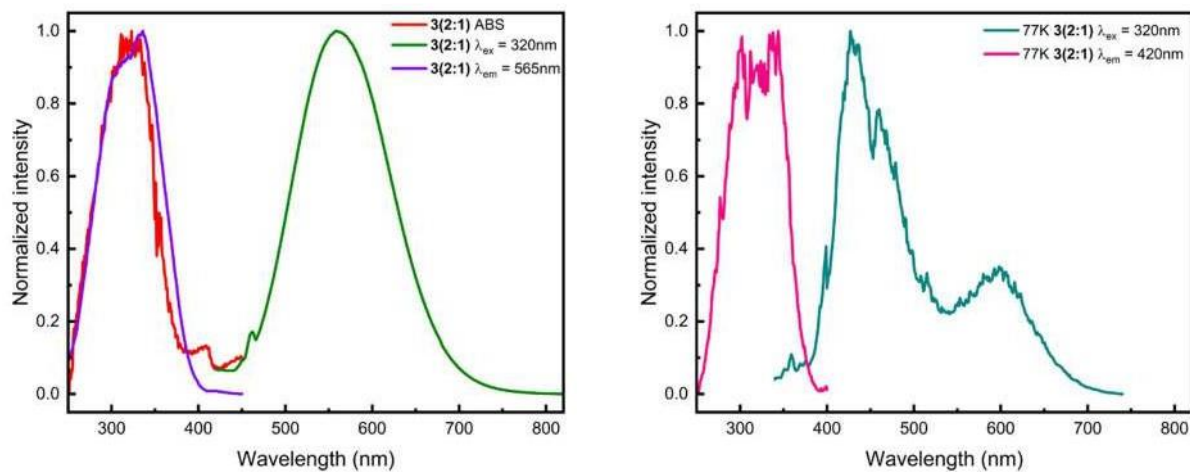

**Figure S43.** UV-Vis absorption and PL spectra of **3(2:1)**. Left : 293K. Right : 77K

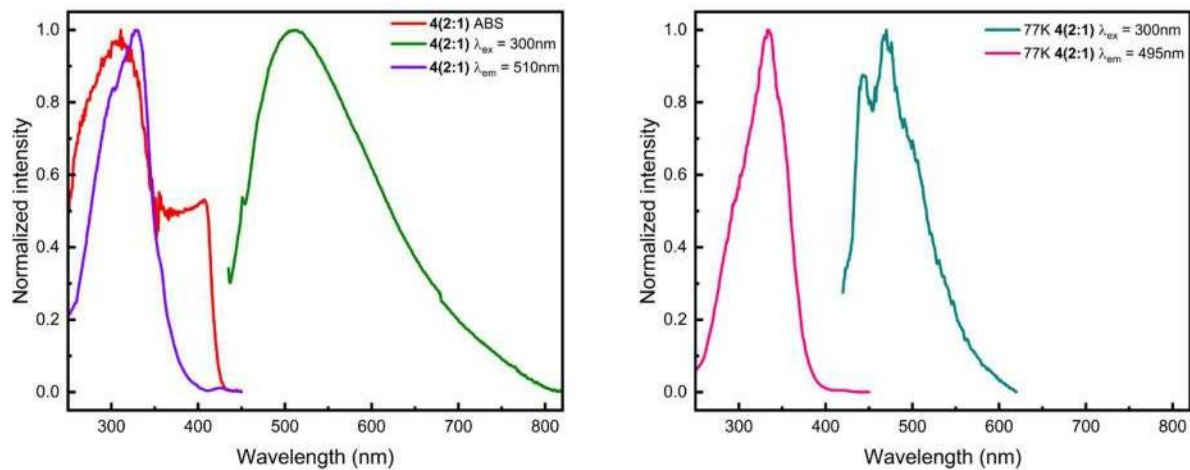

**Figure S44.** UV-Vis absorption and PL spectra of **4(2:1)**. Left : 293K. Right : 77K



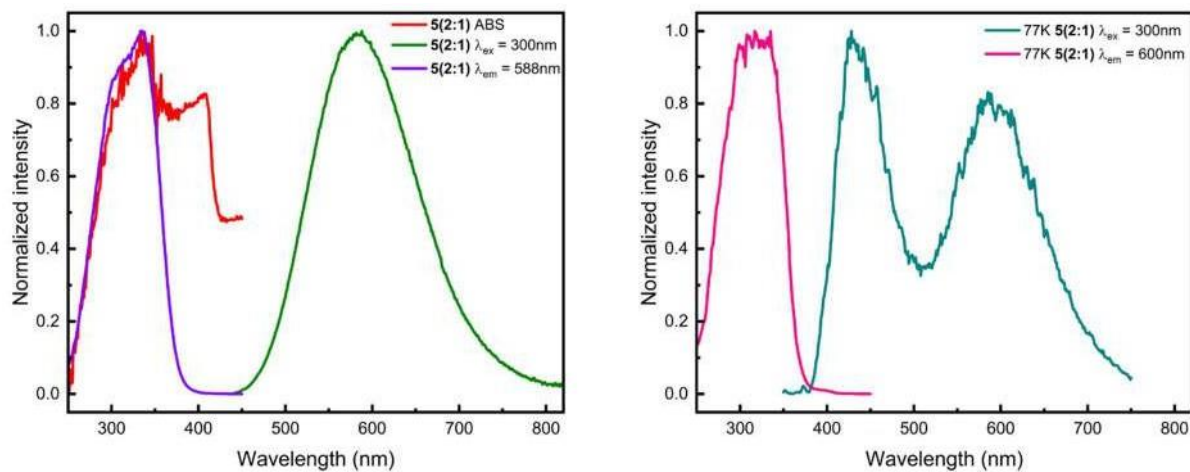

**Figure S45.** UV-Vis absorption and PL spectra of **5(2:1)**. Left : 293K. Right : 77K

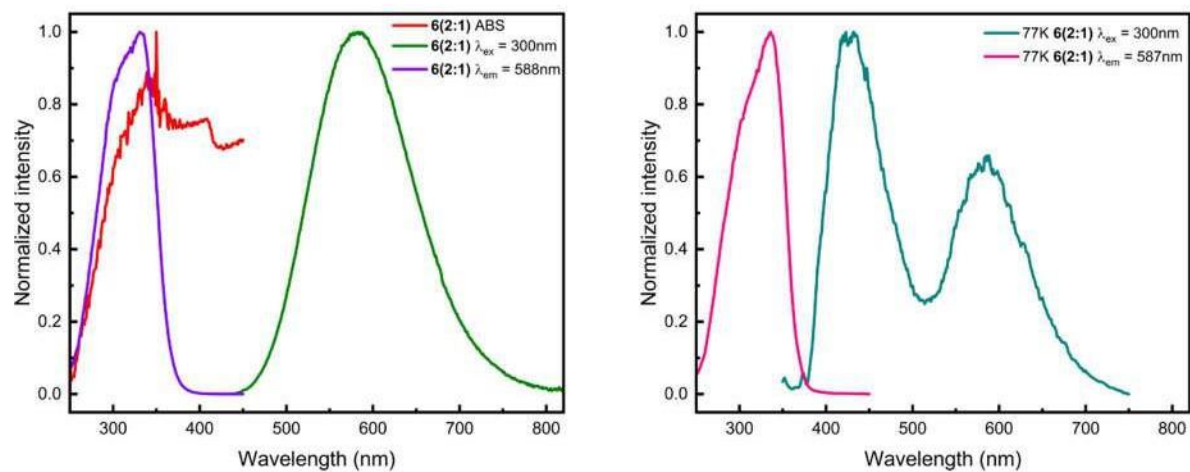

**Figure S46.** UV-Vis absorption and PL spectra of **6(2:1)**. Left : 293K. Right : 77K

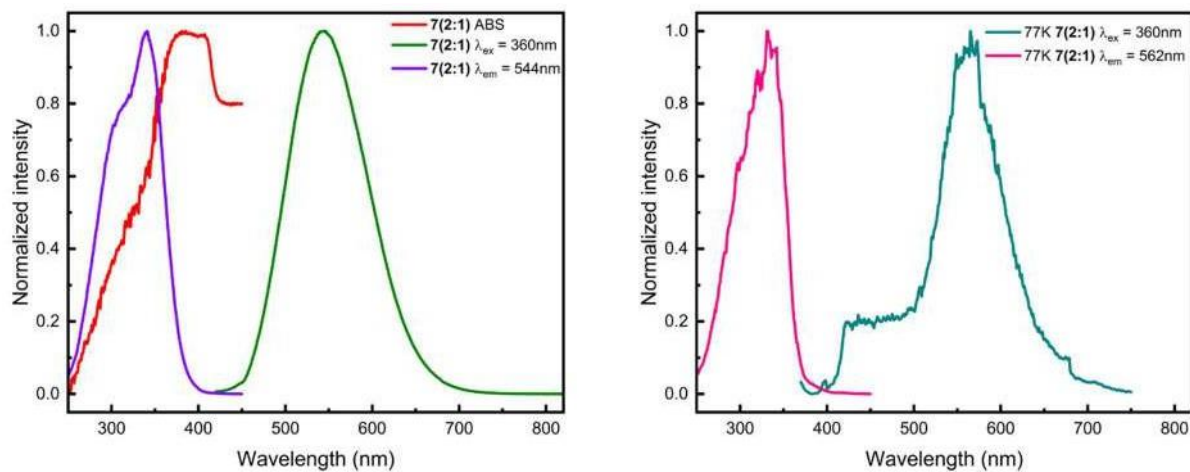

**Figure S47.** UV-Vis absorption and PL spectra of **7(2:1)**. Left : 293K. Right : 77K

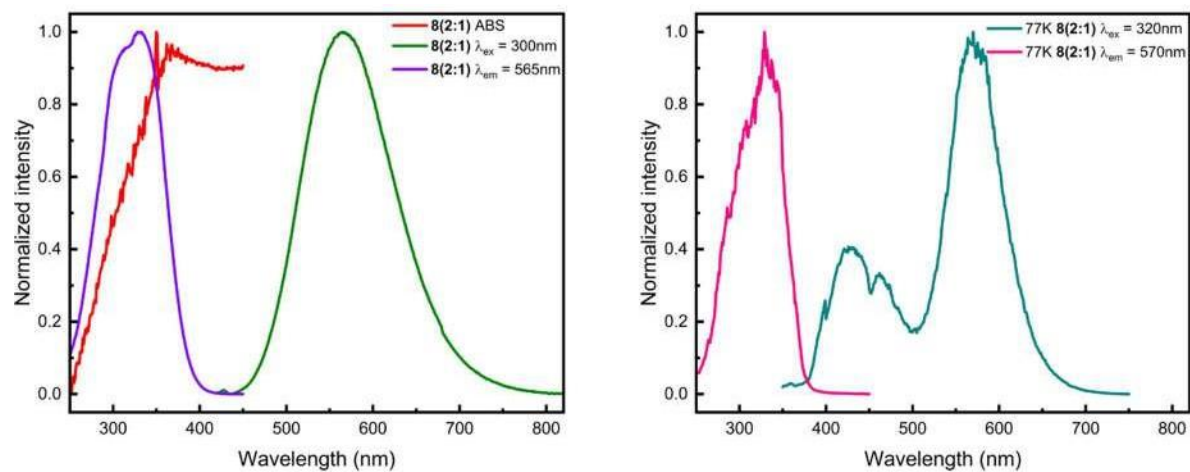

**Figure S48.** UV-Vis absorption and PL spectra of **8(2:1)**. Left : 293K. Right : 77K

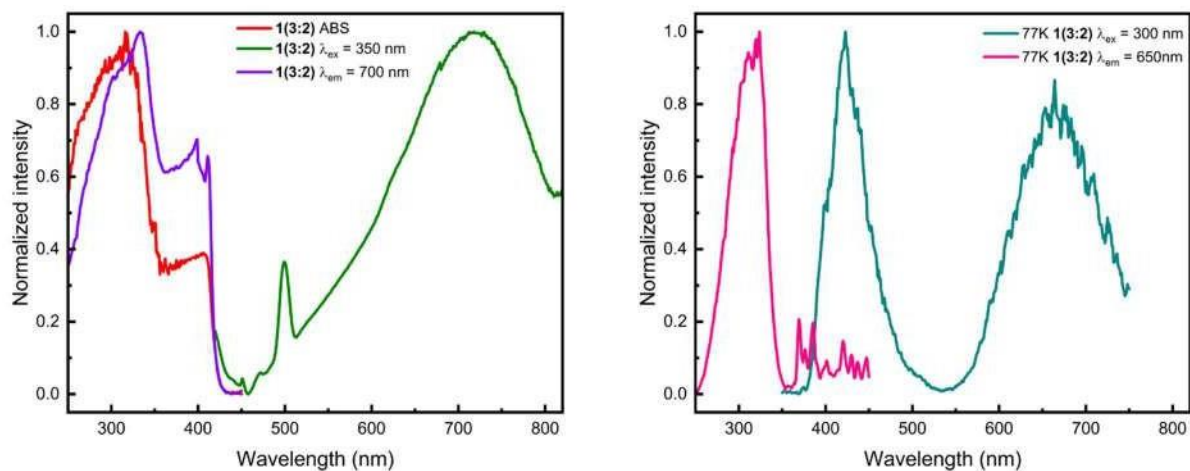

**Figure S49.** UV-Vis absorption and PL spectra of **1(3:2)**. Left : 293K. Right : 77K

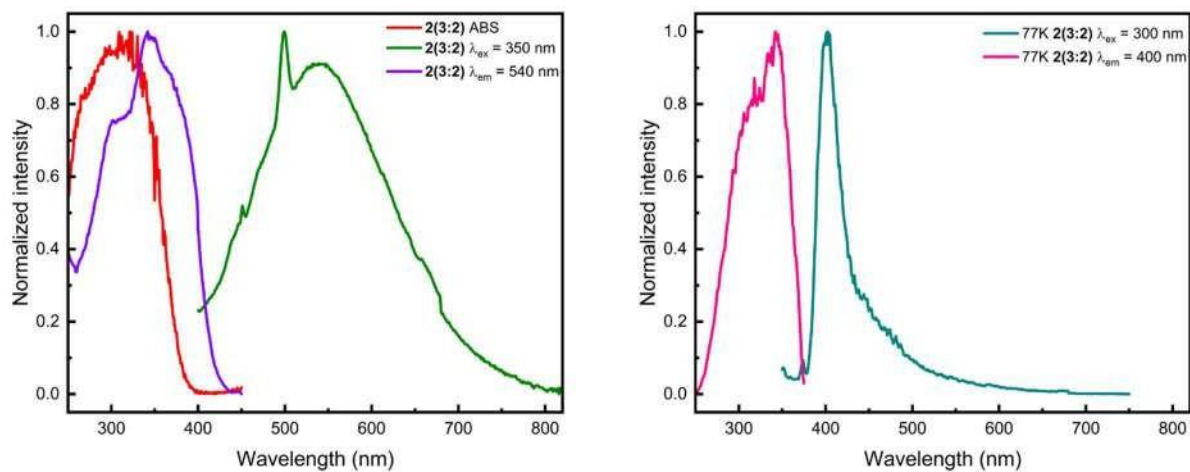

**Figure S50.** UV-Vis absorption and PL spectra of **2(3:2)**. Left : 293K. Right : 77K

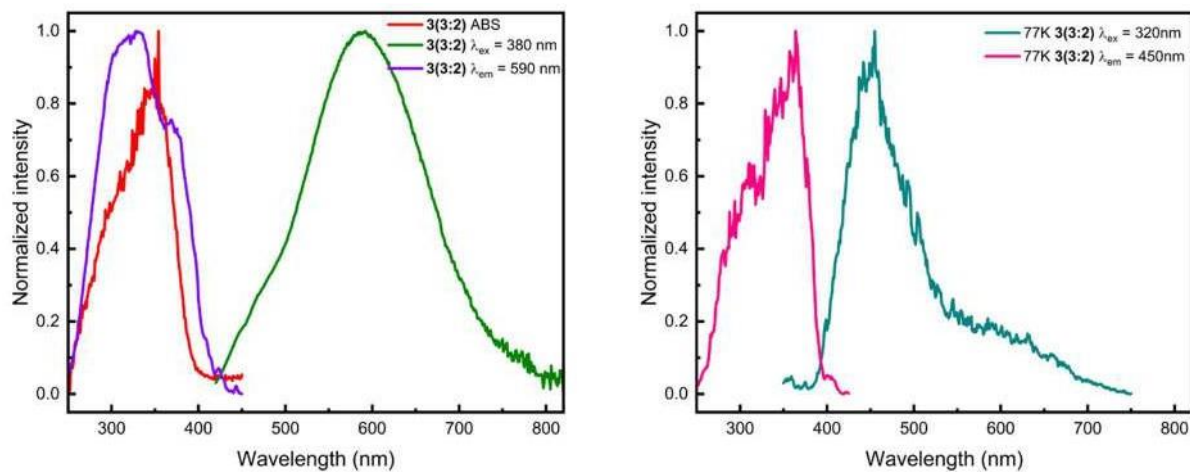

**Figure S51.** UV-Vis absorption and PL spectra of **3(3:2)**. Left : 293K. Right : 77K

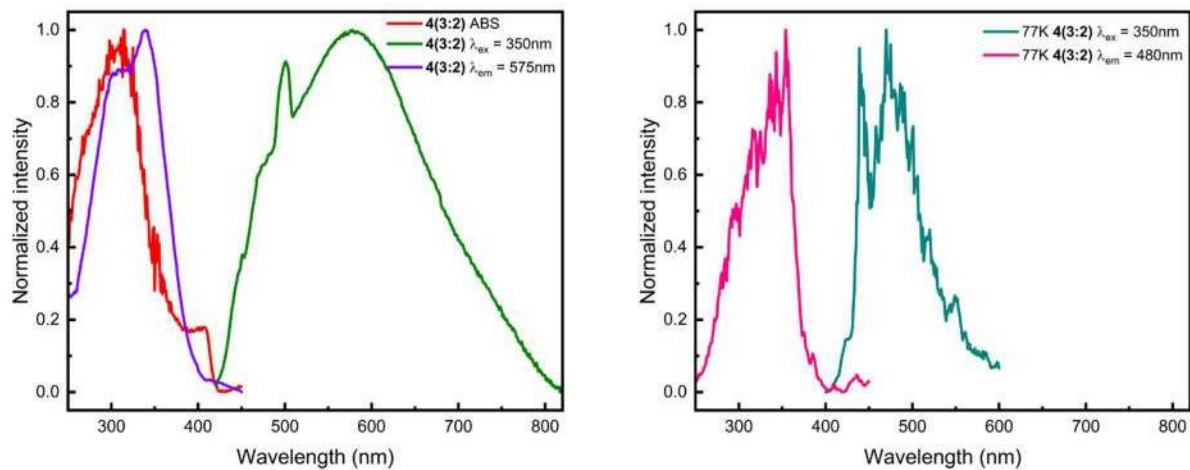

**Figure S52.** UV-Vis absorption and PL spectra of **4(3:2)**. Left : 293K. Right : 77K

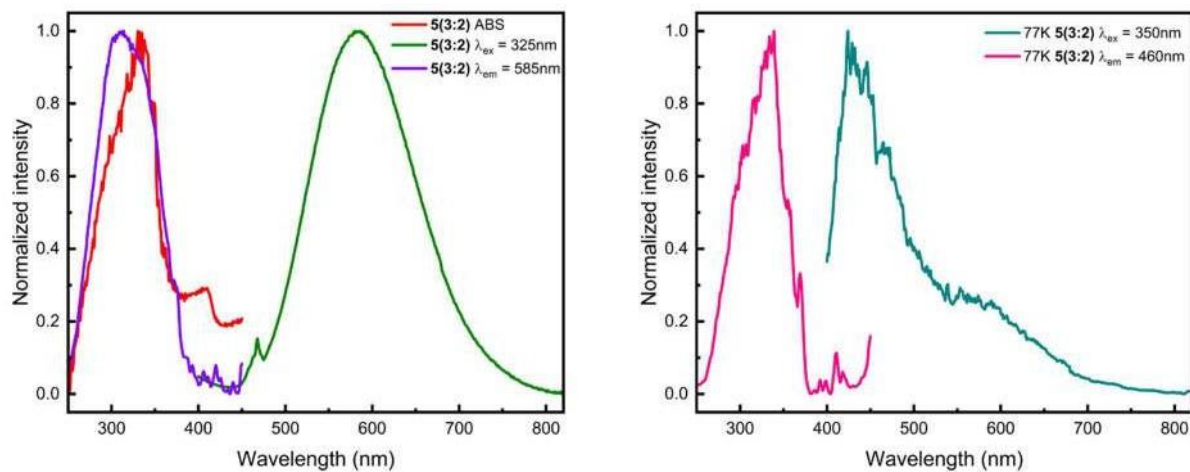

**Figure S53.** UV-Vis absorption and PL spectra of **5(3:2)**. Left : 293K. Right : 77K

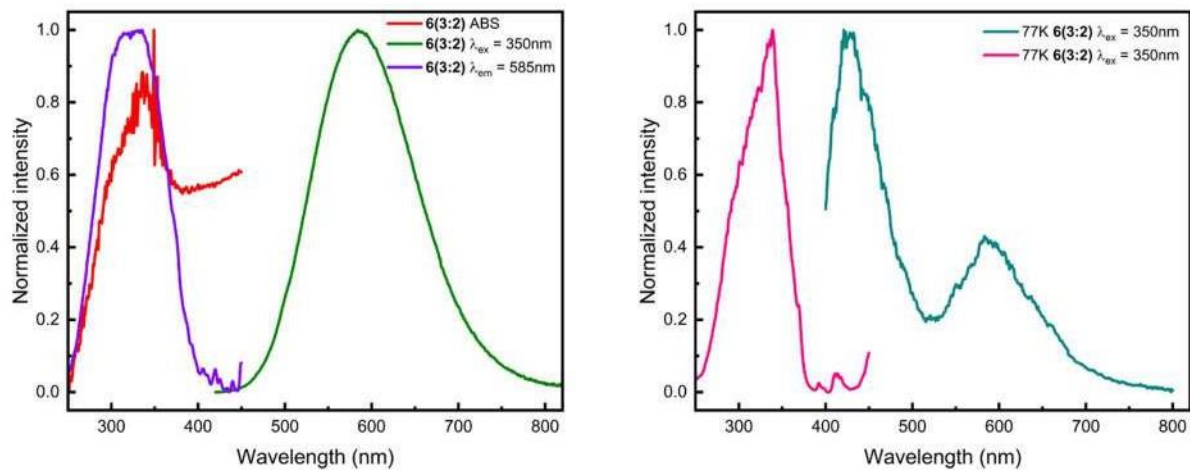

**Figure S54.** UV-Vis absorption and PL spectra of **6(3:2)**. Left : 293K. Right : 77K

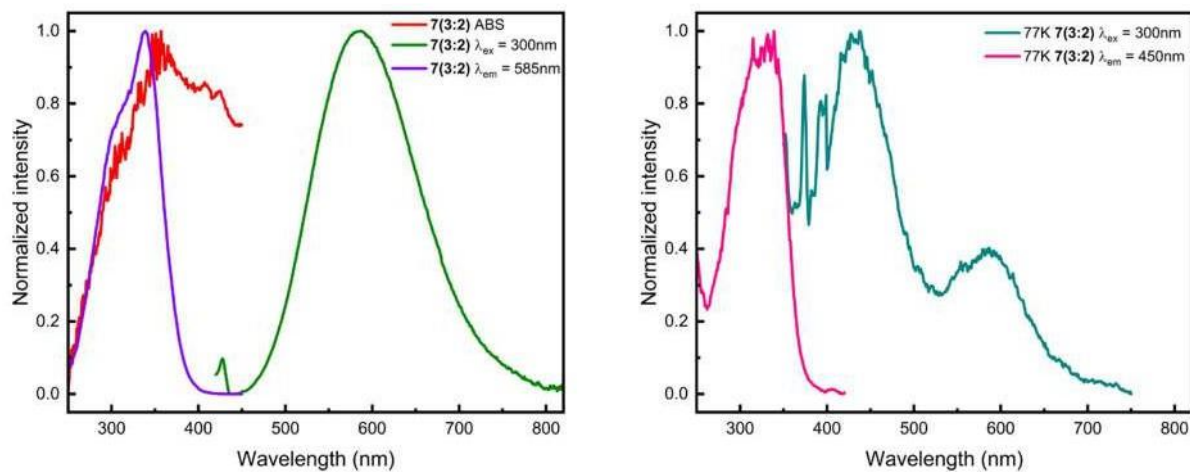

**Figure S55.** UV-Vis absorption and PL spectra of **7(3:2)**. Left : 293K. Right : 77K

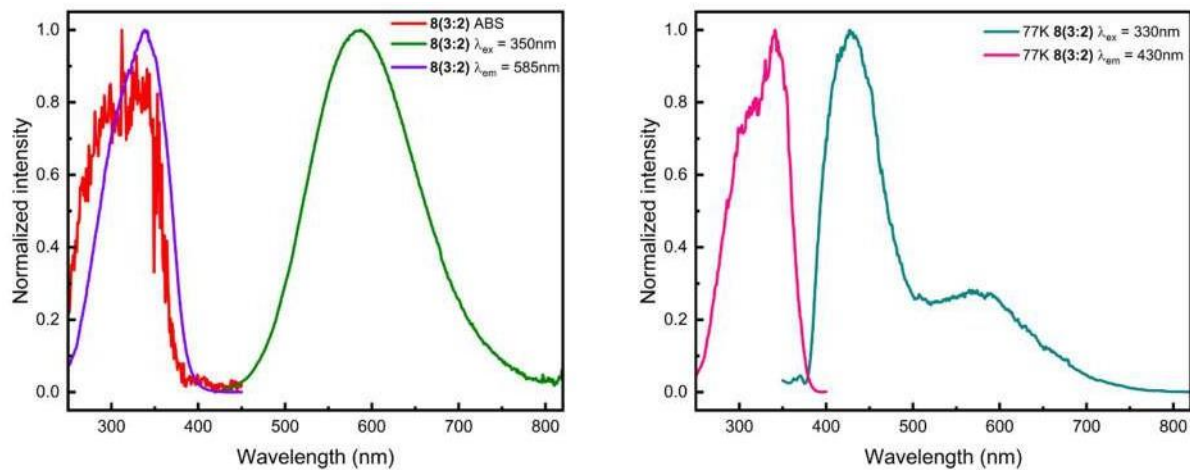

**Figure S56.** UV-Vis absorption and PL spectra of **8(3:2)**. Left : 293K. Right : 77K



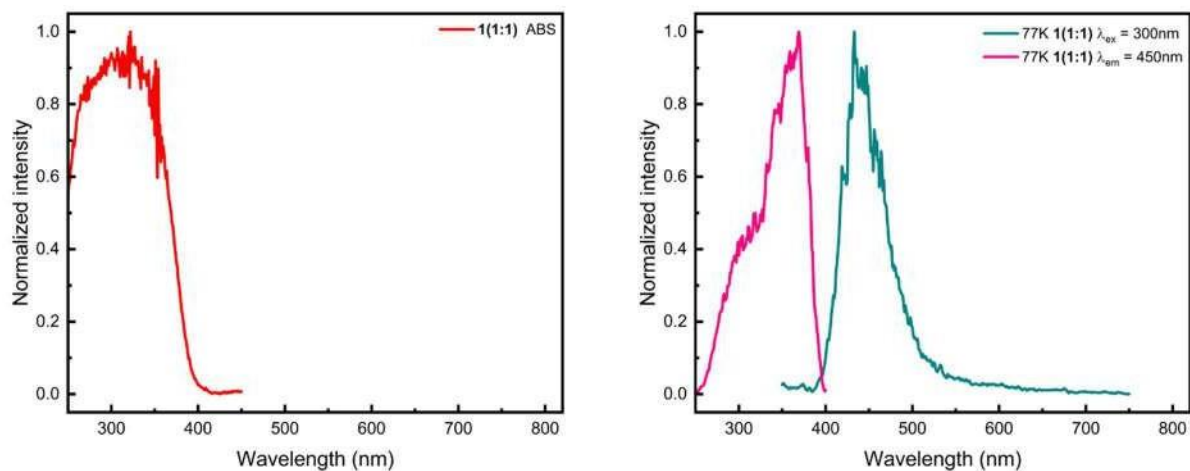

**Figure S57.** UV-Vis absorption and PL spectra of **1(1:1)**. Left : 293K. Right : 77K

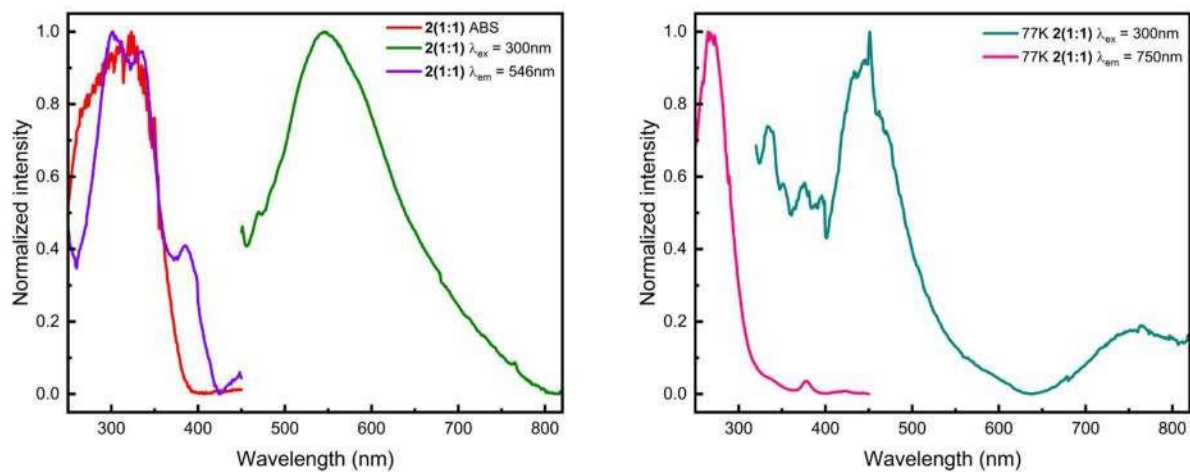

**Figure S58.** UV-Vis absorption and PL spectra of **2(1:1)**. Left : 293K. Right : 77K

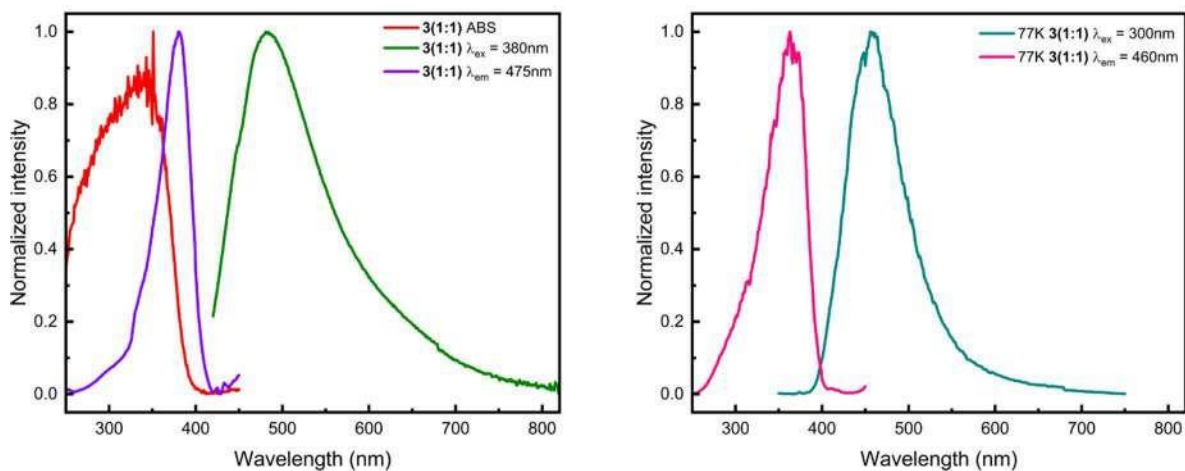

**Figure S59.** UV-Vis absorption and PL spectra of **3(1:1)**. Left : 293K. Right : 77K

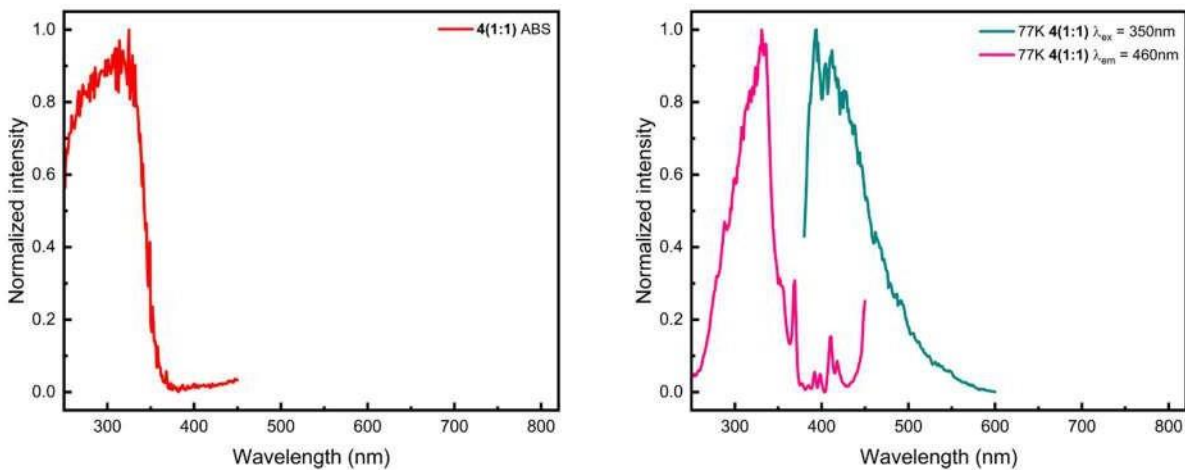

**Figure S60.** UV-Vis absorption and PL spectra of **4(1:1)**. Left : 293K. Right : 77K



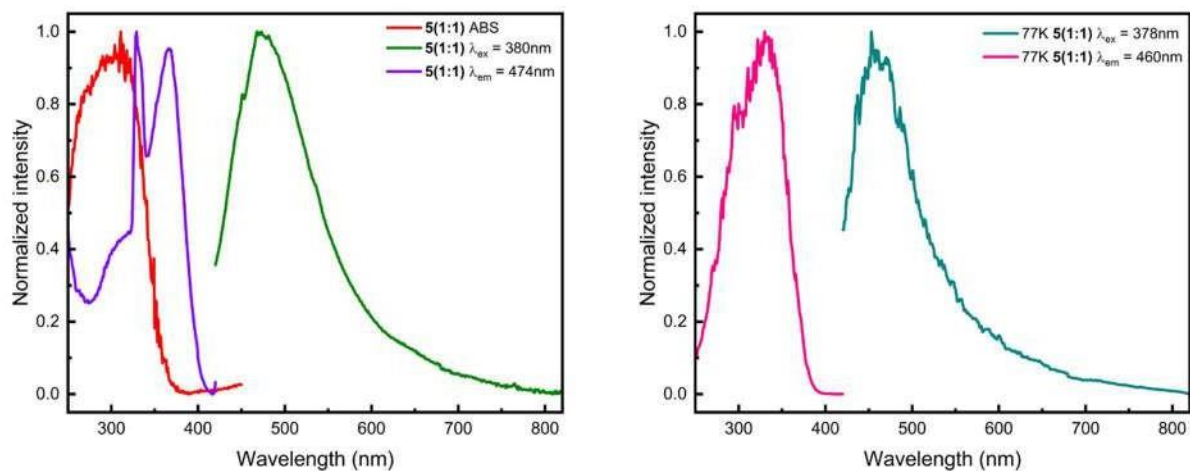

**Figure S61.** UV-Vis absorption and PL spectra of **5(1:1)**. Left : 293K. Right : 77K

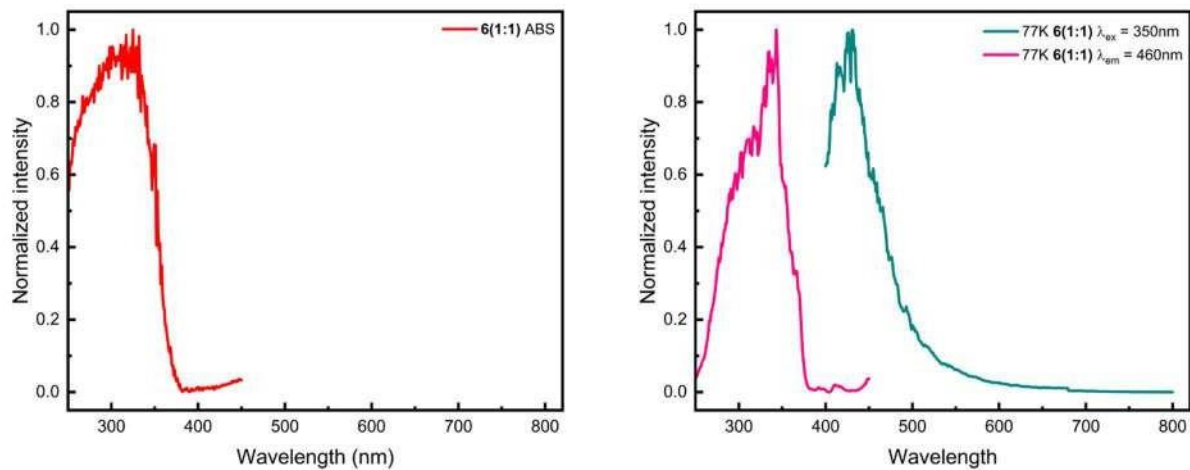

**Figure S62.** UV-Vis absorption and PL spectra of **6(1:1)**. Left : 293K. Right : 77K

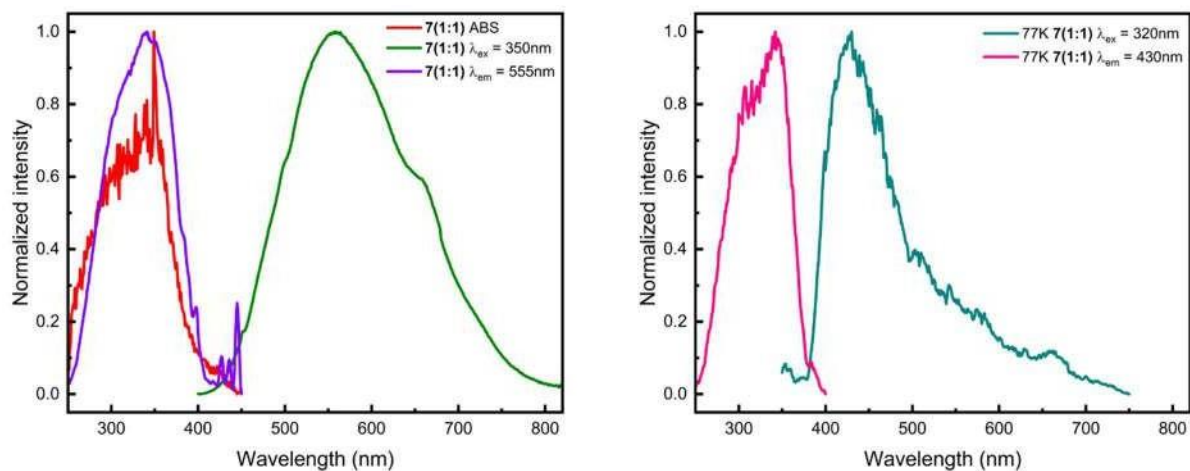

**Figure S63.** UV-Vis absorption and PL spectra of **7(1:1)**. Left : 293K. Right : 77K

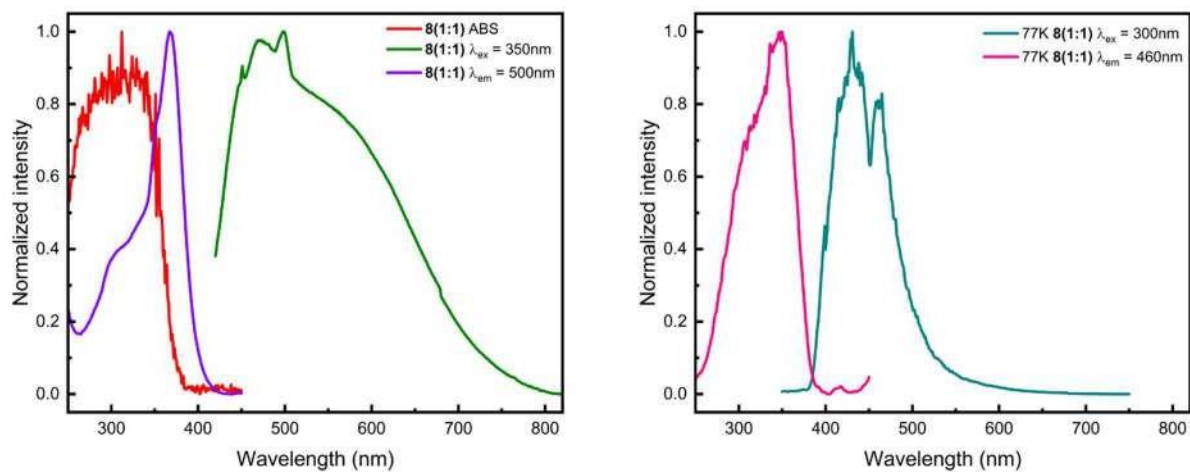

**Figure S64.** UV-Vis absorption and PL spectra of **8(1:1)**. Left : 293K. Right : 77K

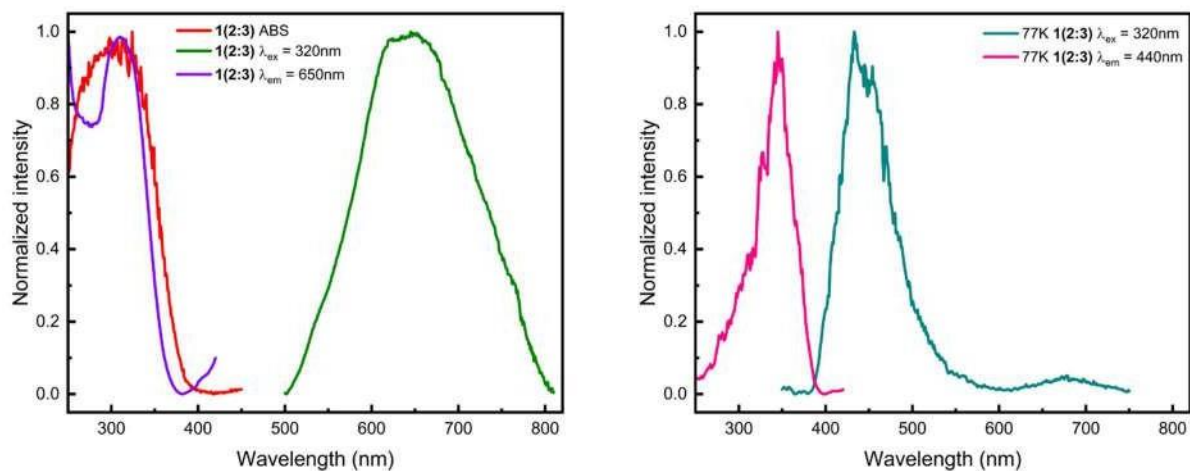

**Figure S65.** UV-Vis absorption and PL spectra of **1(2:3)**. Left : 293K. Right : 77K

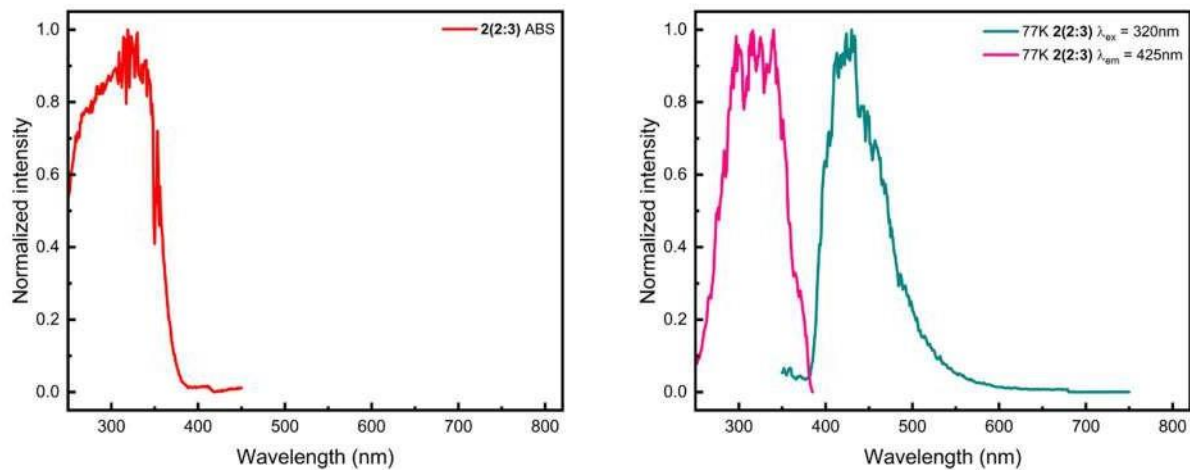

**Figure S66.** UV-Vis absorption and PL spectra of **2(2:3)**. Left : 293K. Right : 77K

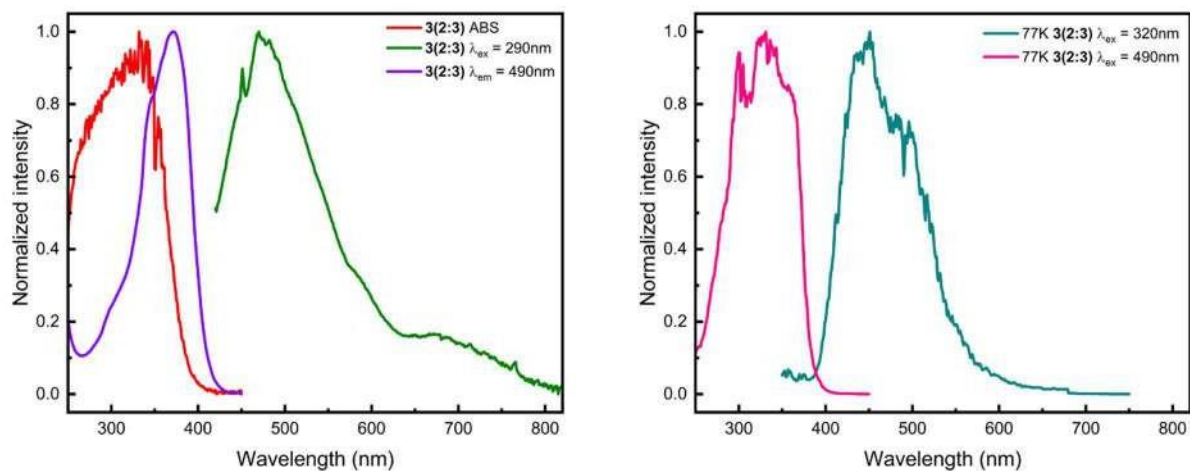

**Figure S67.** UV-Vis absorption and PL spectra of **3(2:3)**. Left : 293K. Right : 77K

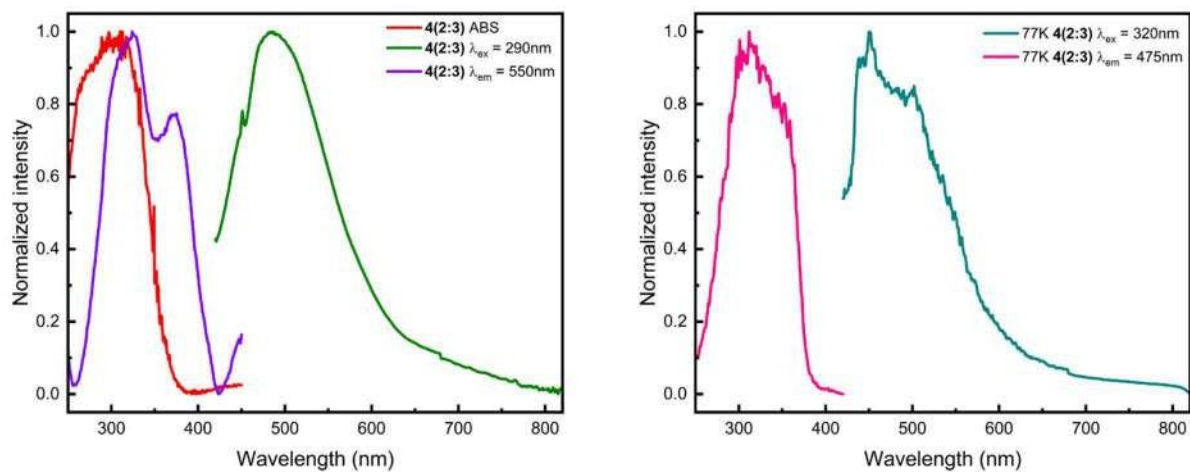

**Figure S68.** UV-Vis absorption and PL spectra of **4(2:3)**. Left : 293K. Right : 77K

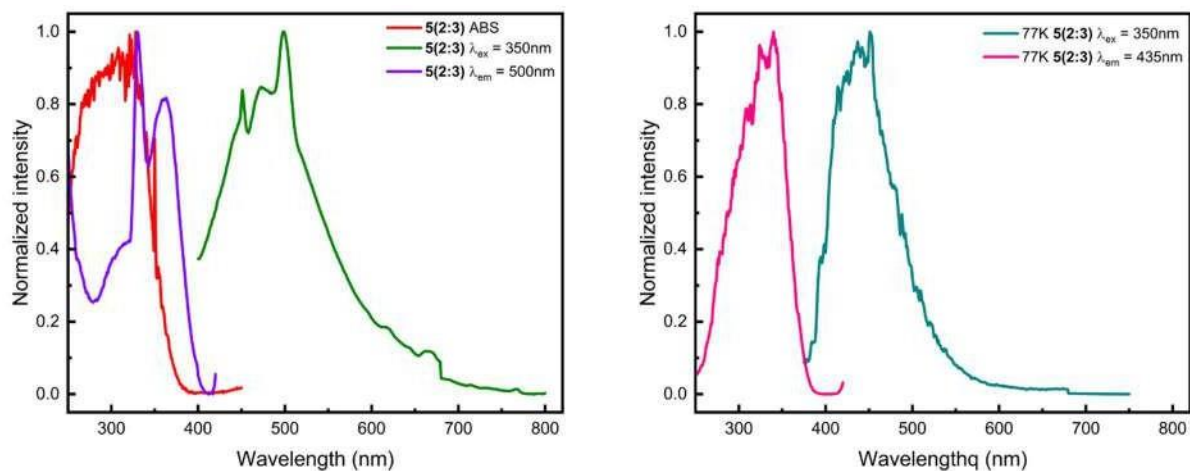

**Figure S69.** UV-Vis absorption and PL spectra of **5(2:3)**. Left : 293K. Right : 77K

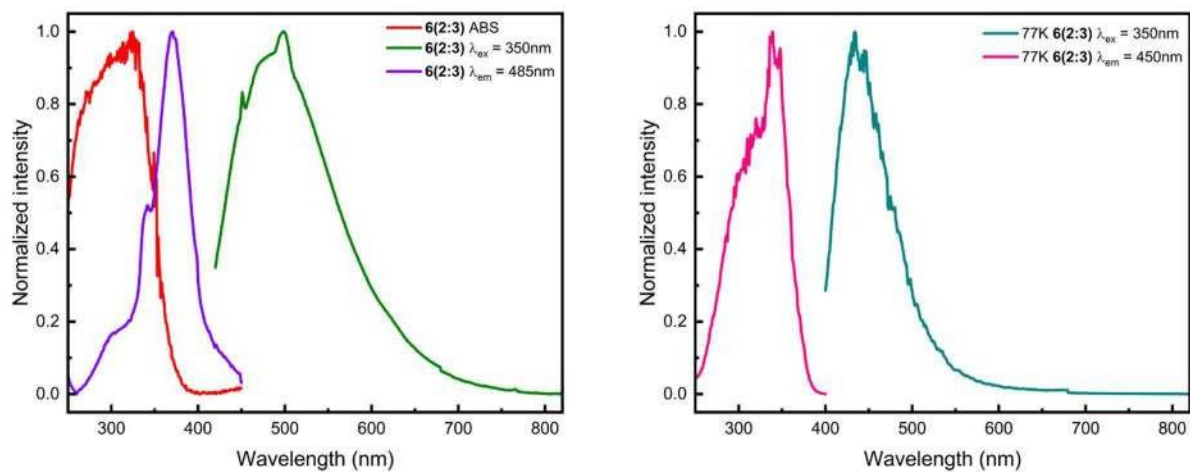

**Figure S70.** UV-Vis absorption and PL spectra of **6(2:3)**. Left : 293K. Right : 77K

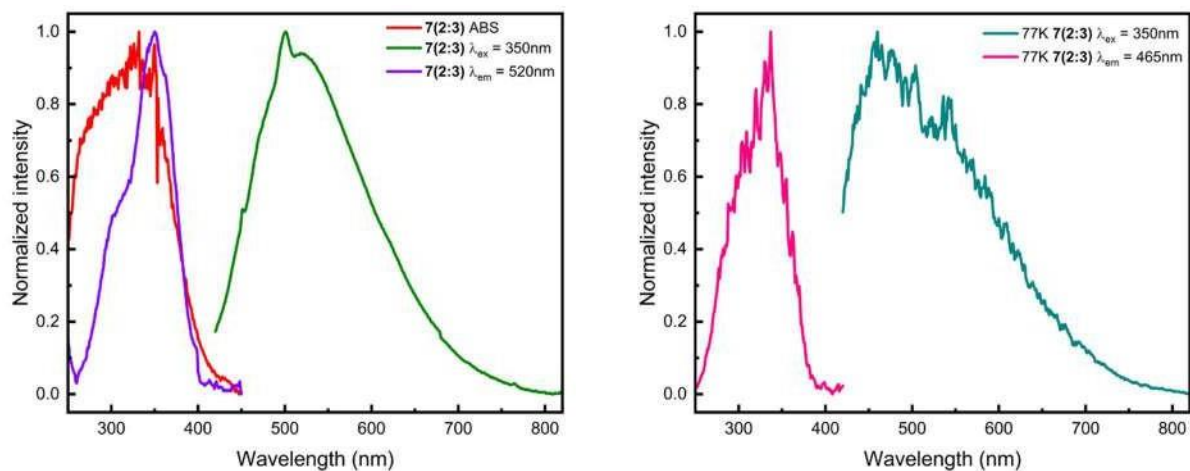

**Figure S71.** UV-Vis absorption and PL spectra of **7(2:3)**. Left : 293K. Right : 77K

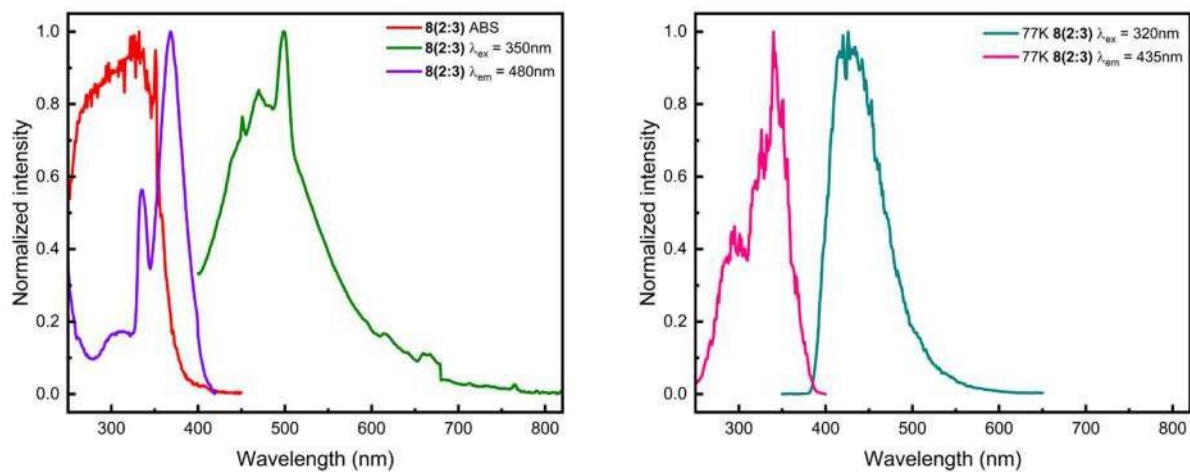

**Figure S72.** UV-Vis absorption and PL spectra of **8(2:3)**. Left : 293K. Right : 77K

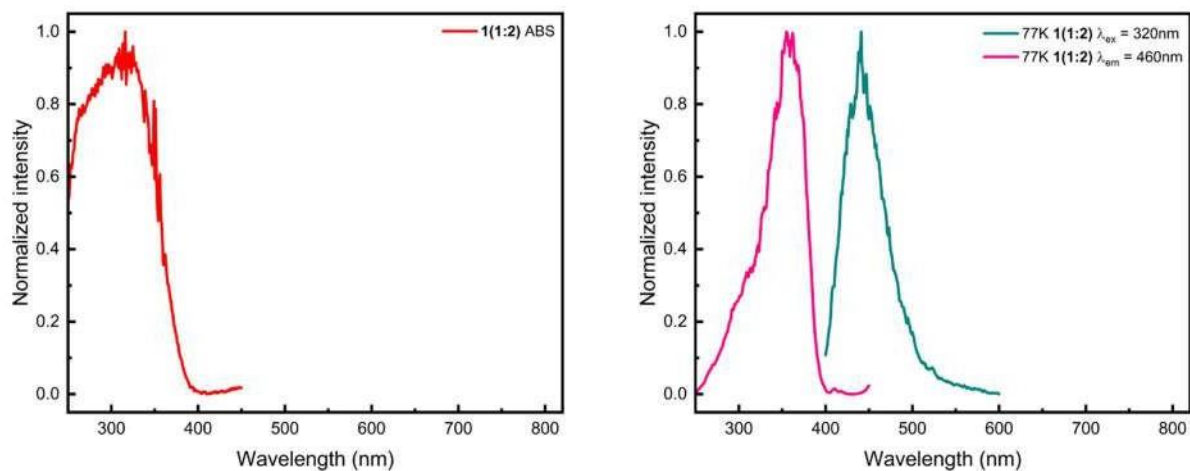

**Figure S73.** UV-Vis absorption and PL spectra of **1(1:2)**. Left : 293K. Right : 77K

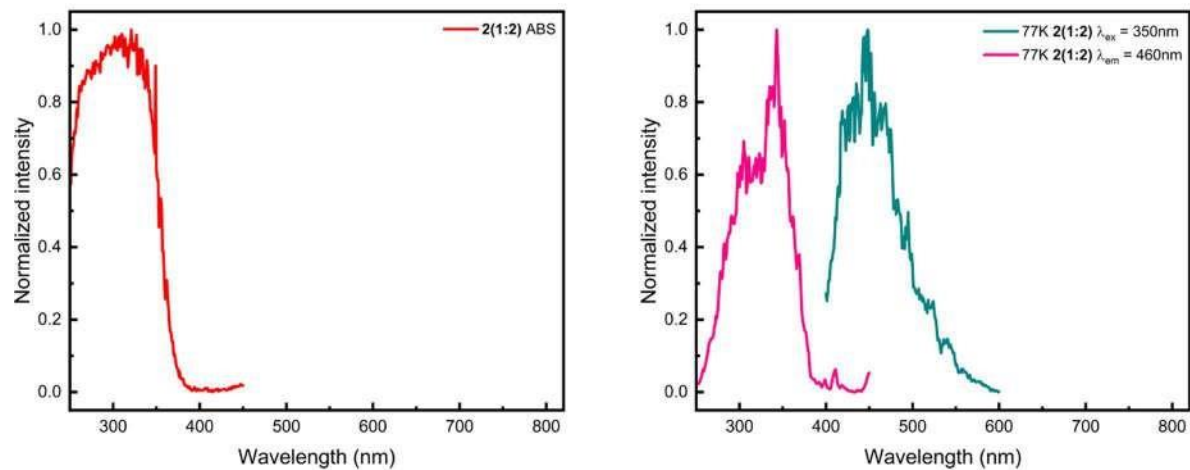

**Figure S74.** UV-Vis absorption and PL spectra of **2(1:2)**. Left : 293K. Right : 77K



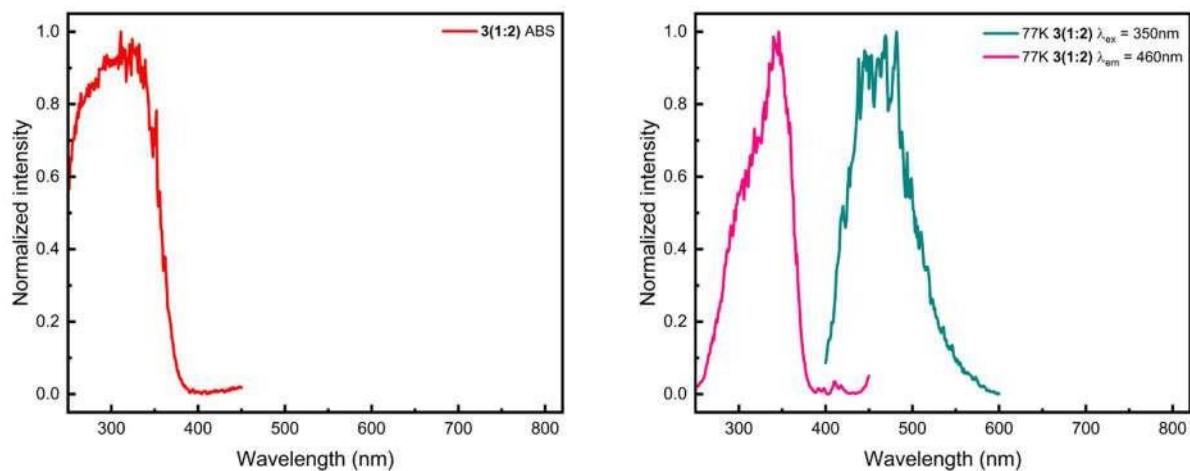

**Figure S75.** UV-Vis absorption and PL spectra of **3(1:2)**. Left : 293K. Right : 77K

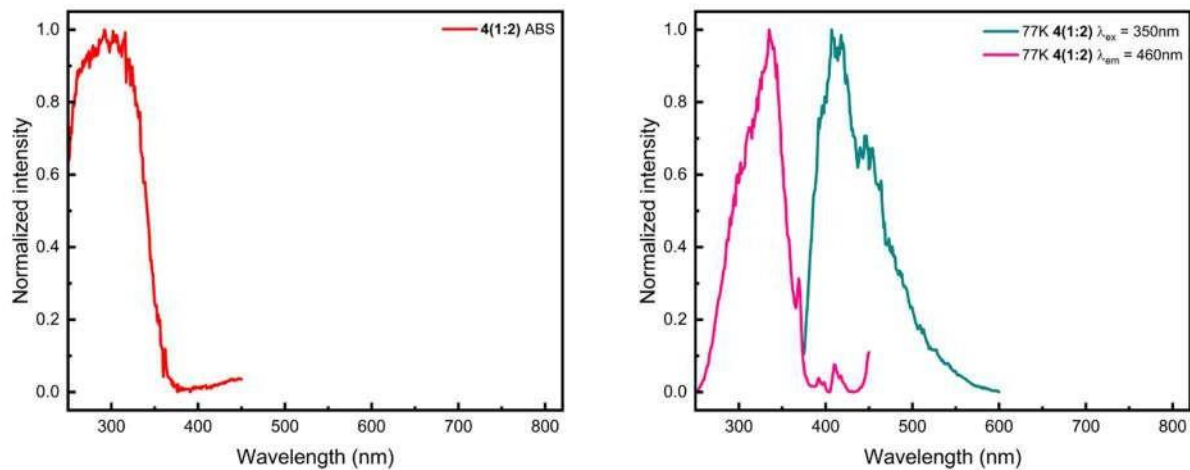

**Figure S76.** UV-Vis absorption and PL spectra of **4(1:2)**. Left : 293K. Right : 77K



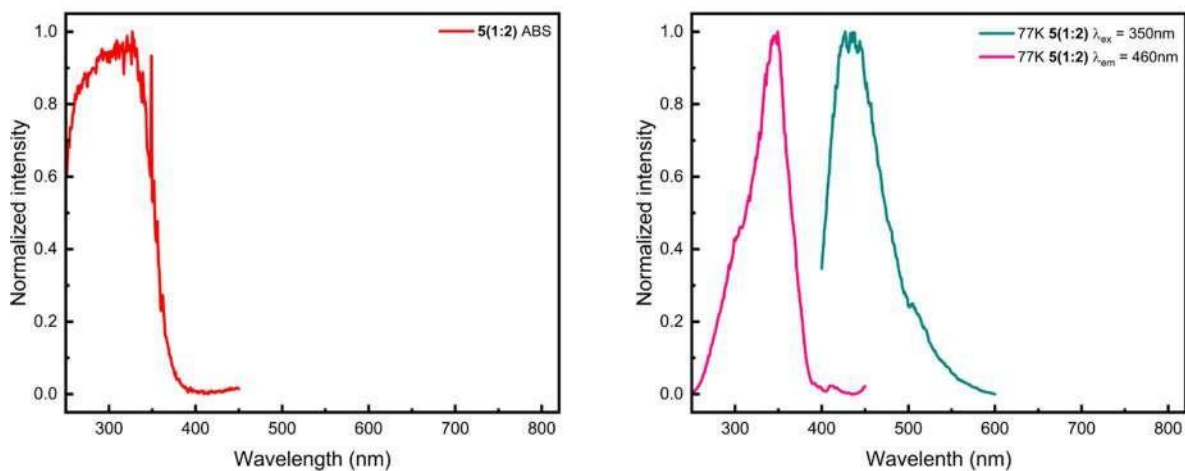

**Figure S77.** UV-Vis absorption and PL spectra of **5(1:2)**. Left : 293K. Right : 77K

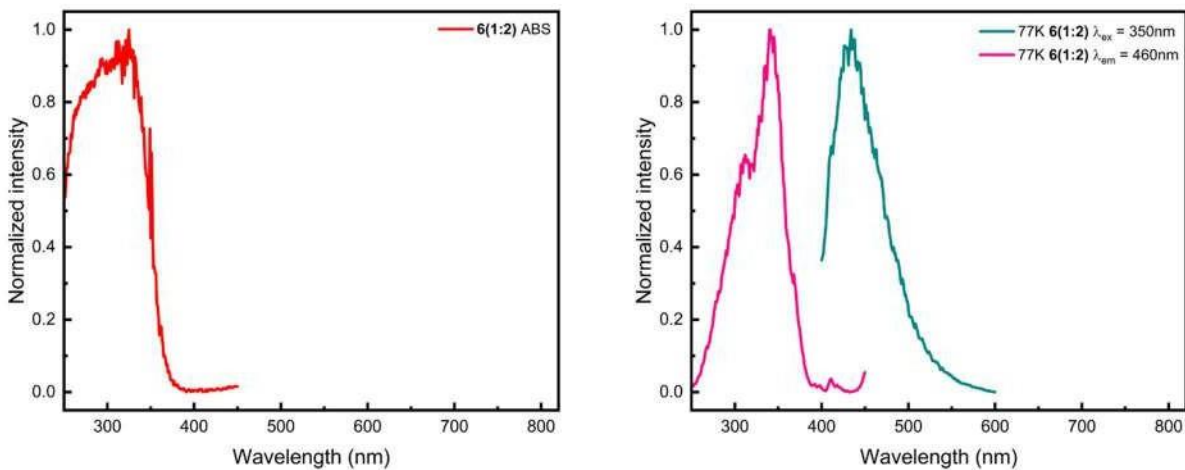

**Figure S78.** UV-Vis absorption and PL spectra of **6(1:2)**. Left : 293K. Right : 77K

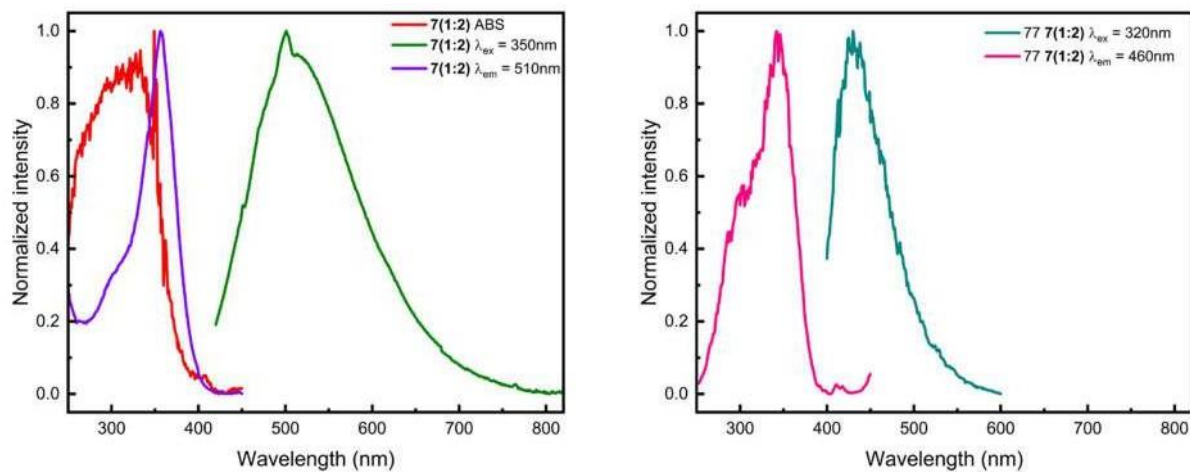

**Figure S79.** UV-Vis absorption and PL spectra of **7(1:2)**. Left : 293K. Right : 77K

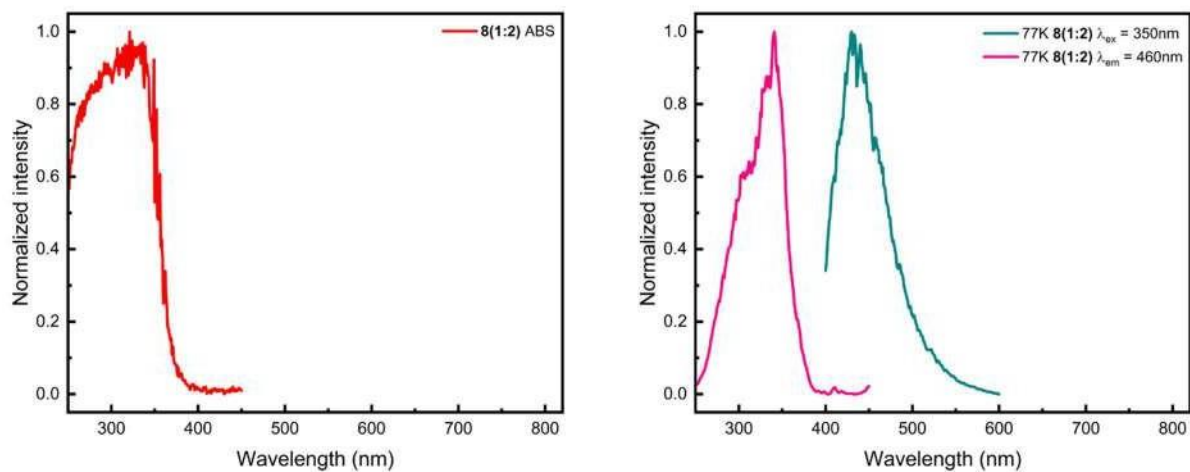

**Figure S80.** UV-Vis absorption and PL spectra of **8(1:2)**. Left : 293K. Right : 77K

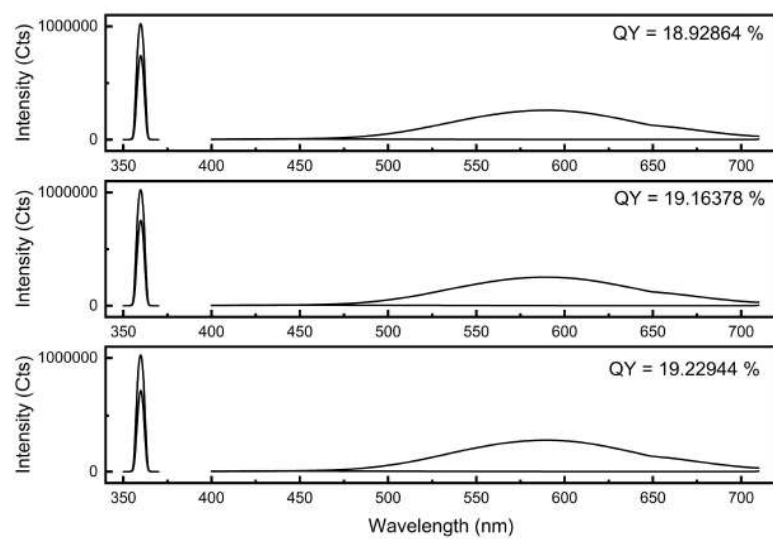

**Figure S81.** Photoluminescence and quantum yield of **1(2:1)**.

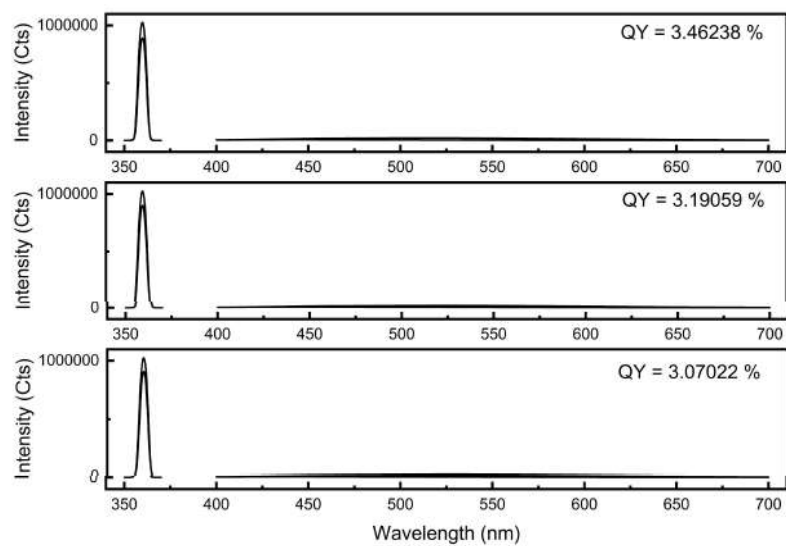

**Figure S82.** Photoluminescence and quantum yield of **2(2:1)**.

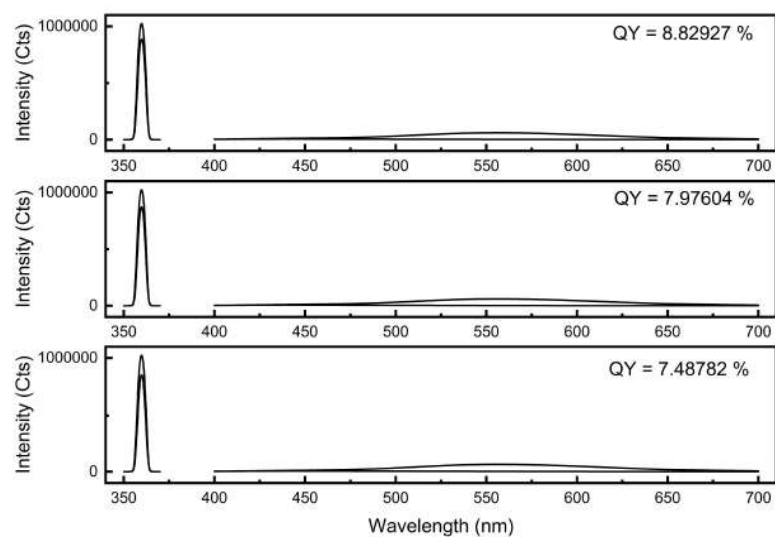

**Figure S83.** Photoluminescence and quantum yield of **3(2:1)**.

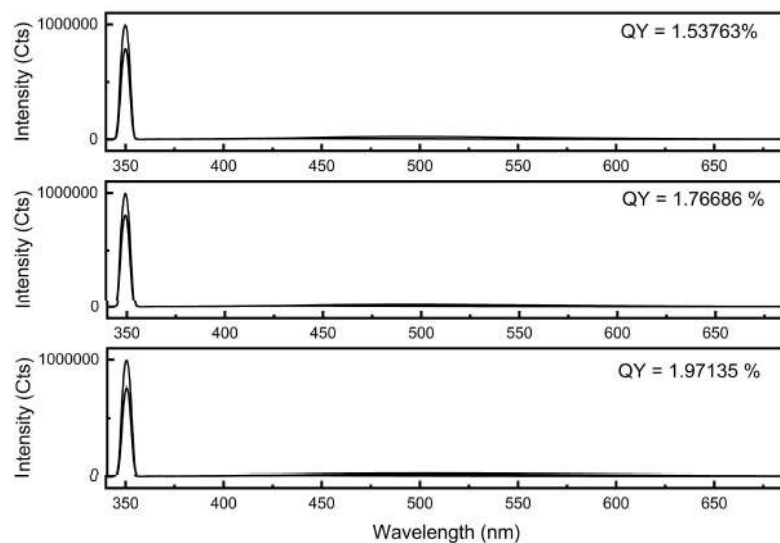

**Figure S84.** Photoluminescence and quantum yield of **4(2:1)**.

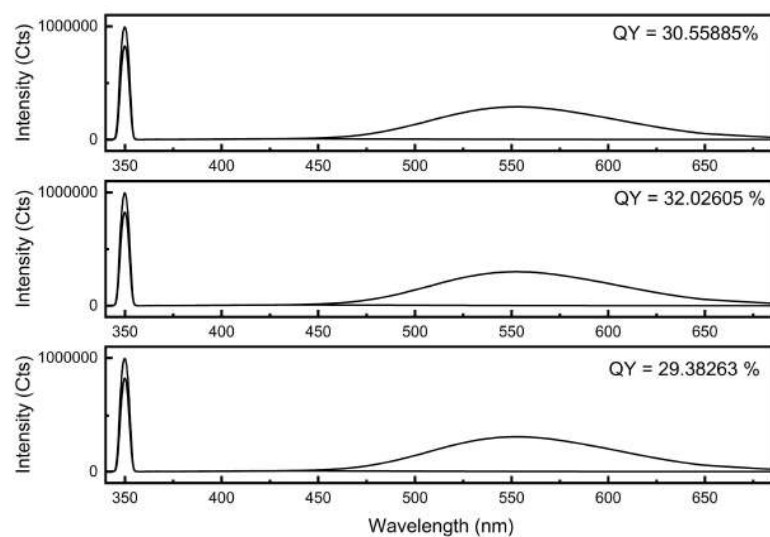

**Figure S85.** Photoluminescence and quantum yield of **5(2:1)**.

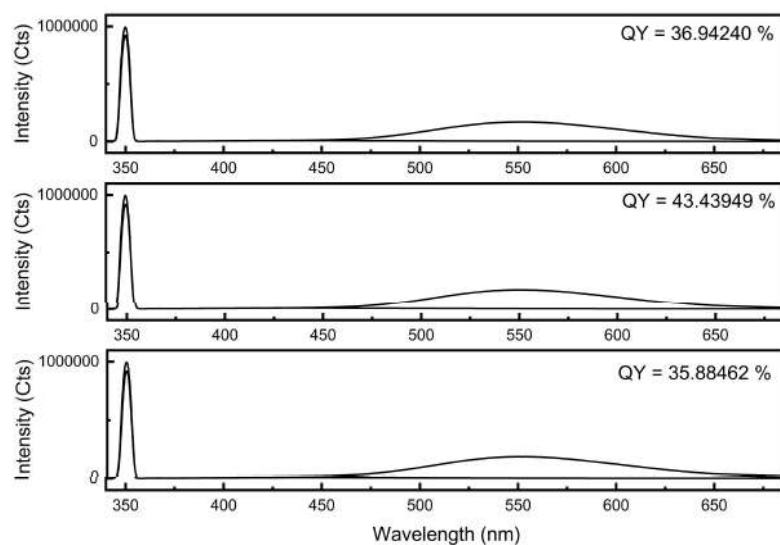

**Figure S86.** Photoluminescence and quantum yield of **6(2:1)**.

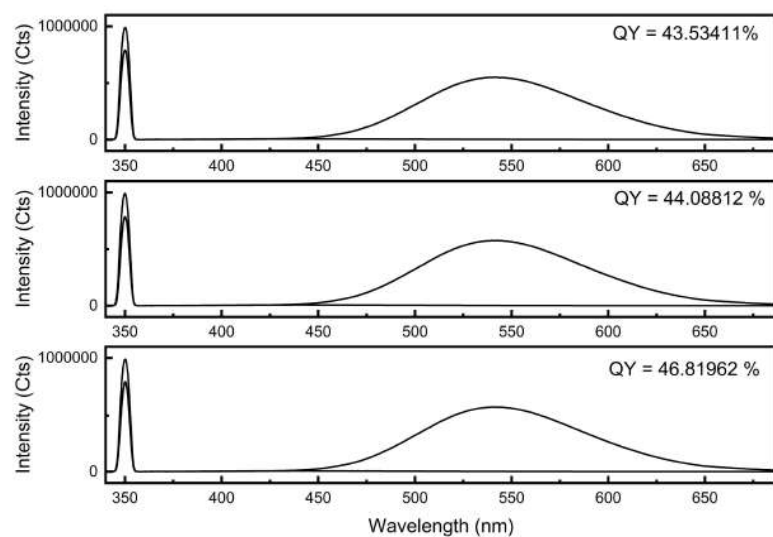

**Figure S87.** Photoluminescence and quantum yield of **7(2:1)**.

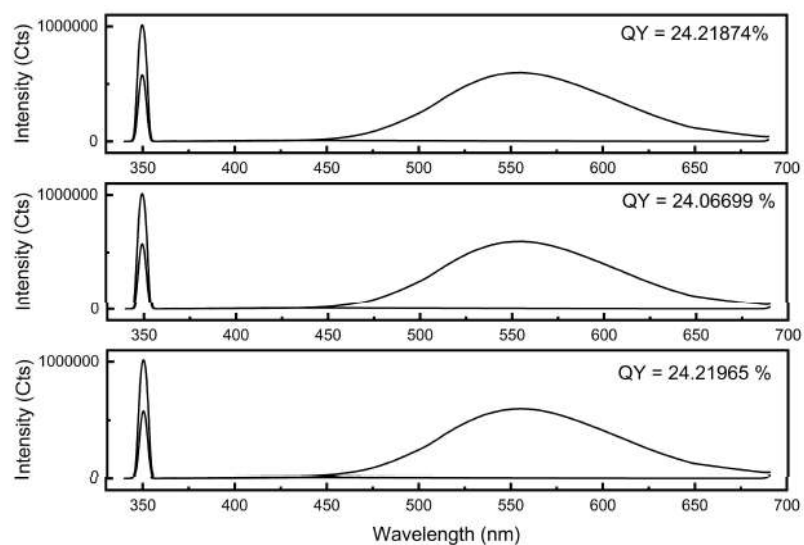

**Figure S88.** Photoluminescence and quantum yield of **8(2:1)**.

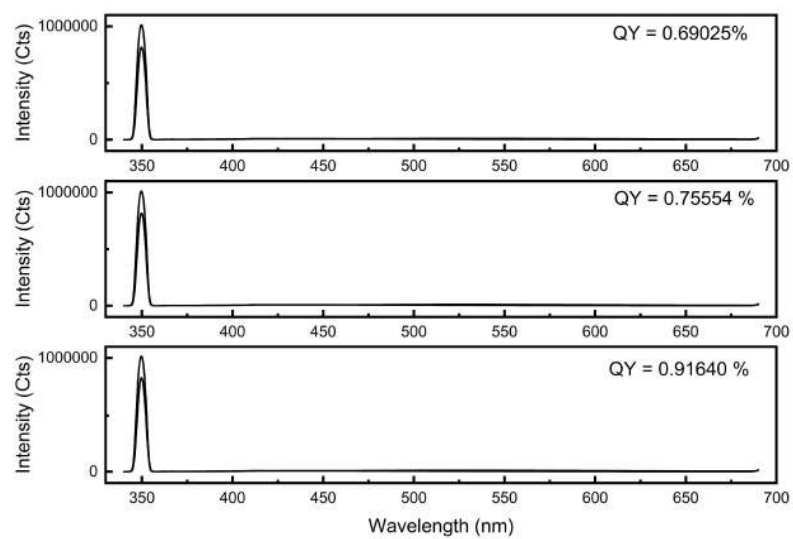

**Figure S89.** Photoluminescence and quantum yield of 1(3:2).

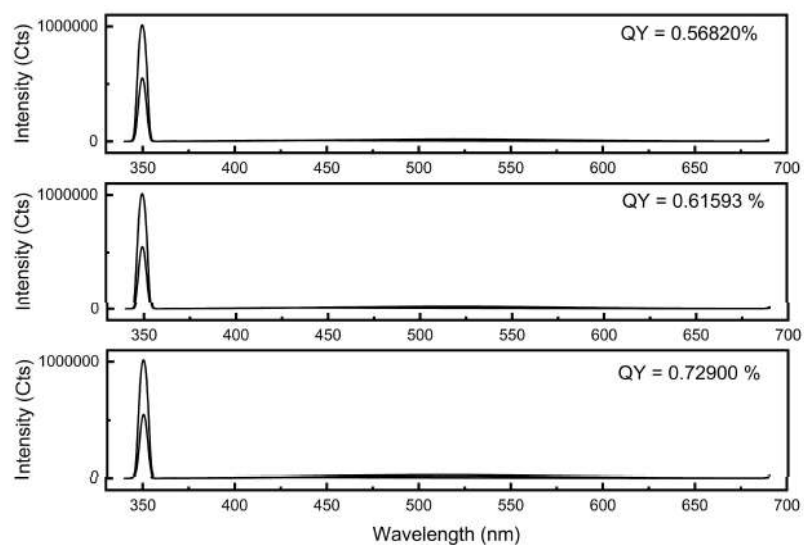

**Figure S90.** Photoluminescence and quantum yield of 2(3:2).

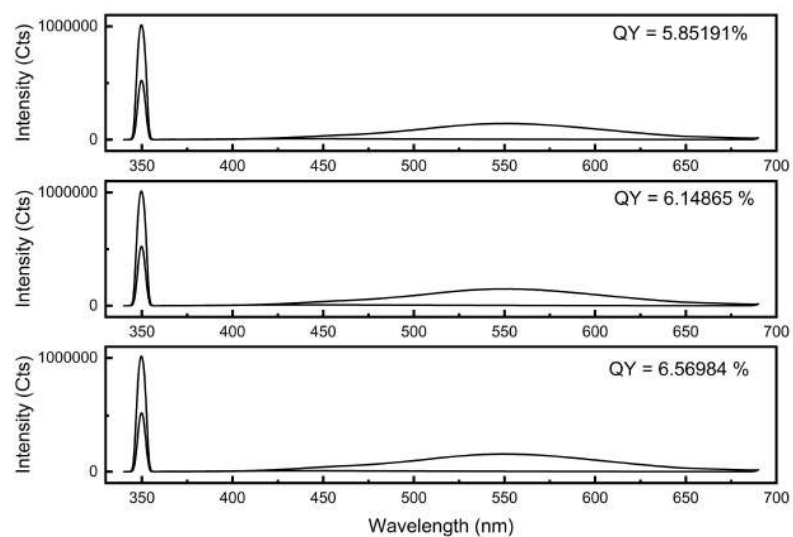

**Figure S91.** Photoluminescence and quantum yield of **3(3:2)**.

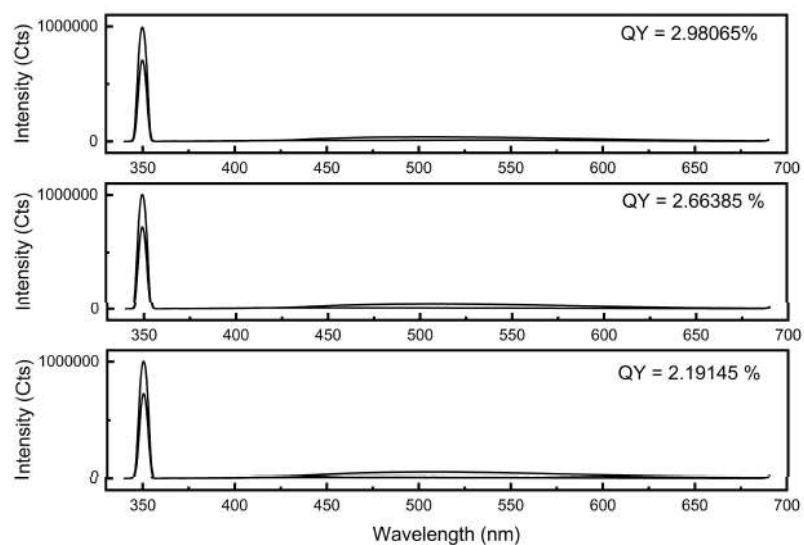

**Figure S92.** Photoluminescence and quantum yield of **4(3:2)**.



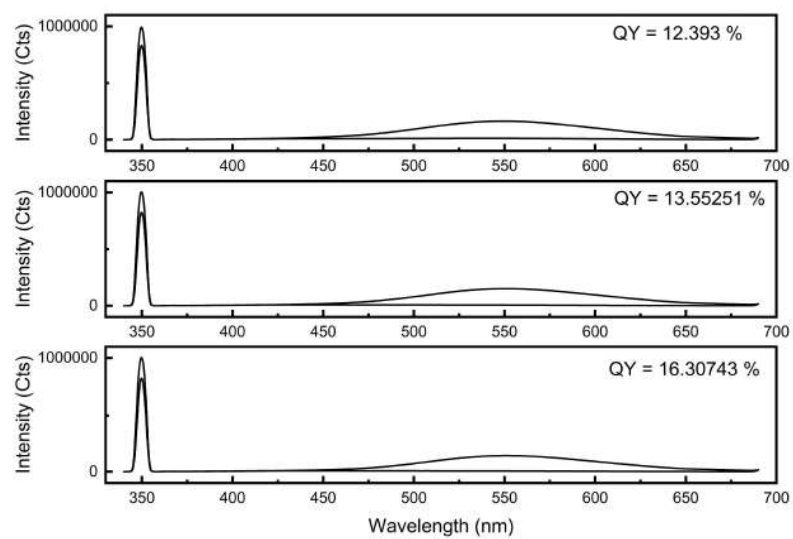

**Figure S93.** Photoluminescence and quantum yield of **5(3:2)**.

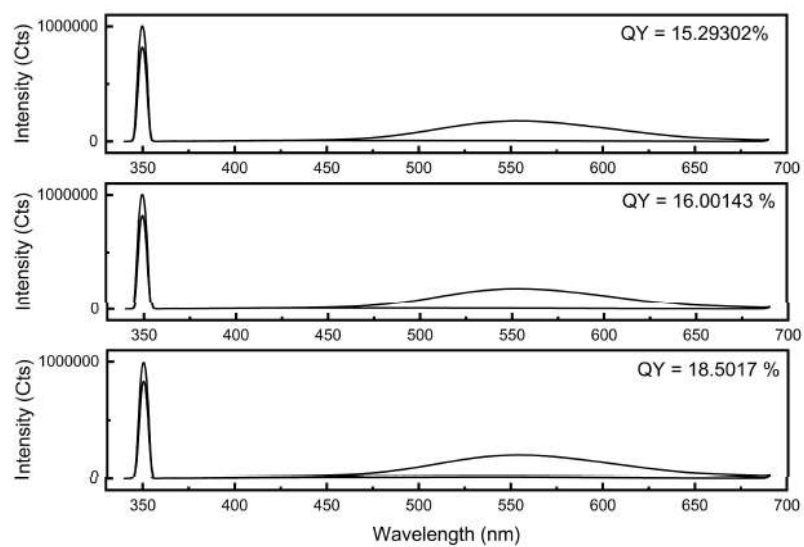

**Figure S94.** Photoluminescence and quantum yield of **6(3:2)**.

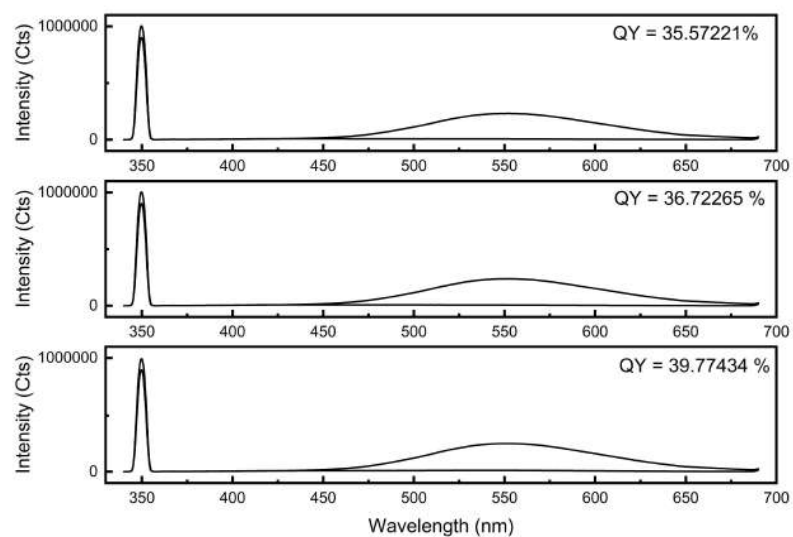

**Figure S95.** Photoluminescence and quantum yield of **7(3:2)**.

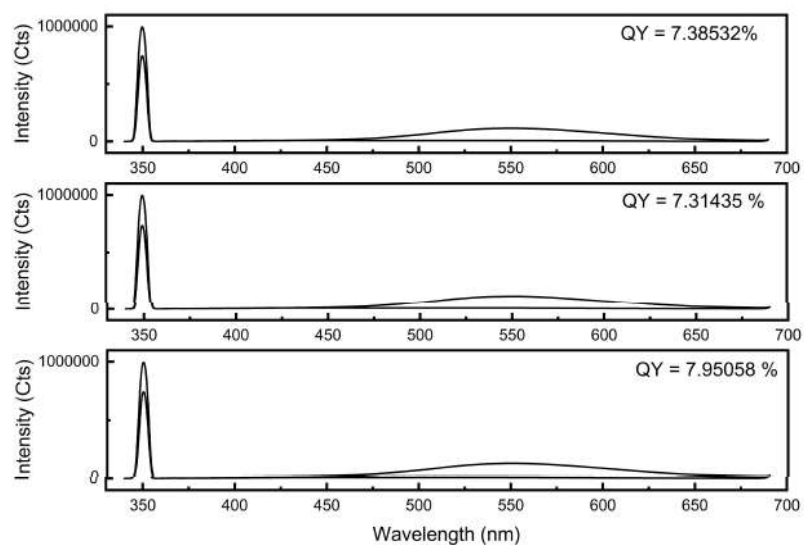

**Figure S96.** Photoluminescence and quantum yield of **8(3:2)**.

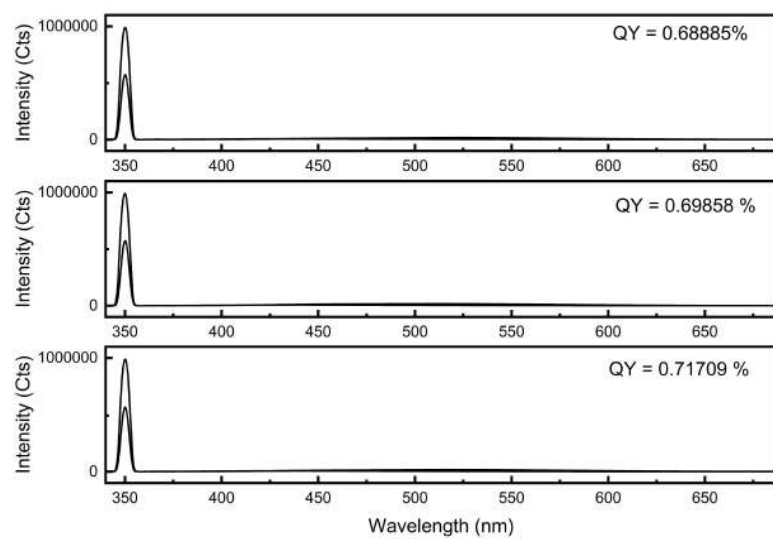

**Figure S97.** Photoluminescence and quantum yield of **2(1:1)**.

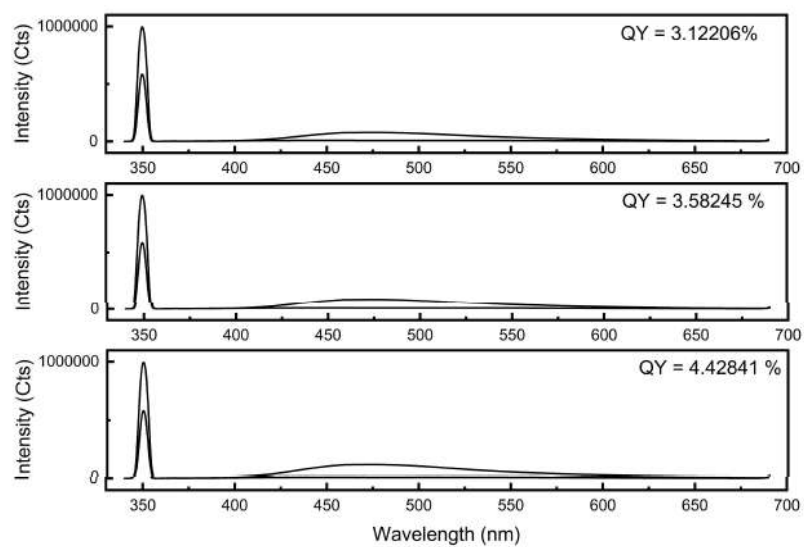

**Figure S98.** Photoluminescence and quantum yield of **3(1:1)**.

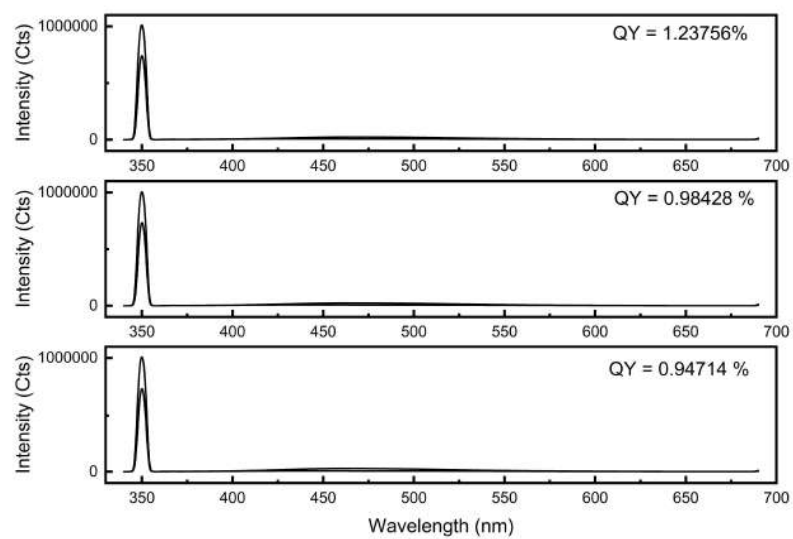

**Figure S99.** Photoluminescence and quantum yield of **5(1:1)**.

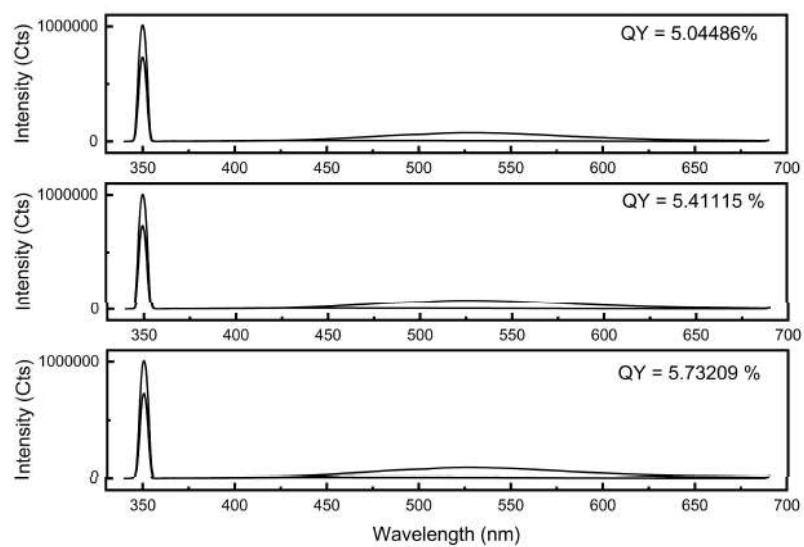

**Figure S100.** Photoluminescence and quantum yield of **7(1:1)**.

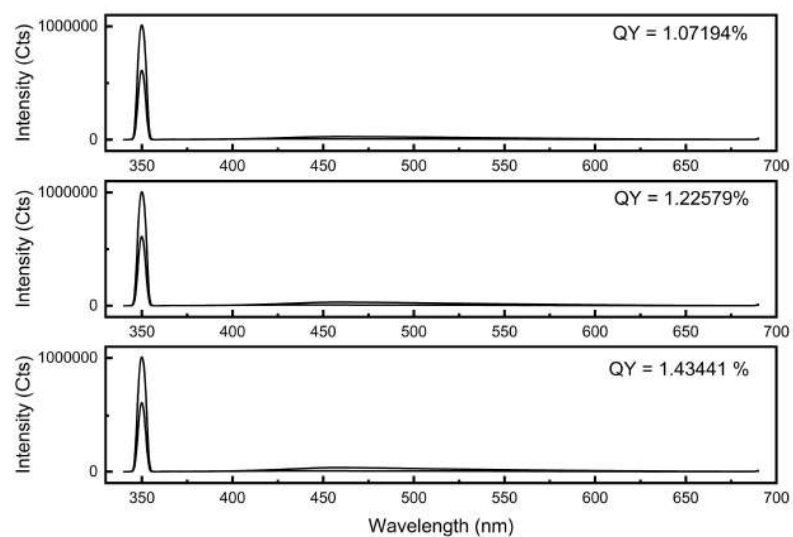

**Figure S101.** Photoluminescence and quantum yield of **8(1:1)**.

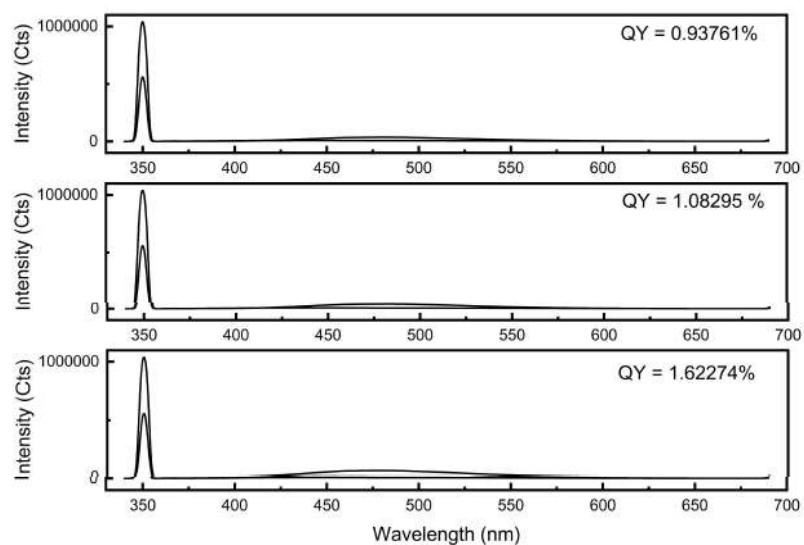

**Figure S102.** Photoluminescence and quantum yield of **3(2:3)**.

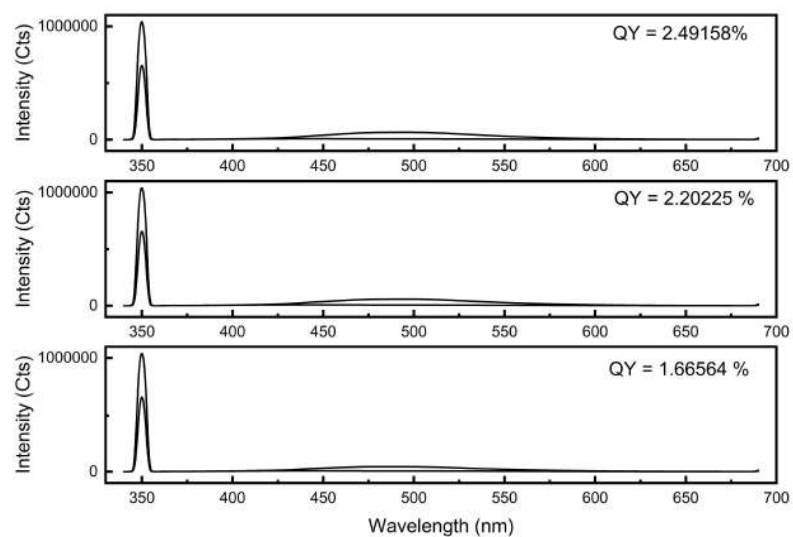

**Figure S103.** Photoluminescence and quantum yield of **4(2:3)**.

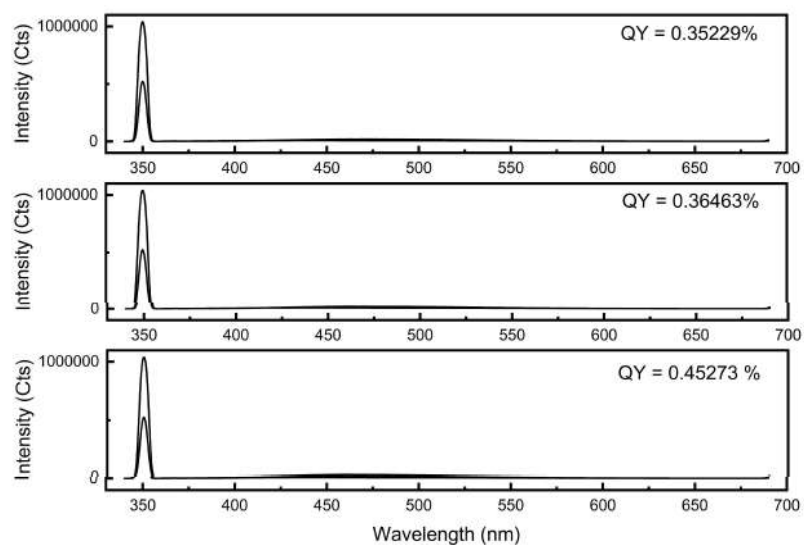

**Figure S104.** Photoluminescence and quantum yield of **5(2:3)**.

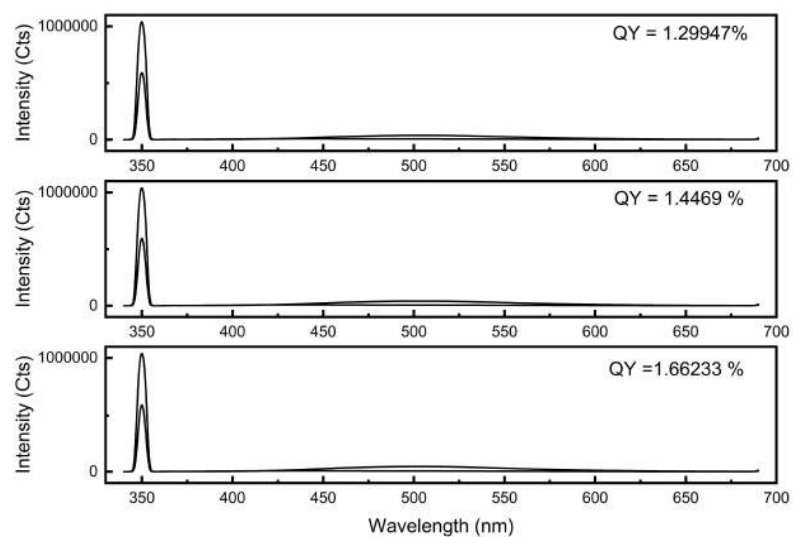

**Figure S105.** Photoluminescence and quantum yield of **7(2:3)**.

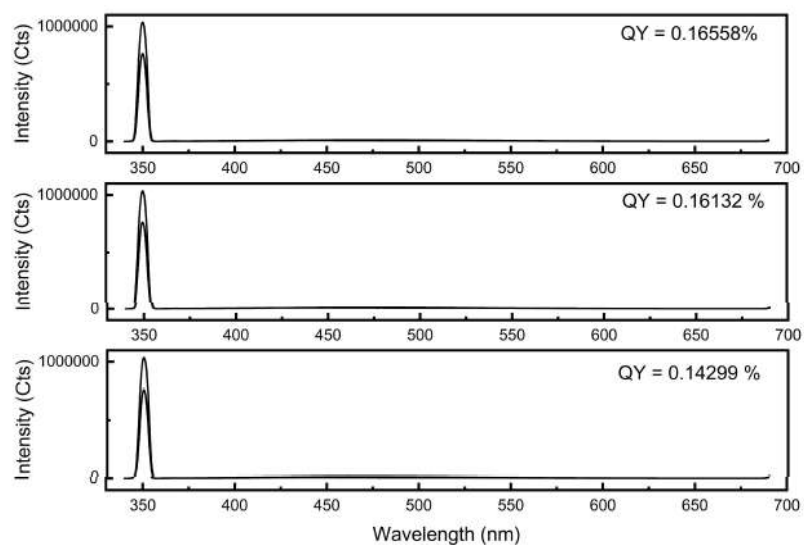

**Figure S106.** Photoluminescence and quantum yield of **8(2:3)**.

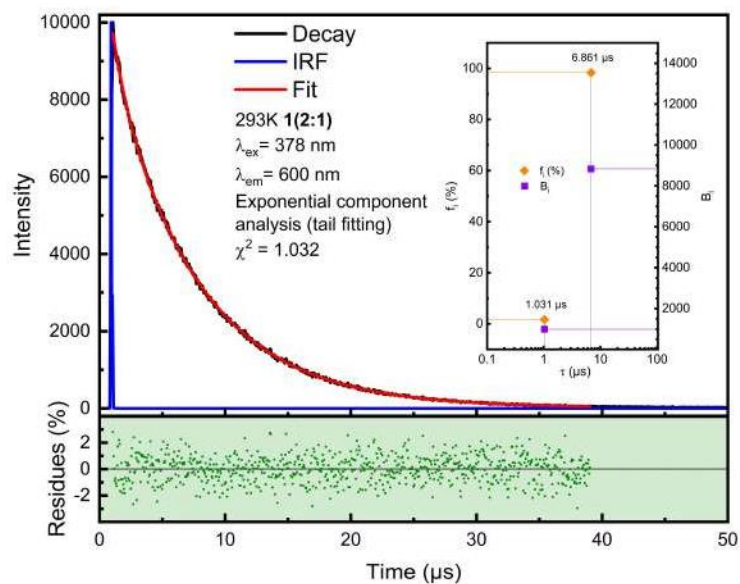

**Figure S107.** PL decay of 1(2:1) at 293K.

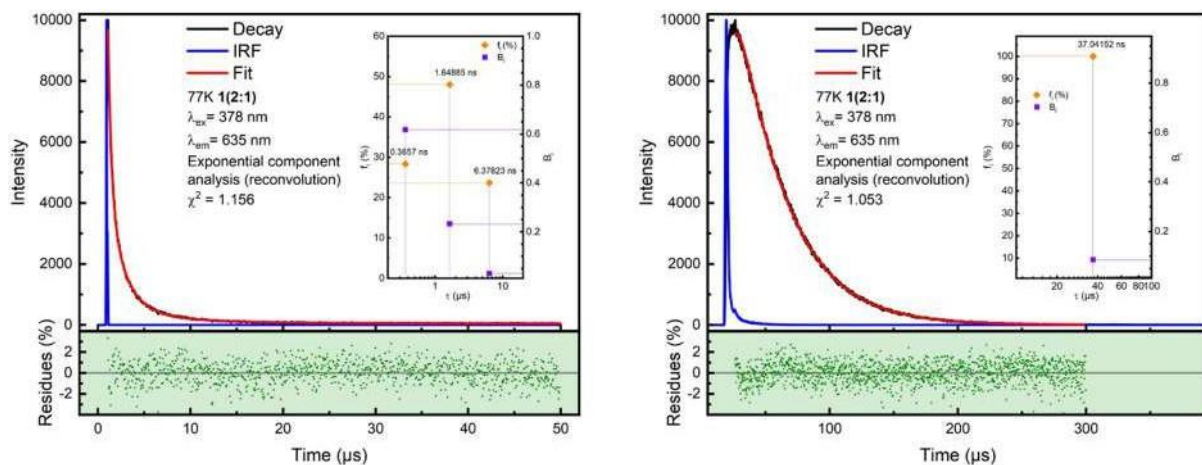

**Figure S108.** PL decay of 1(2:1) at 77K. Left : short lifetimes. Right : long lifetimes.



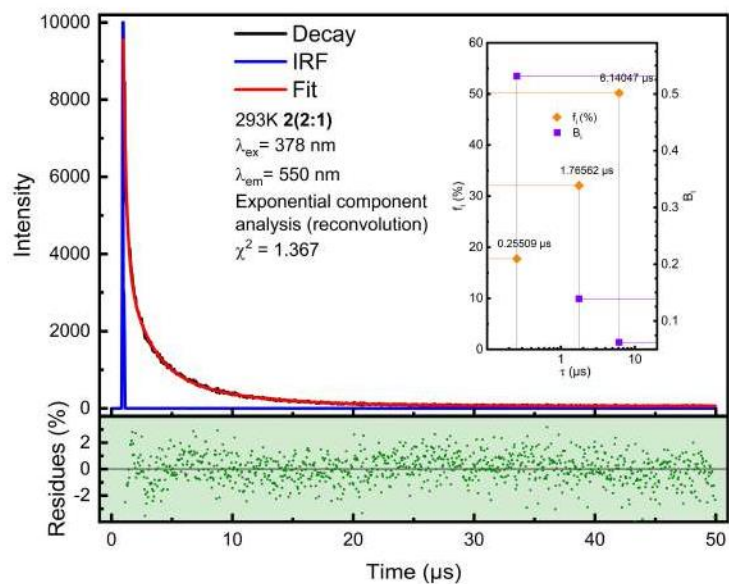

**Figure S109.** PL decay of **2(2:1)** at 293K.

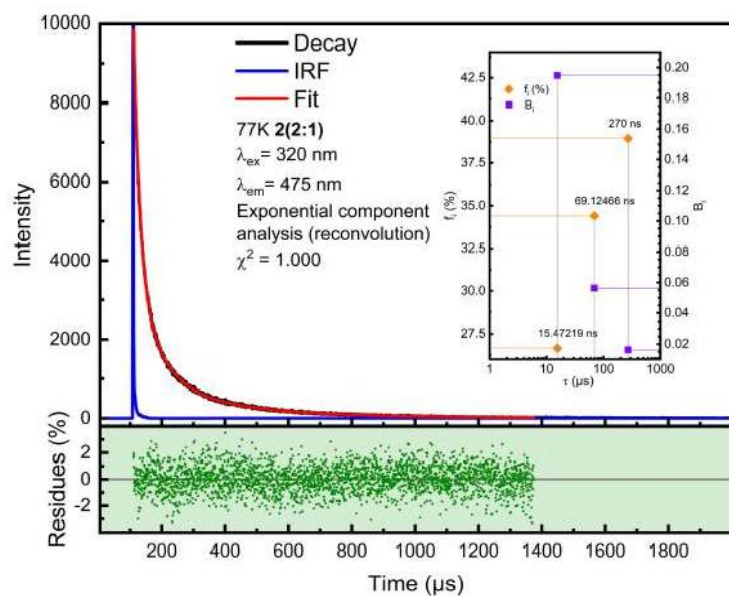

**Figure S110.** PL decay of **2(2:1)** at 77K.

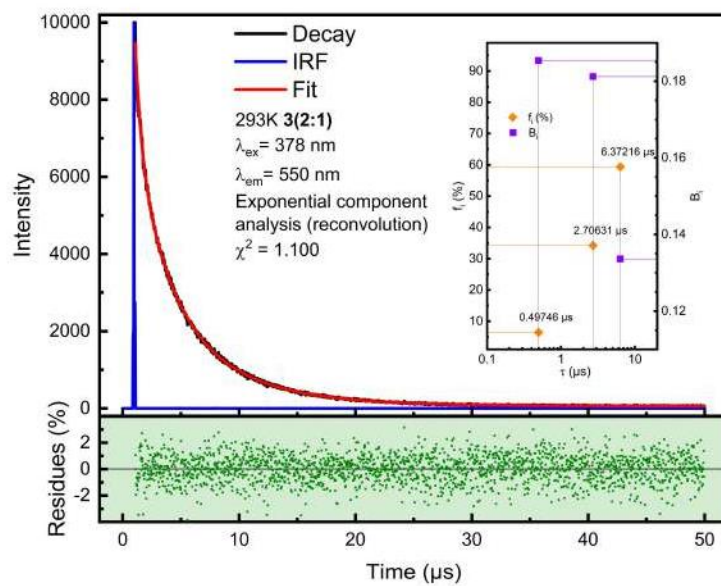

**Figure S111.** PL decay of **3(2:1)** at 293K.

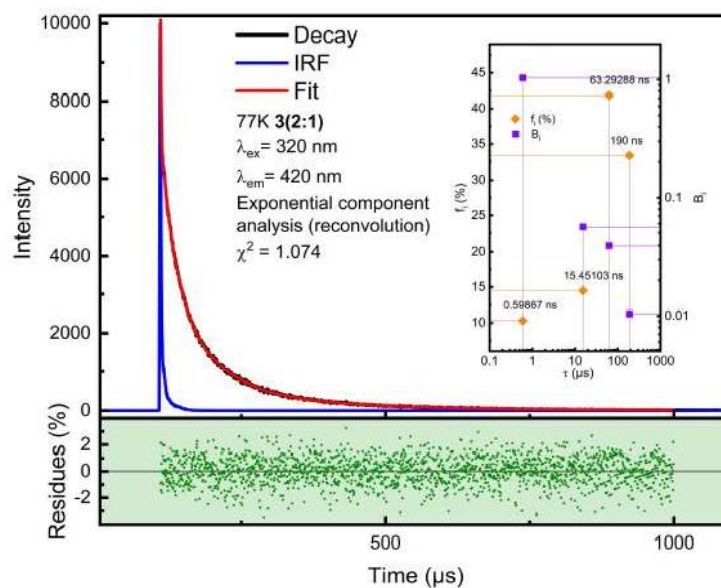

**Figure S112.** PL decay of **3(2:1)** at 77K.

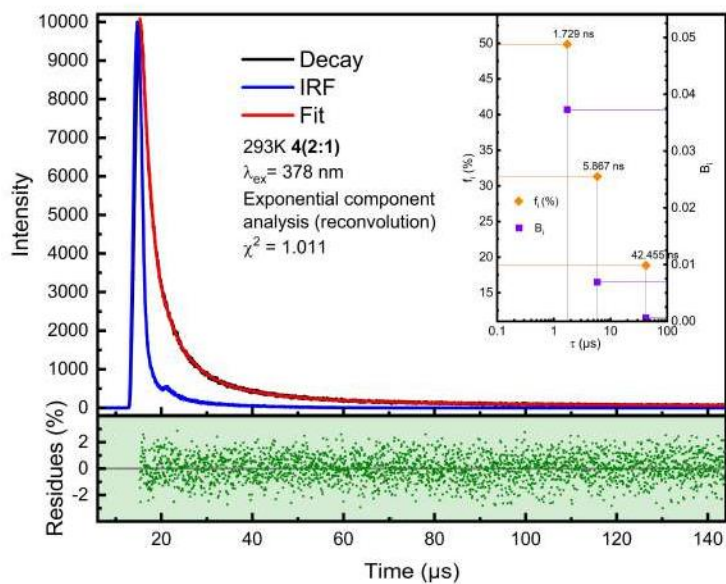

**Figure S113.** PL decay of **4(2:1)** at 293K.

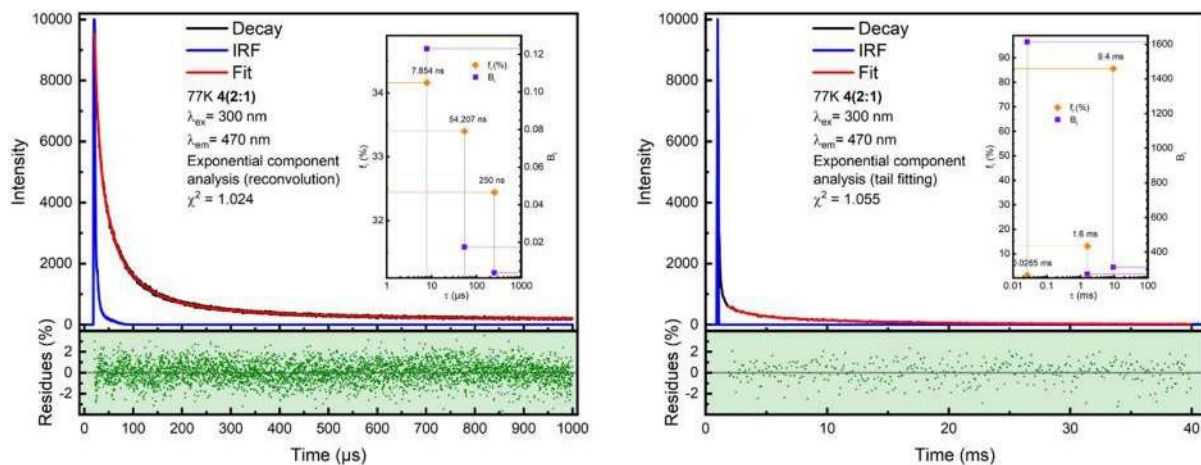

**Figure S114.** PL decay of **4(2:1)** at 77K. Left : short lifetimes. Right : long lifetimes.

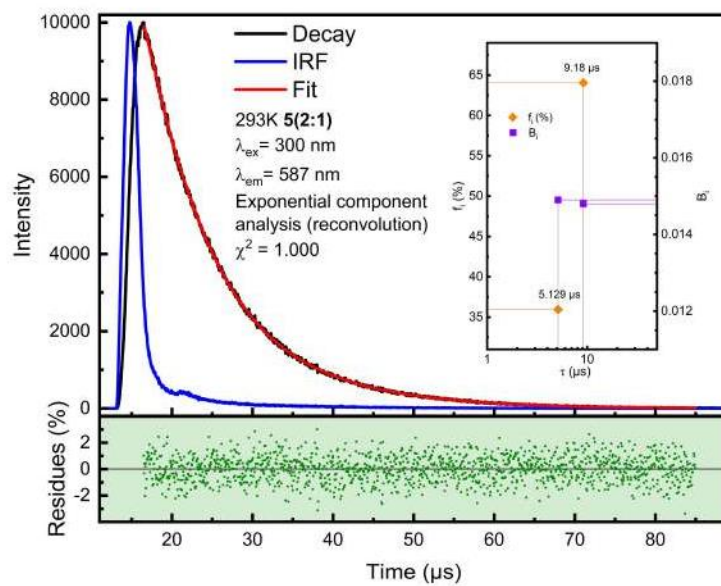

**Figure S115.** PL decay of **5(2:1)** at 293K.

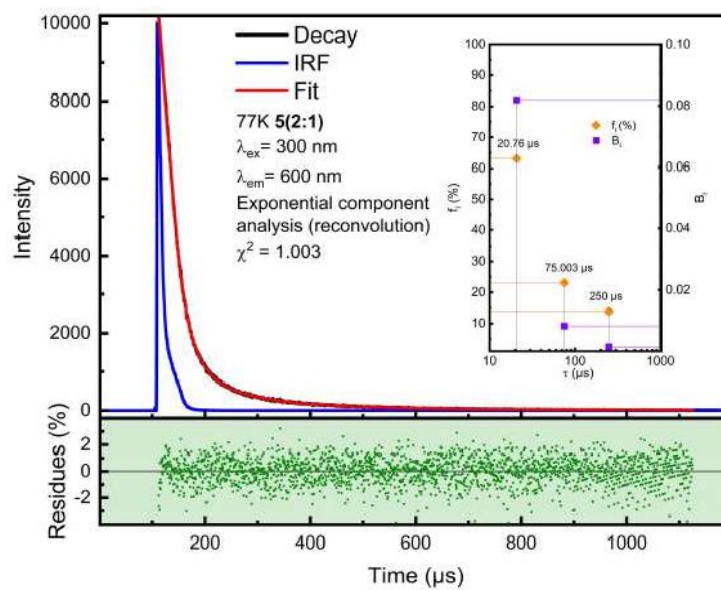

**Figure S116.** PL decay of **5(2:1)** at 77K.

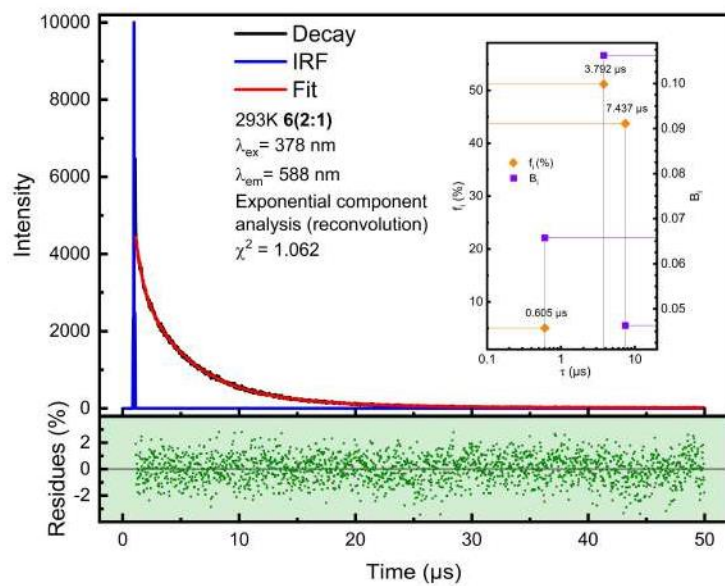

**Figure S117.** PL decay of **6(2:1)** at 293K.

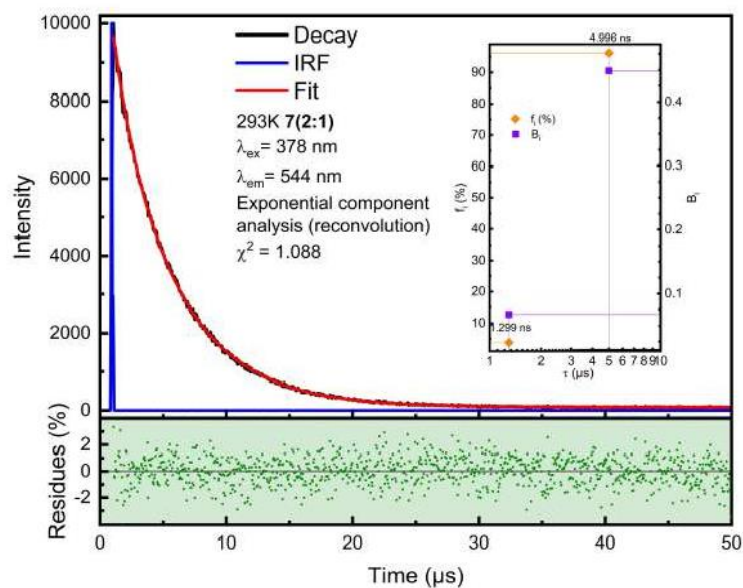

**Figure S118.** PL decay of **7(2:1)** at 293K.



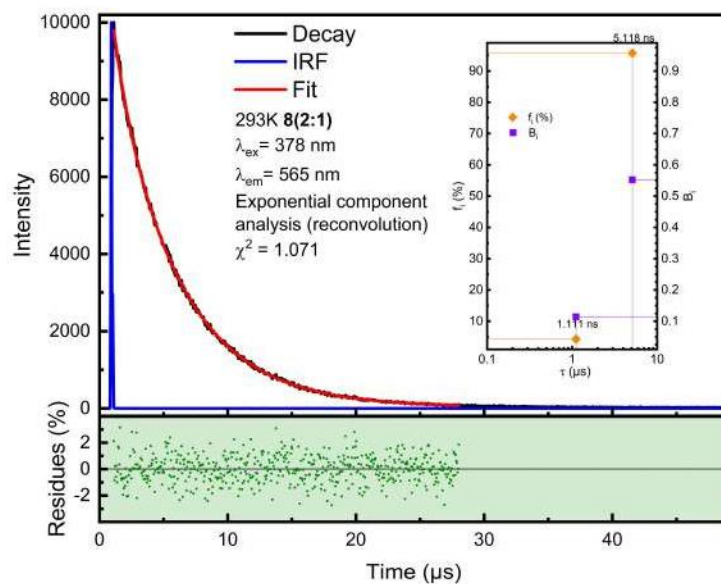

**Figure S119.** PL decay of **8(2:1)** at 293K.

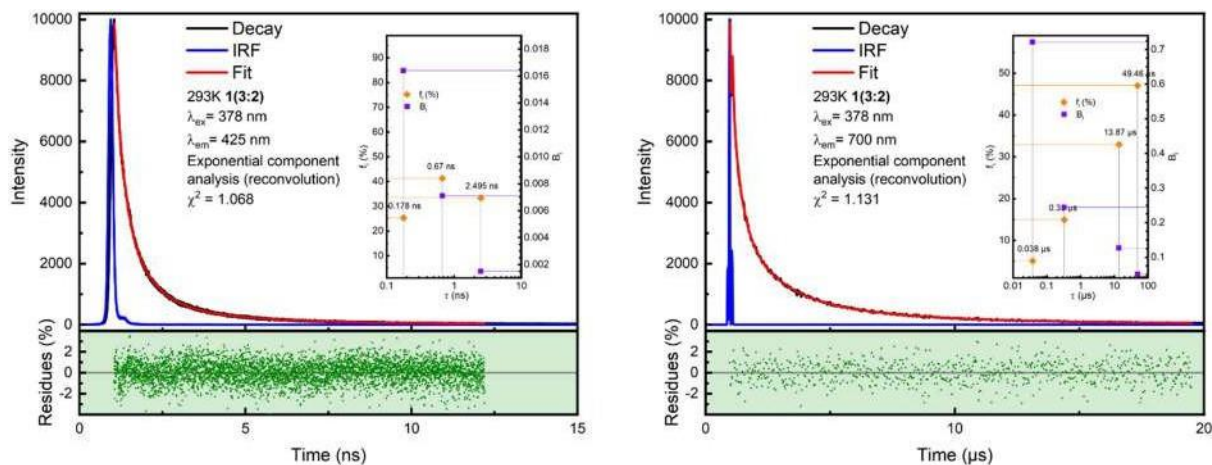

**Figure S120.** PL decay of **1(3:2)** at 293K. Left : short lifetimes. Right : long lifetimes.

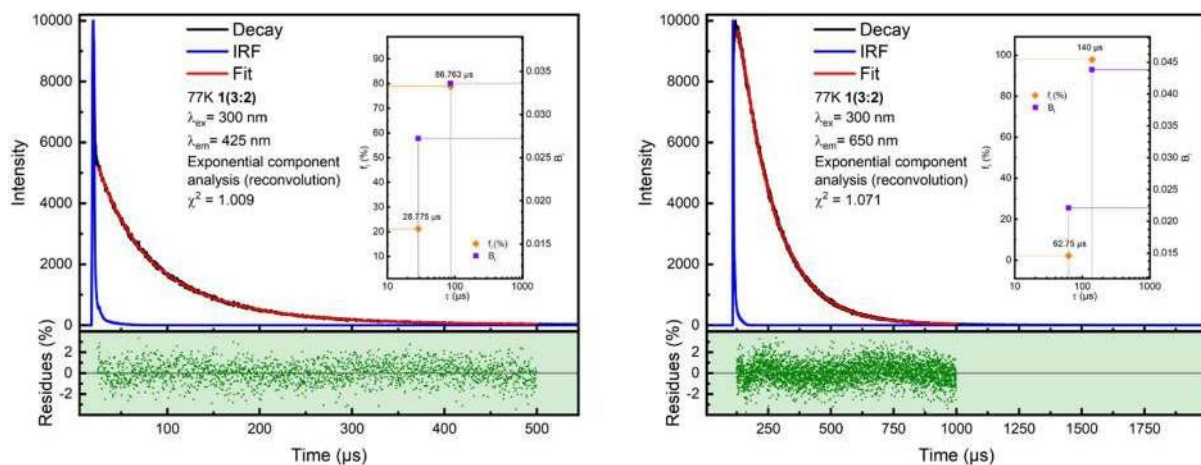

**Figure S121.** PL decay of **1(3:2)** at 77K. Left : short lifetimes. Right : long lifetimes.

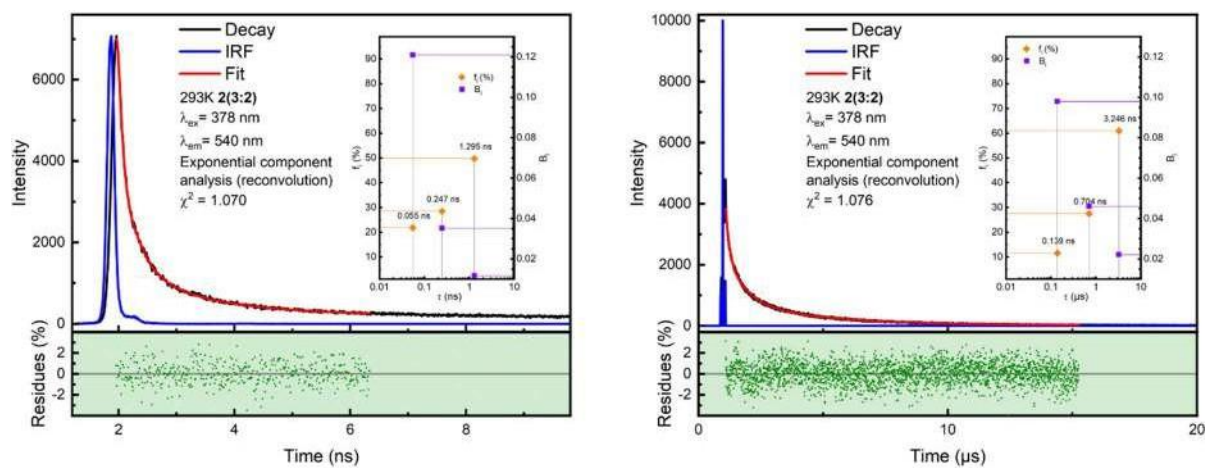

**Figure S122.** PL decay of **2(3:2)** at 293K. Left : short lifetimes. Right : long lifetimes.

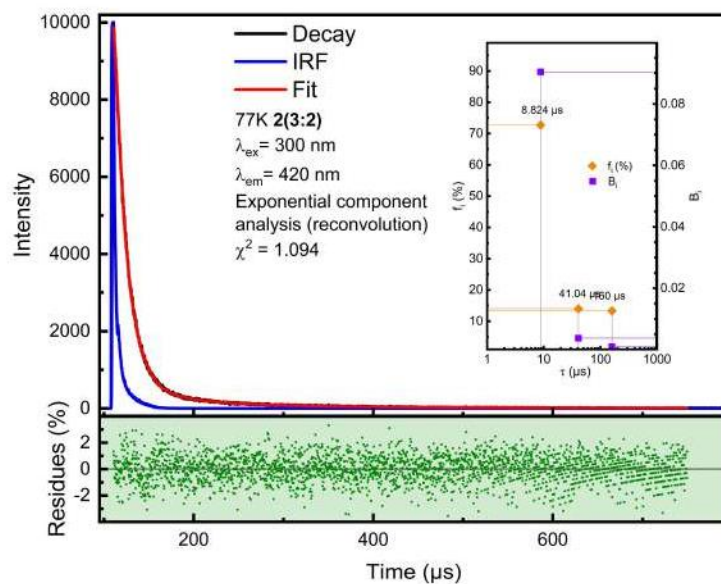

**Figure S123.** PL decay of 2(3:2) at 77K.

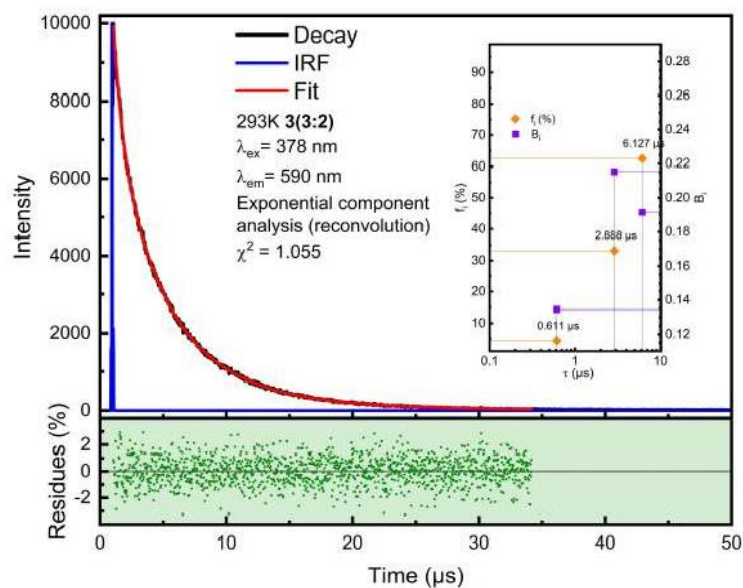

**Figure S124.** PL decay of 3(3:2) at 293K.



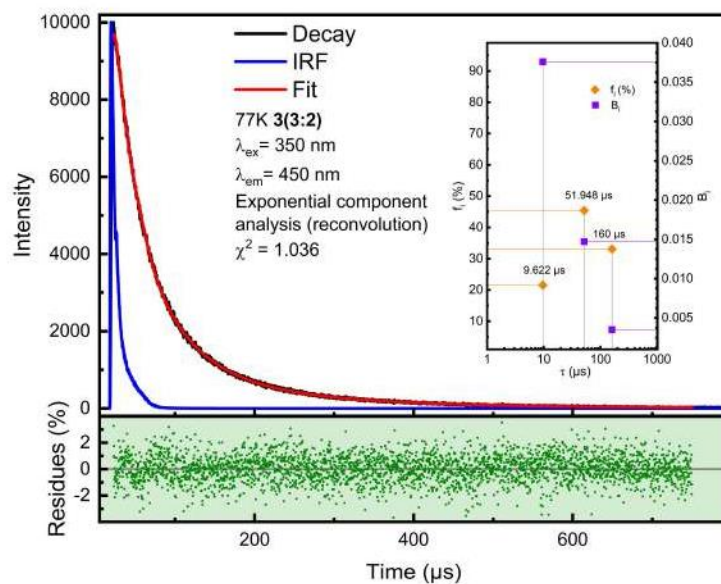

**Figure S125.** PL decay of 3(3:2) at 77K.

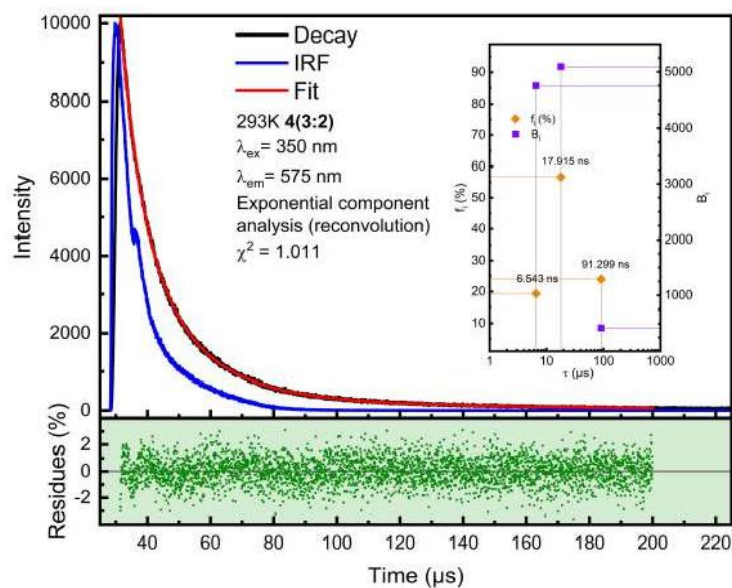

**Figure S126.** PL decay of 4(3:2) at 293K.

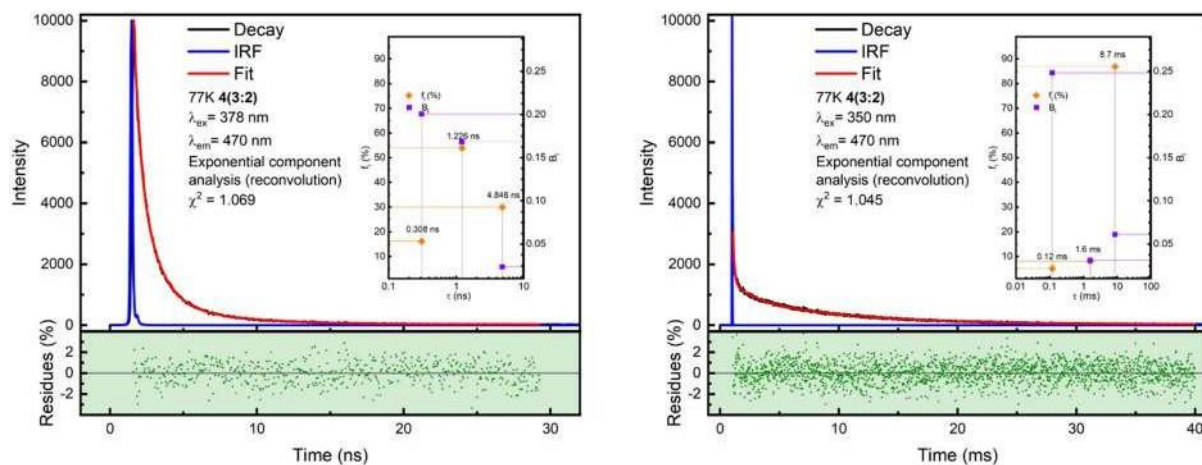

**Figure S127.** PL decay of 4(3:2) at 77K. Left : short lifetimes. Right : long lifetimes.

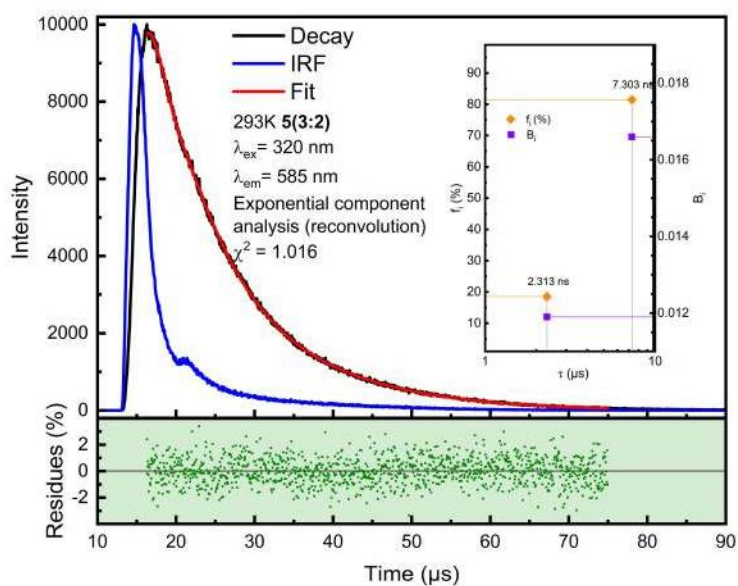

**Figure S128.** PL decay of 5(3:2) at 293K.

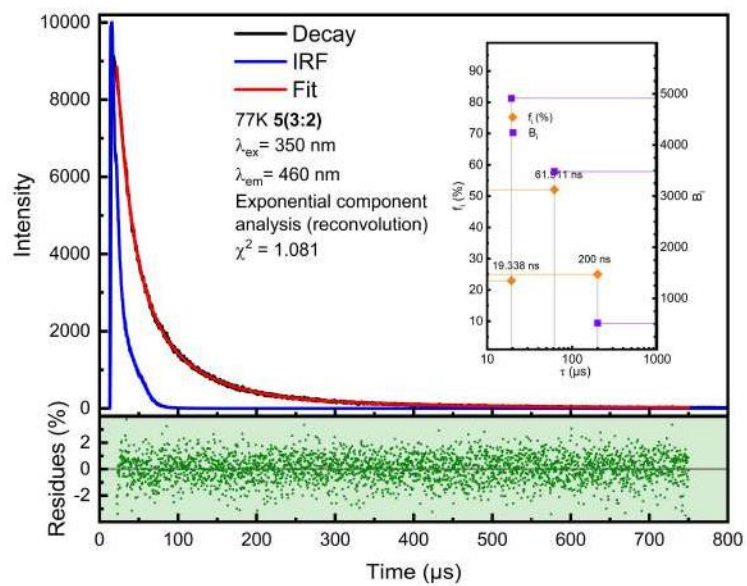

**Figure S129.** PL decay of **5(3:2)** at 77K.

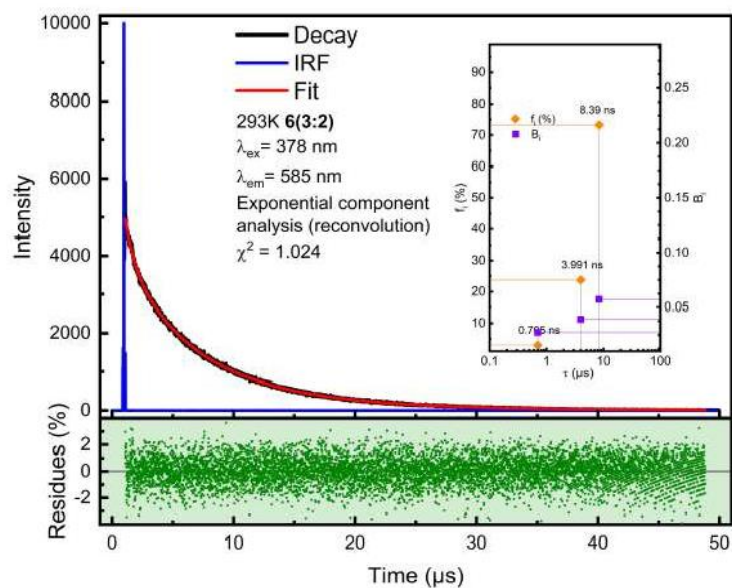

**Figure S130.** PL decay of **6(3:2)** at 293K.

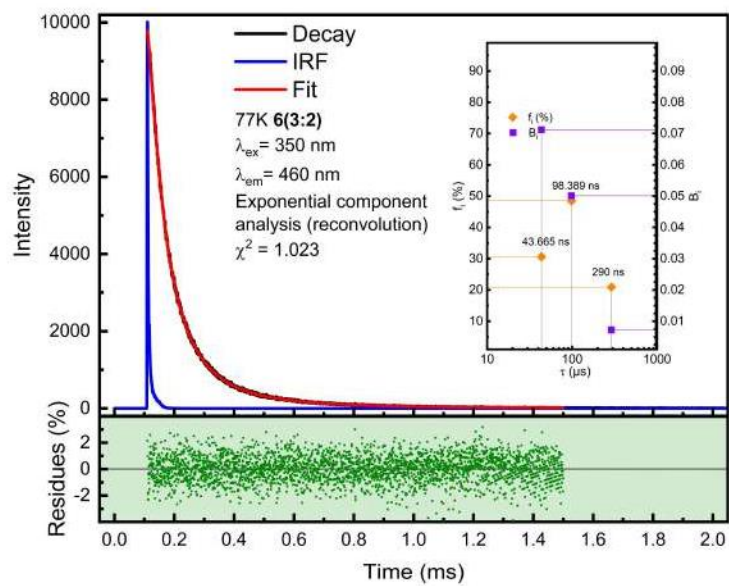

**Figure S131.** PL decay of **6(3:2)** at 77K.

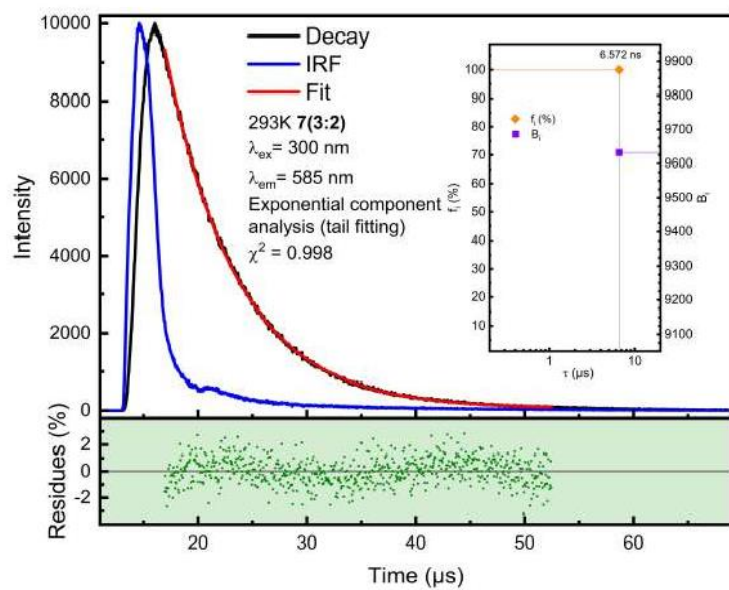

**Figure S132.** PL decay of **7(3:2)** at 293K.

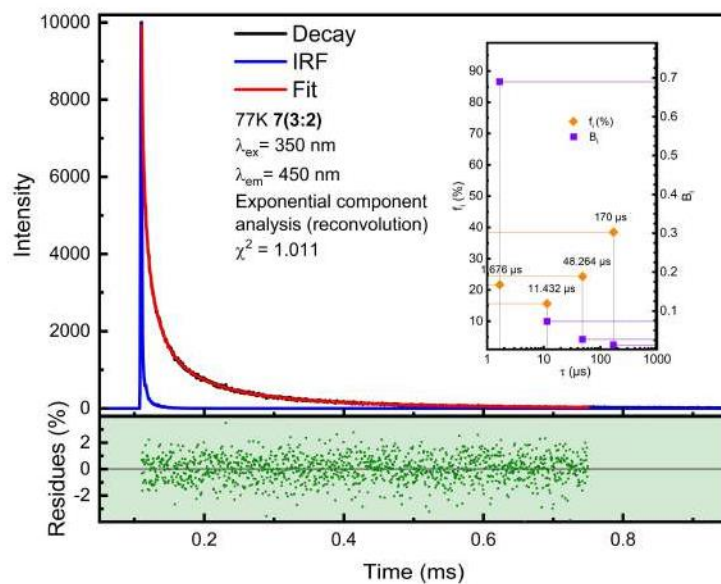

**Figure S133.** PL decay of 7(3:2) at 77K.

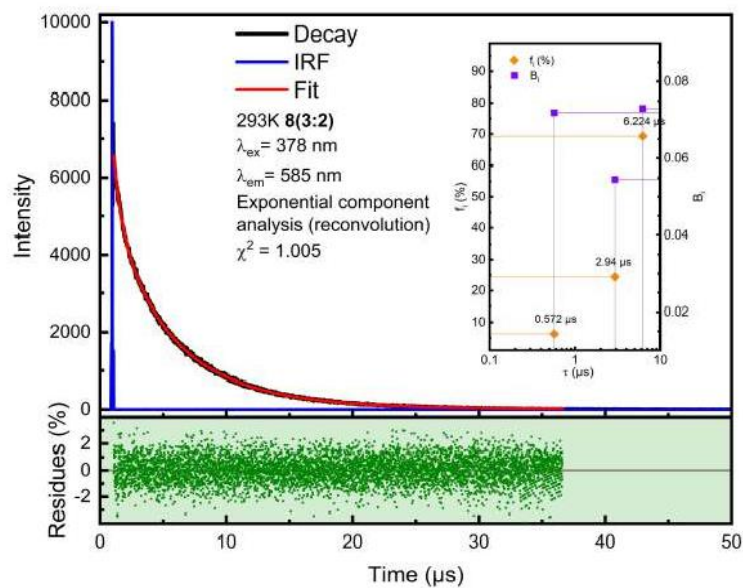

**Figure S134.** PL decay of 8(3:2) at 293K.



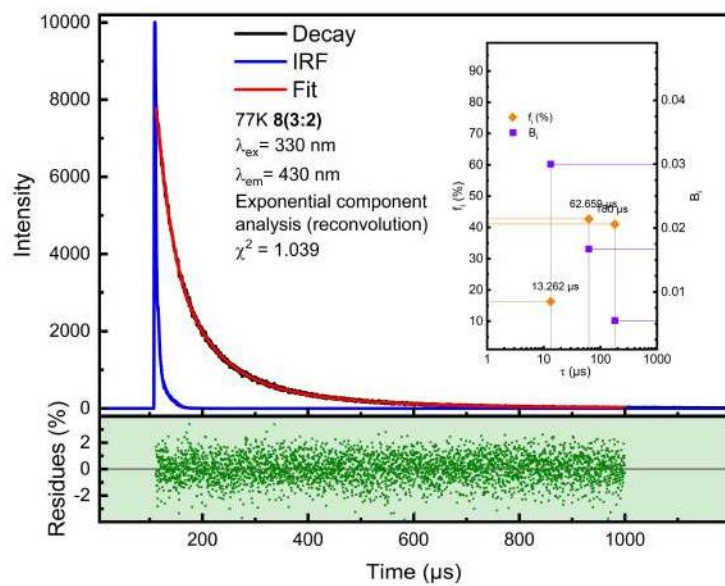

**Figure S135.** PL decay of 8(3:2) at 77K.

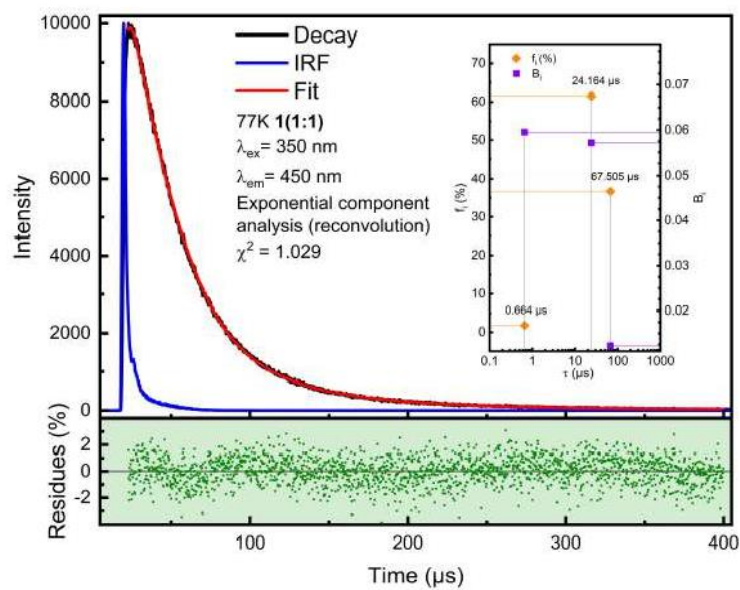

**Figure S136.** PL decay of 1(1:1) at 77K.

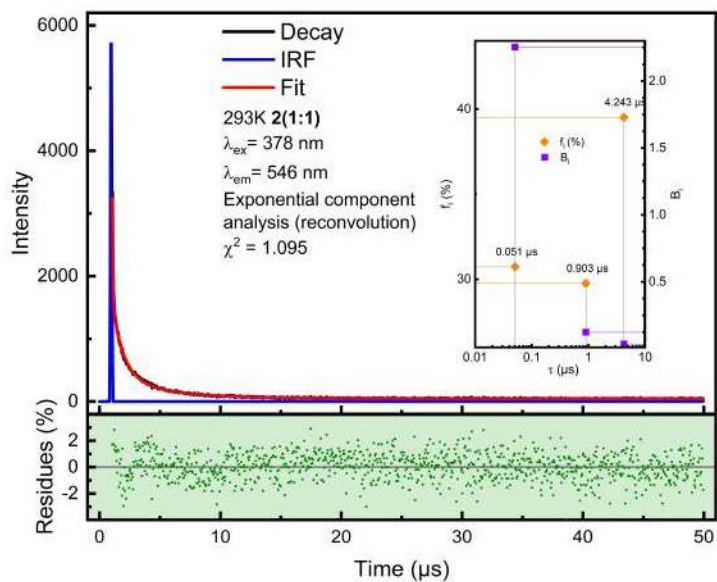

**Figure S137.** PL decay of **2(1:1)** at 293K.

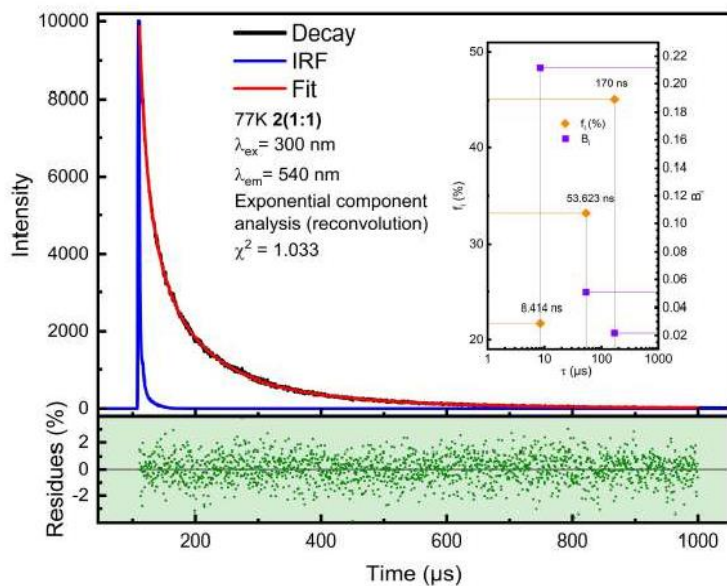

**Figure S138.** PL decay of **2(1:1)** at 77K.

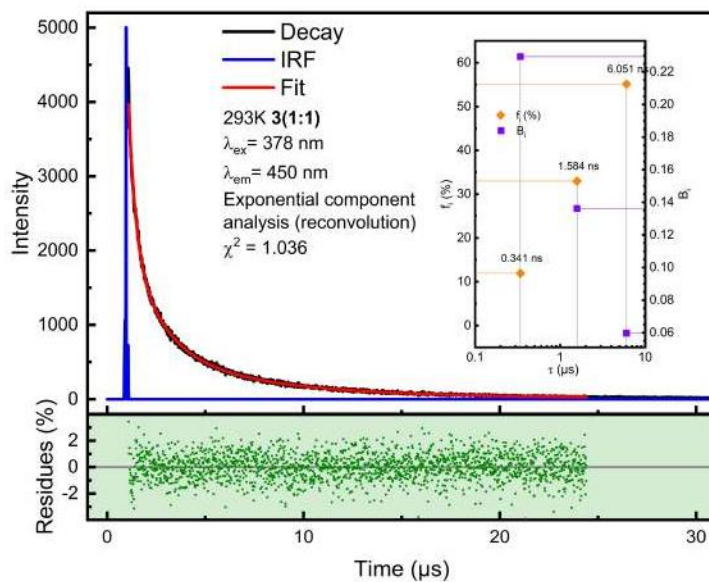

**Figure S139.** PL decay of **3(1:1)** at 293K.

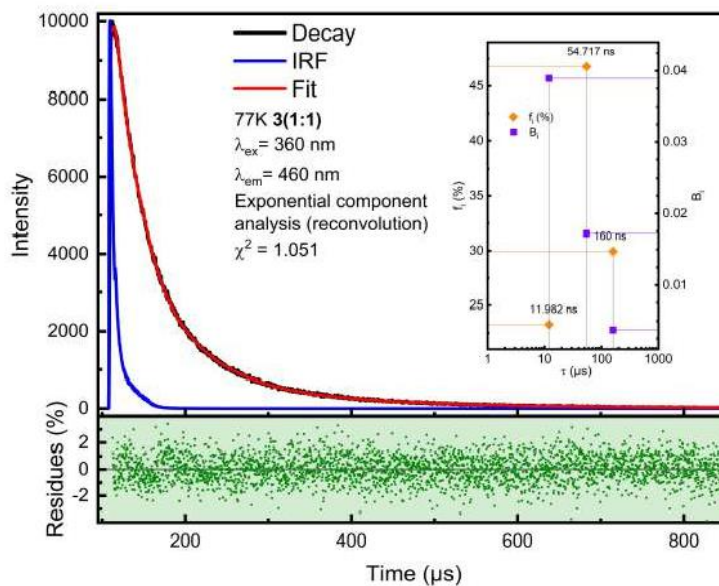

**Figure S140.** PL decay of **3(1:1)** at 77K.



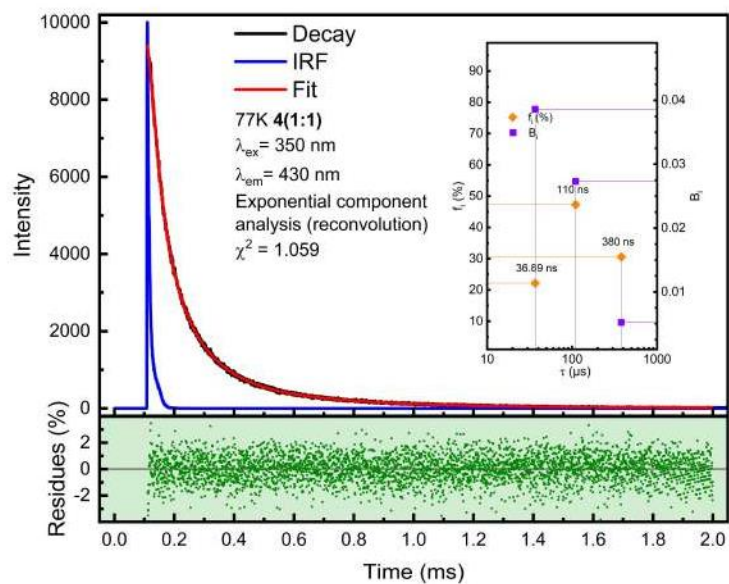

**Figure S141.** PL decay of **4(1:1)** at 77K.

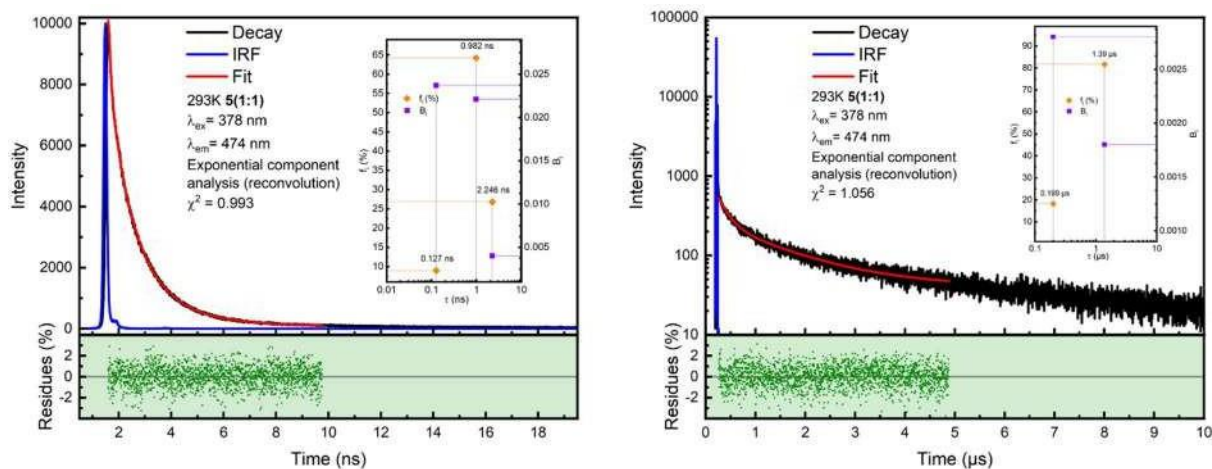

**Figure S142.** PL decay of **5(1:1)** at 293K. Left : short lifetimes. Right : long lifetimes.

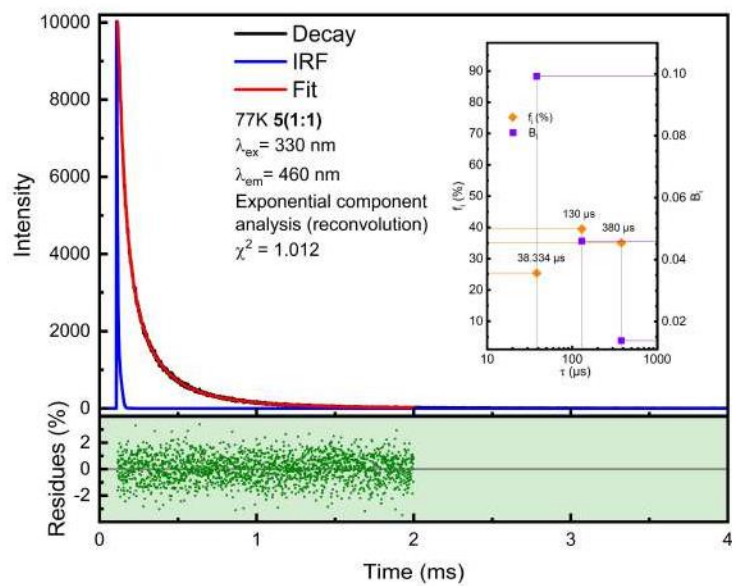

**Figure S143.** PL decay of **5(1:1)** at 77K.

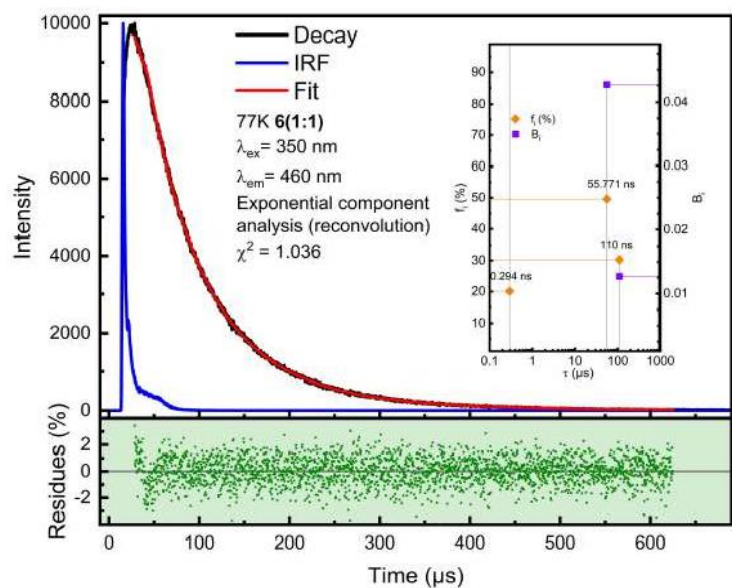

**Figure S144.** PL decay of **6(1:1)** at 77K.

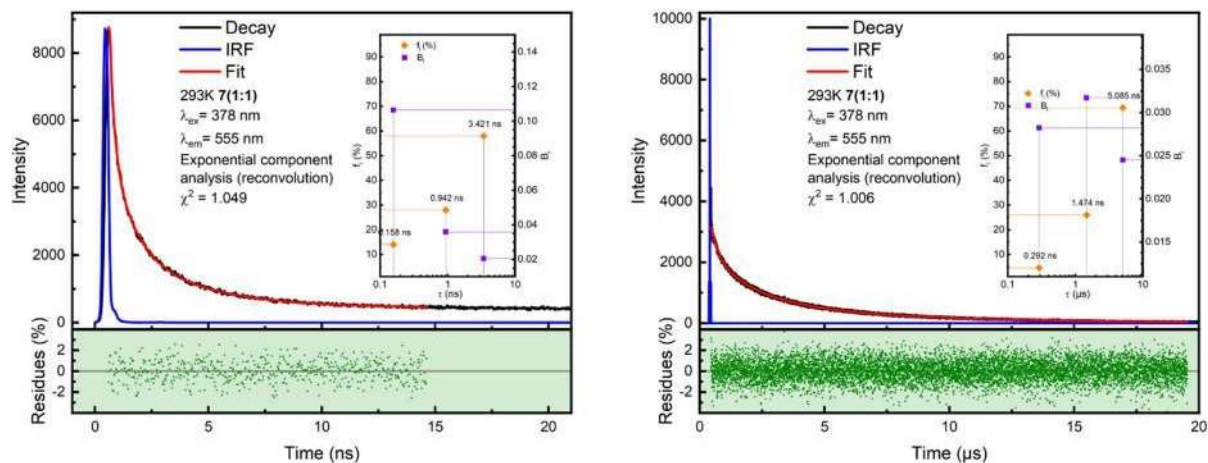

**Figure S145.** PL decay of 7(1:1) at 293K. Left : short lifetimes. Right : long lifetimes.

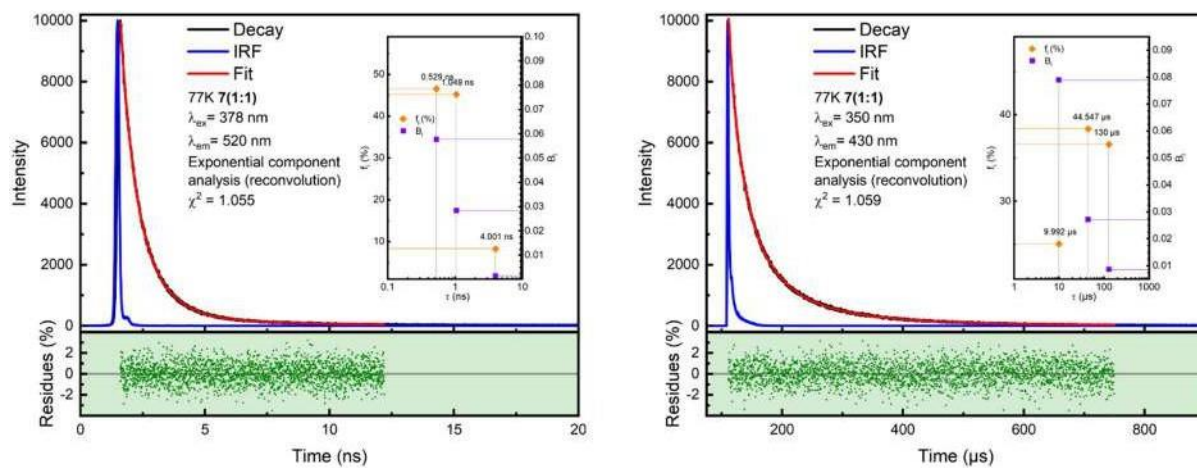

**Figure S146.** PL decay of 7(1:1) at 77K. Left : short lifetimes. Right : long lifetimes.

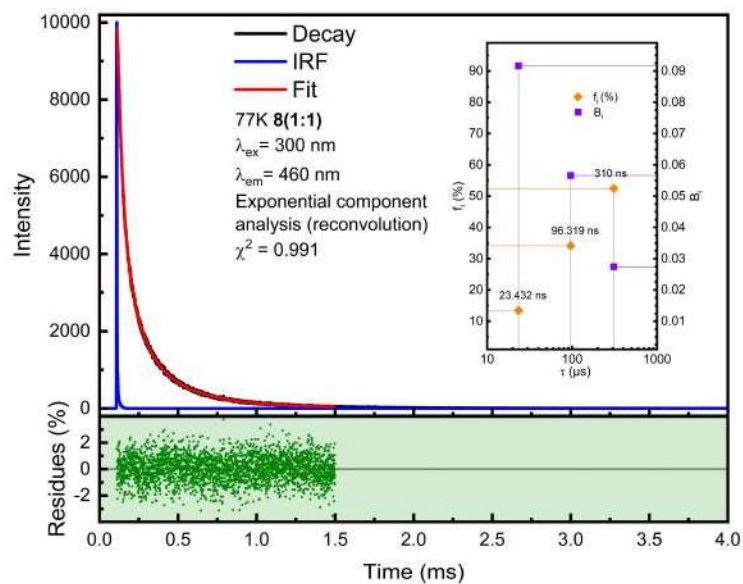

**Figure S147.** PL decay of **8(1:1)** at 77K.

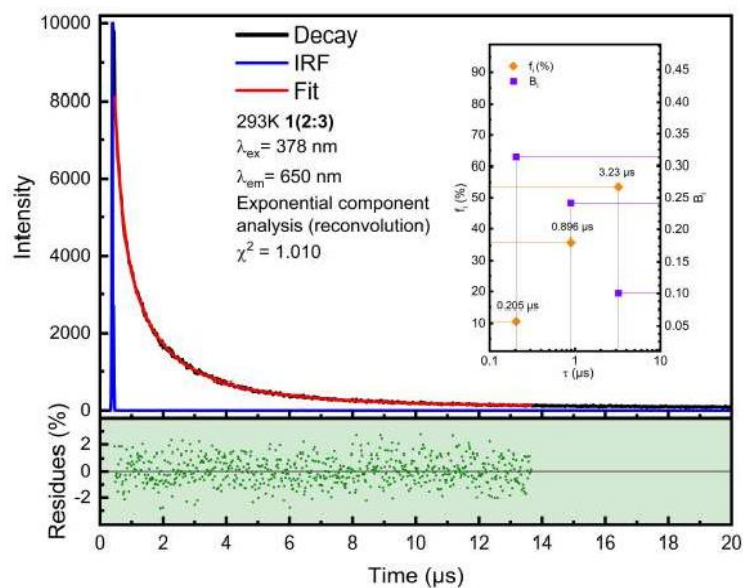

**Figure S148.** PL decay of **1(2:3)** at 293K.

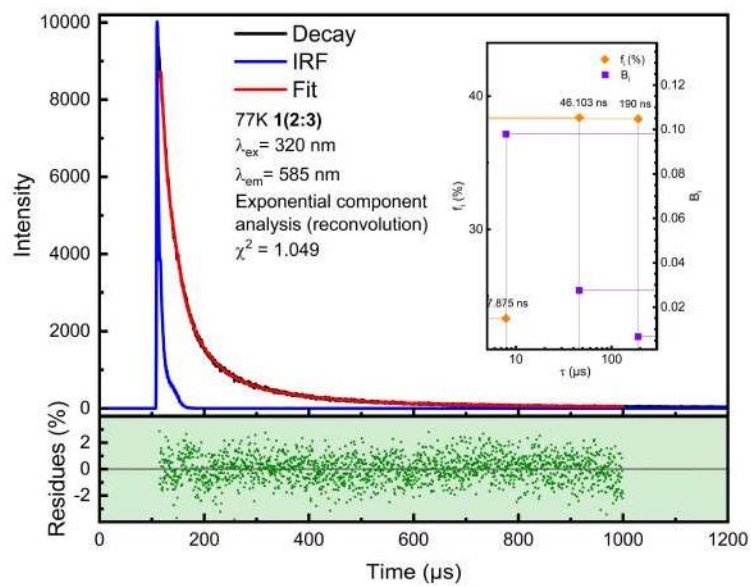

**Figure S149.** PL decay of **1(2:3)** at 77K.

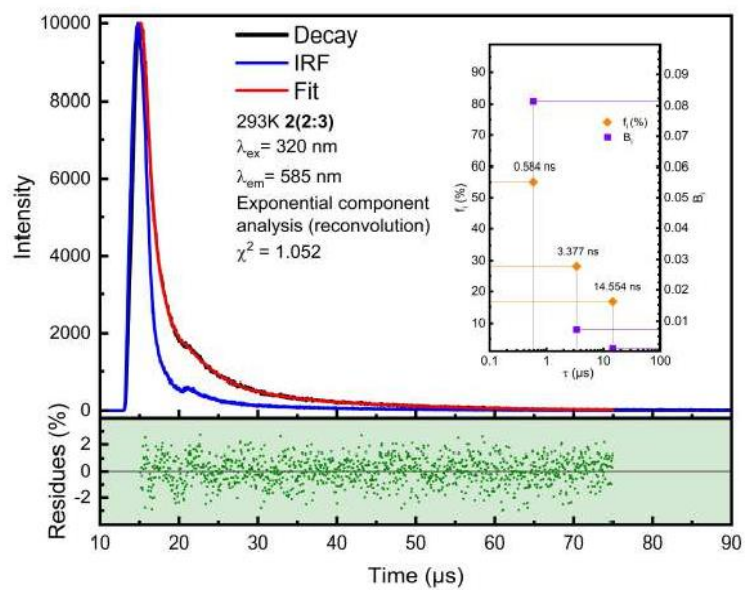

**Figure S150.** PL decay of **2(2:3)** at 293K.



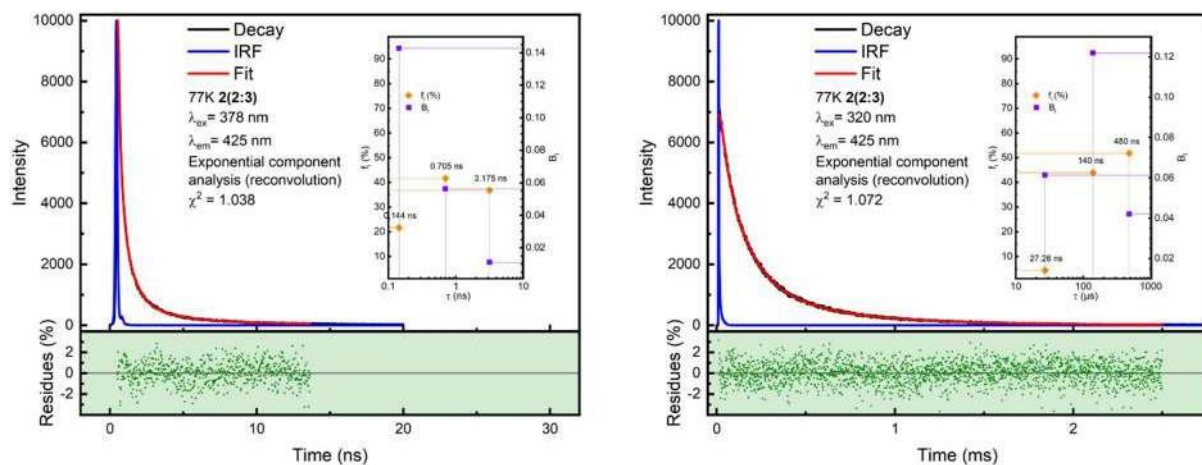

**Figure S151.** PL decay of **2(2:3)** at 77K. Left : short lifetimes. Right : long lifetimes.

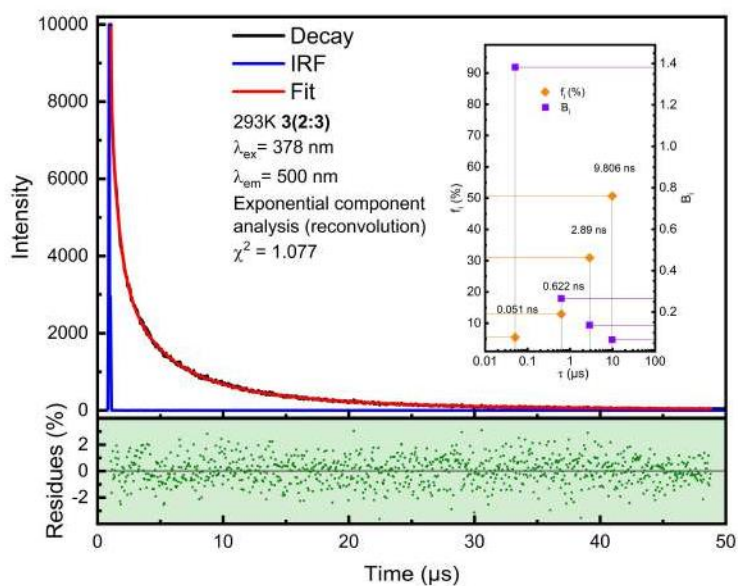

**Figure S152.** PL decay of **3(2:3)** at 293K.

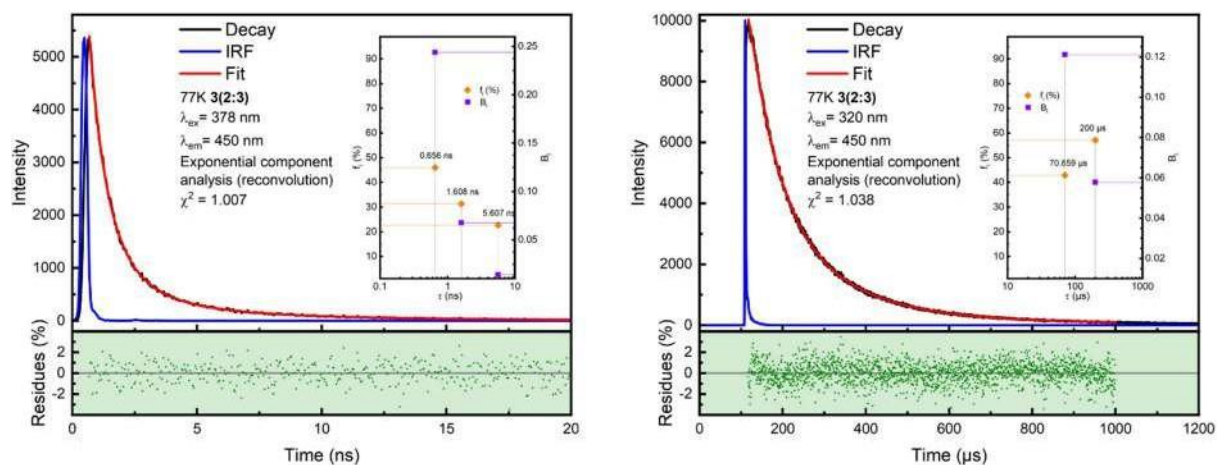

**Figure S153.** PL decay of **3(2:3)** at 77K.

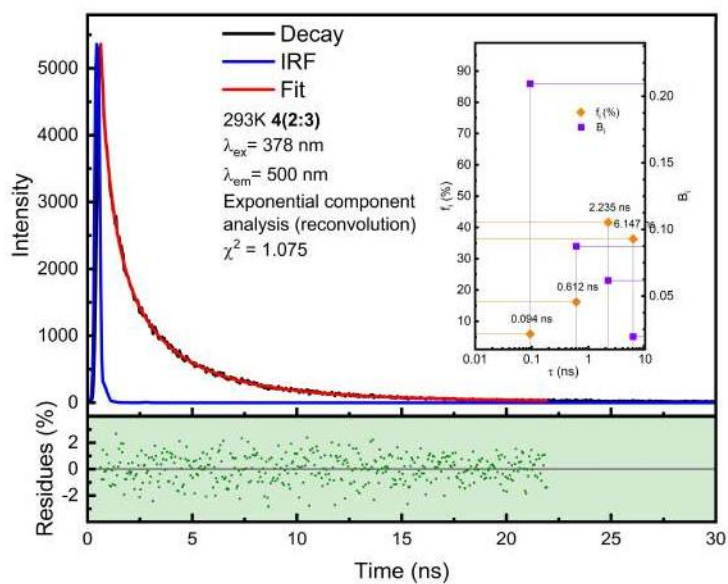

**Figure S154.** PL decay of **4(2:3)** at 293K.

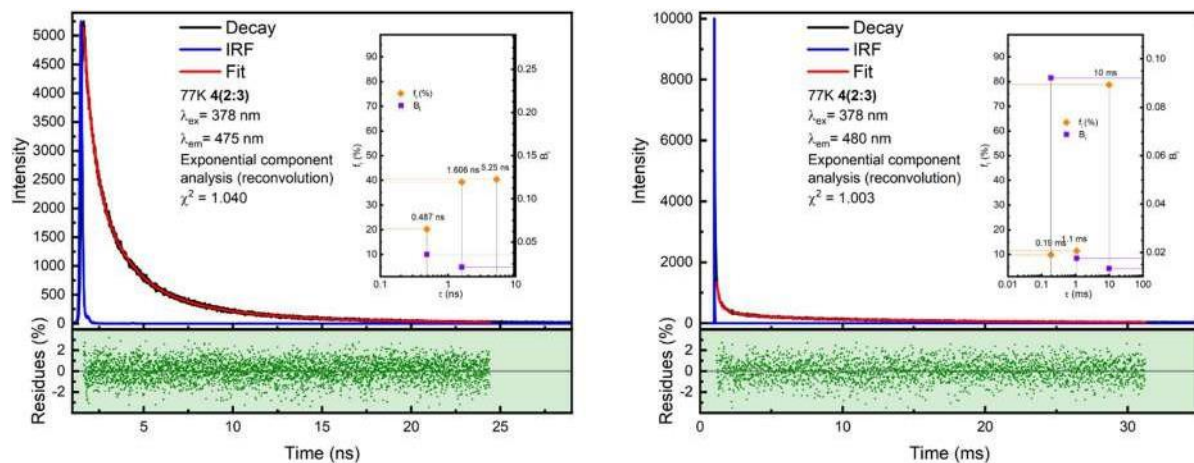

**Figure S155.** PL decay of **4(2:3)** at 77K. Left : short lifetimes. Right : long lifetimes.

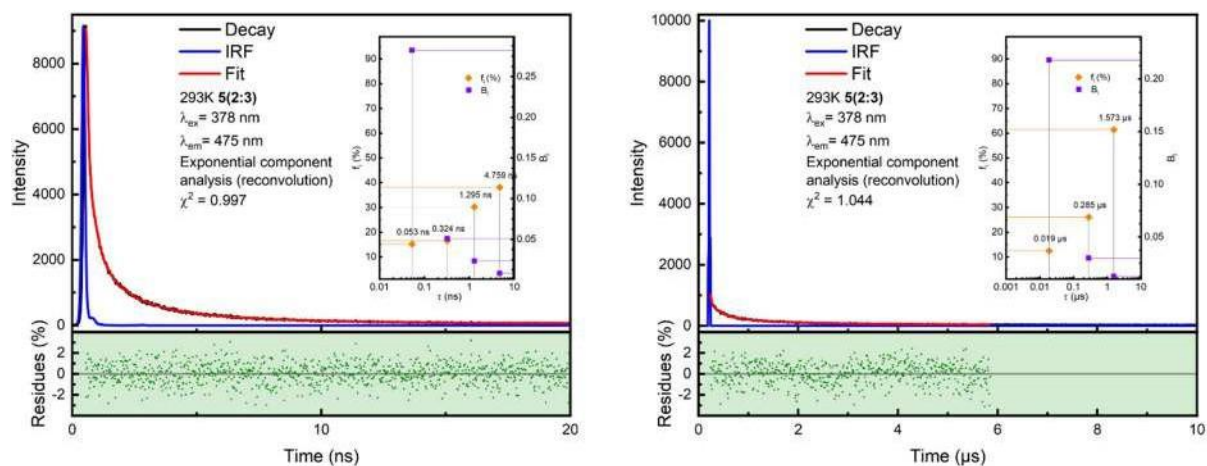

**Figure S156.** PL decay of **5(2:3)** at 293K. Left : short lifetimes. Right : long lifetimes.



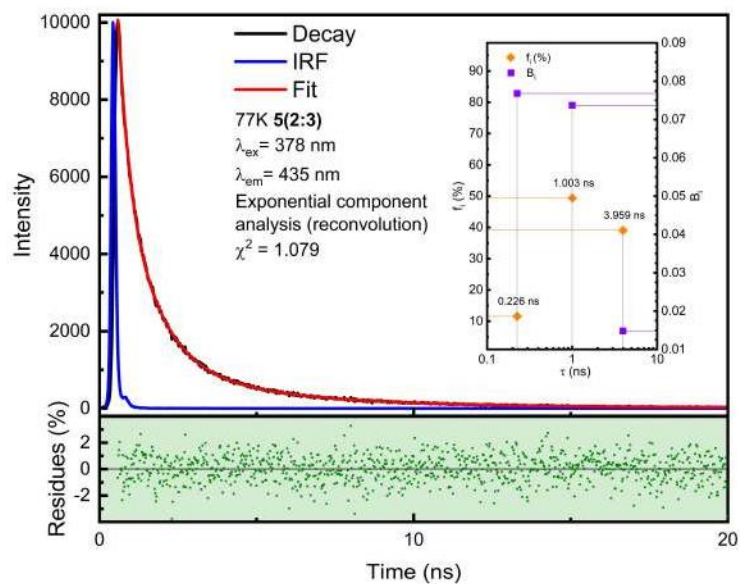

**Figure S157.** PL decay of **5(2:3)** at 77K.

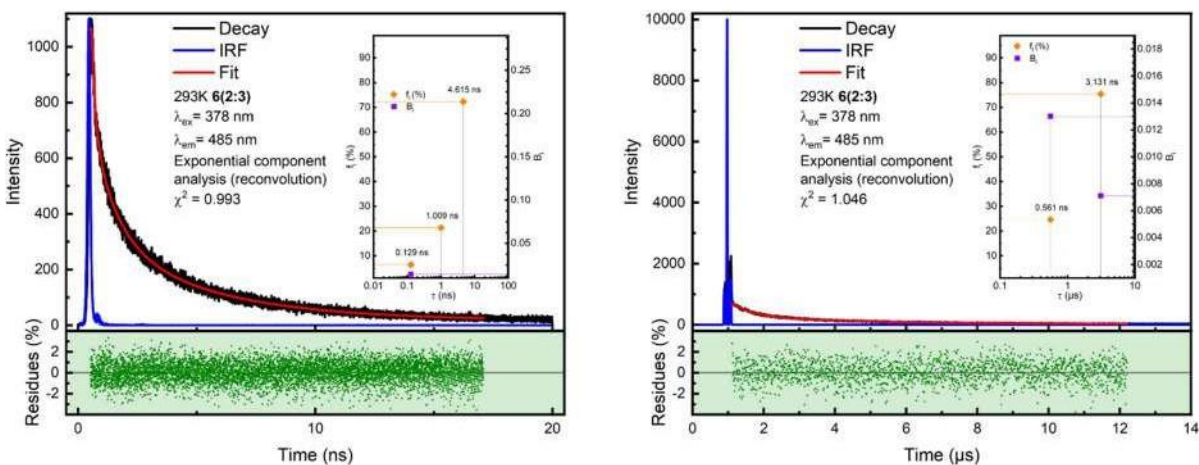

**Figure S158.** PL decay of **6(2:3)** at 293K. Left : short lifetimes. Right : long lifetimes.

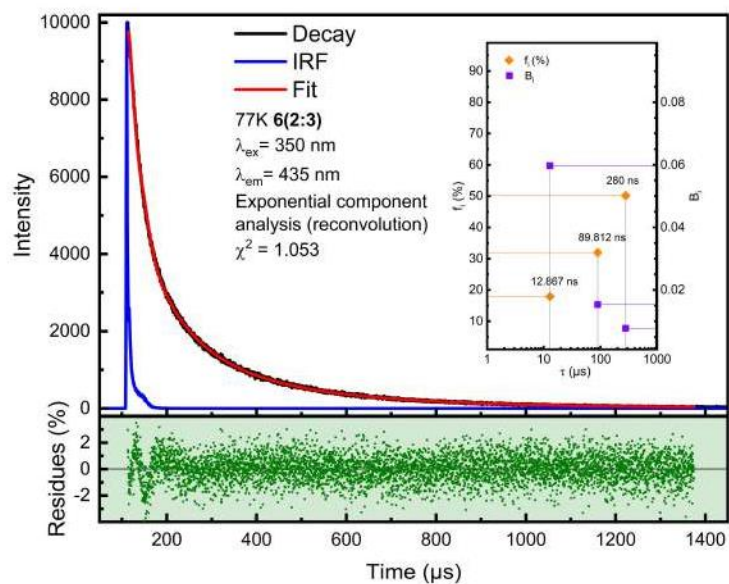

**Figure S159.** PL decay of **6(2:3)** at 77K.

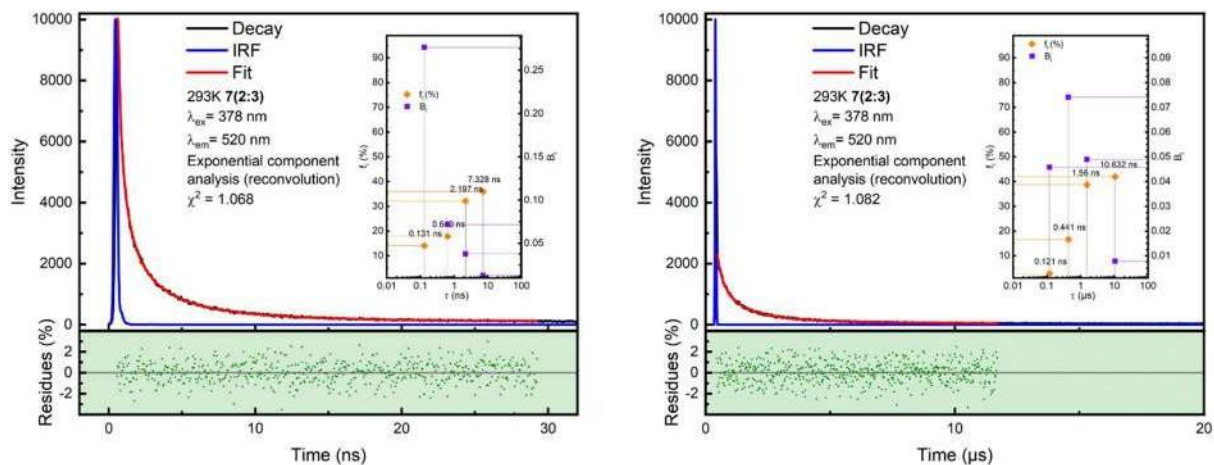

**Figure S160.** PL decay of **7(2:3)** at 77K. Left : short lifetimes. Right : long lifetimes.

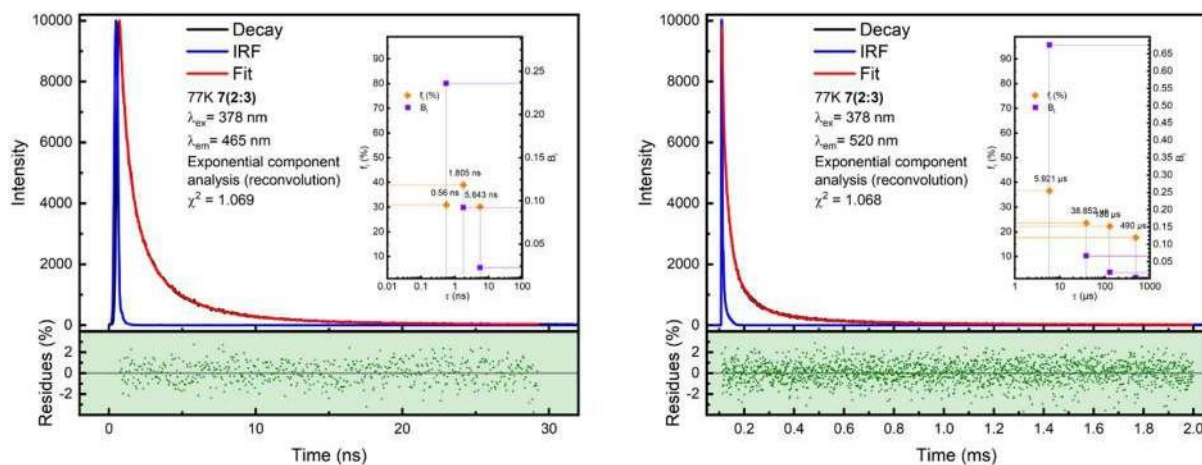

**Figure S161.** PL decay of **7(2:3)** at 77K. Left : short lifetimes. Right : long lifetimes.

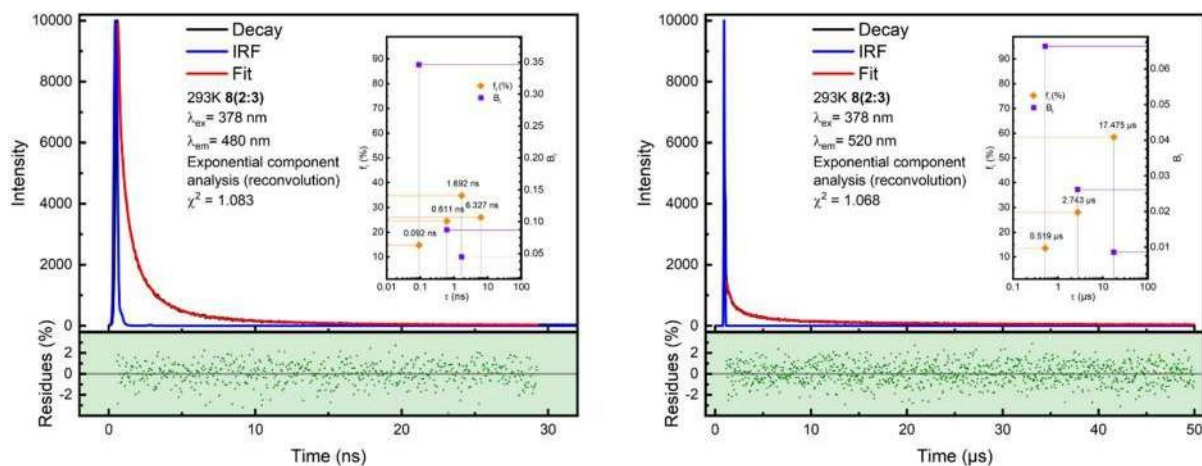

**Figure S162.** PL decay of **8(2:3)** at 293K. Left : short lifetimes. Right : long lifetimes.

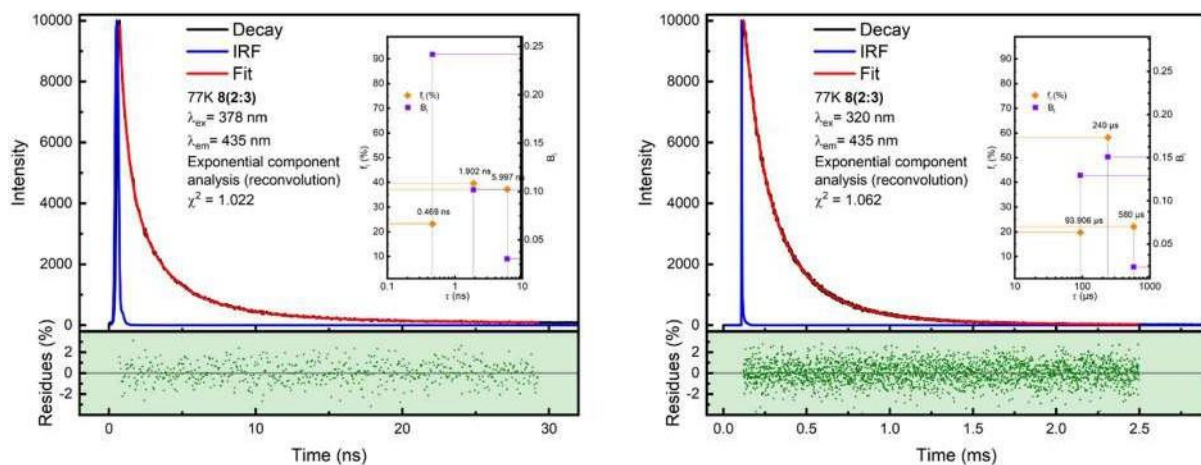

**Figure S163.** PL decay of **8(2:3)** at 77K. Left : short lifetimes. Right : long lifetimes.

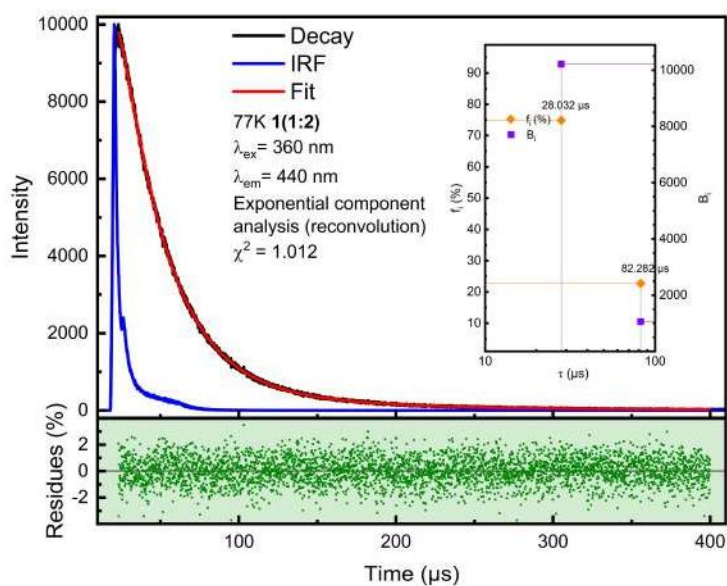

**Figure S164.** PL decay of **1(1:2)** at 77K.

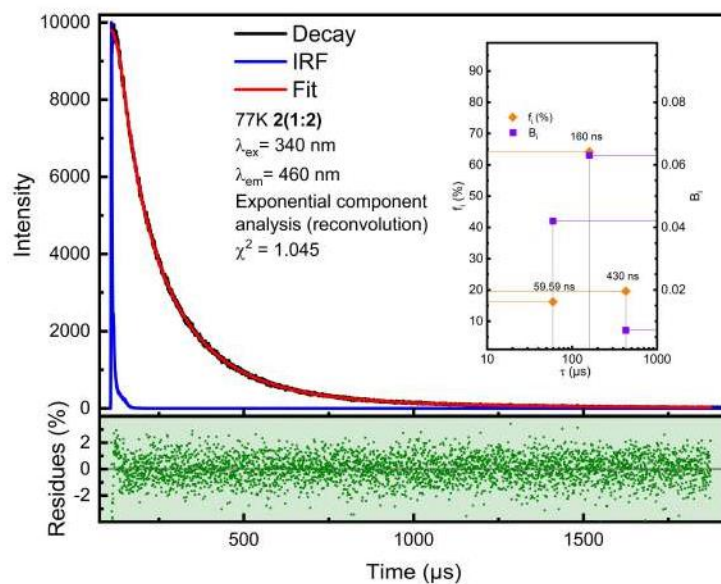

**Figure S165.** PL decay of **2(1:2)** at 77K.

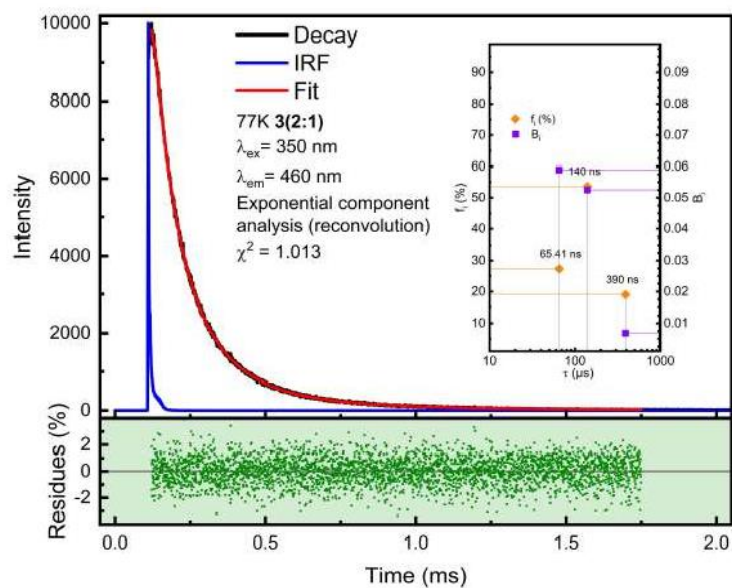

**Figure S166.** PL decay of **3(2:1)** at 77K.



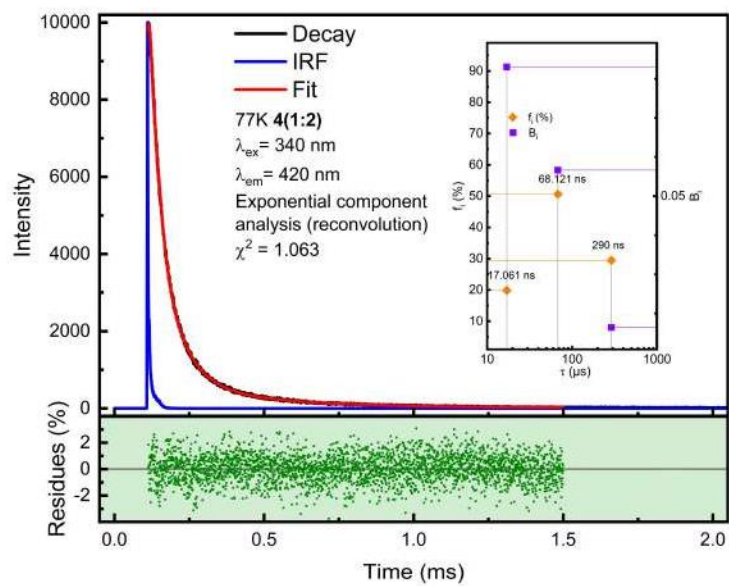

**Figure S167.** PL decay of **4(1:2)** at 77K.

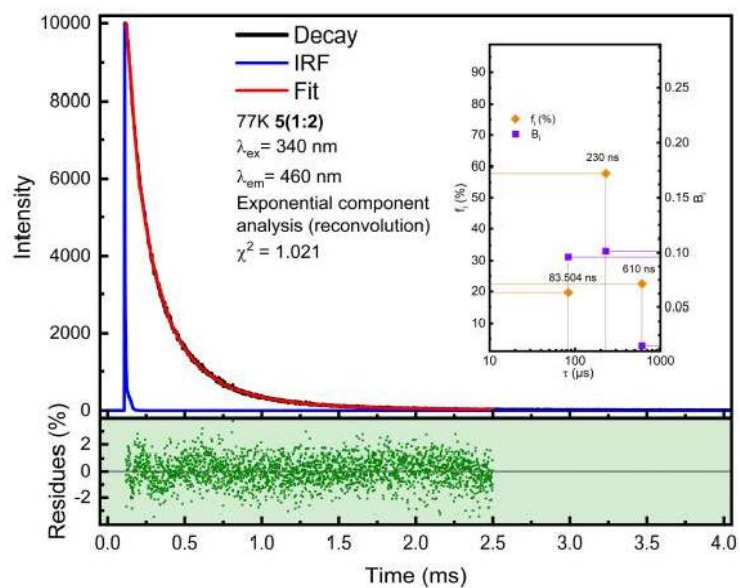

**Figure S168.** PL decay of **5(1:2)** at 77K.

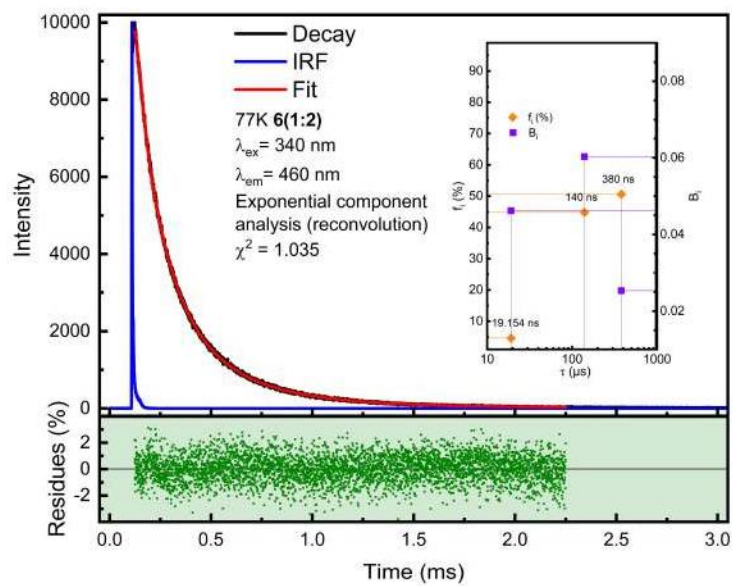

**Figure S169.** PL decay of **6(1:2)** at 77K.

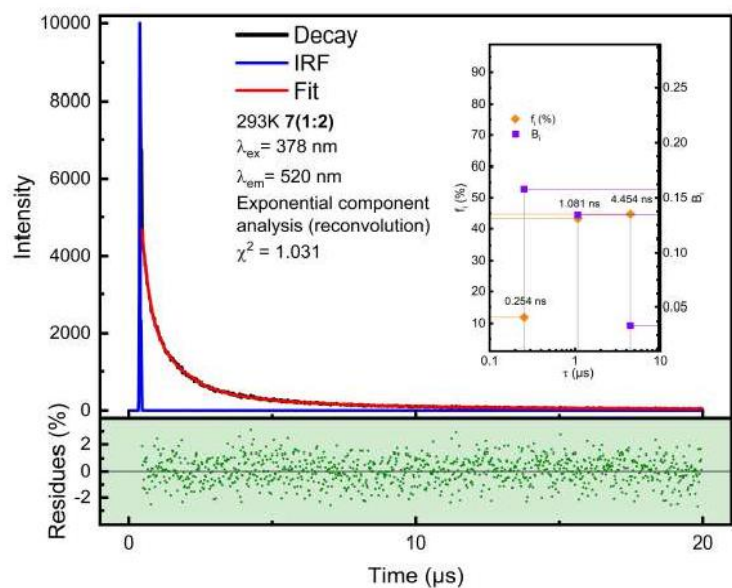

**Figure S170.** PL decay of **7(1:2)** at 293K.

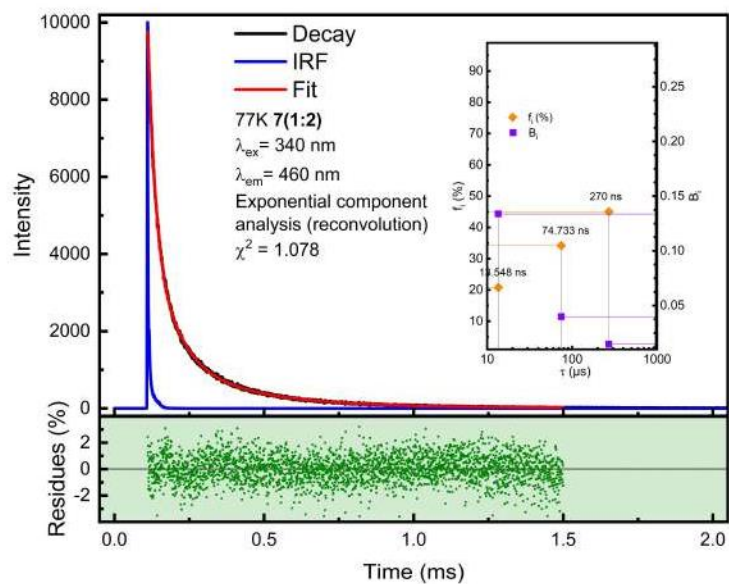

**Figure S171.** PL decay of **7(1:2)** at 77K.

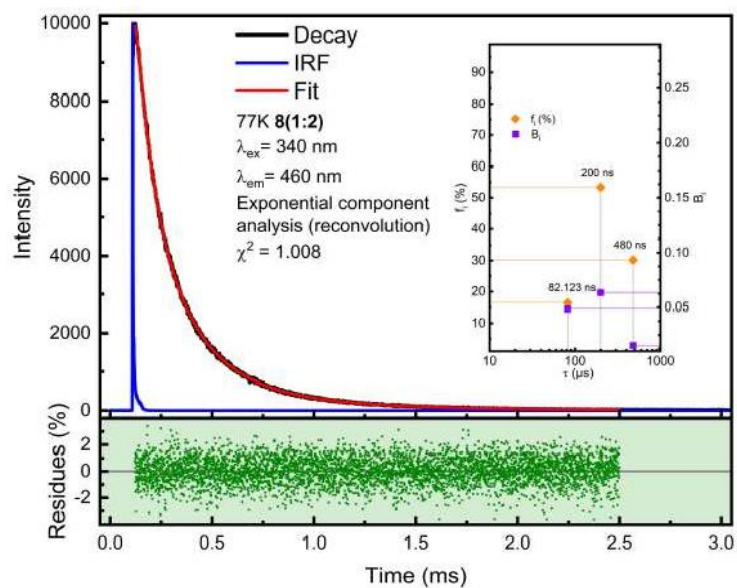

**Figure S172.** PL decay of **8(1:2)** at 77K.



**Table S1.** PL decay lifetime components for all compounds.<sup>a</sup>

| <b>Sample</b> | <b><math>\tau_1</math>(%)</b> | <b><math>\tau_2</math>(%)</b> | <b><math>\tau_3</math>(%)</b> | <b><math>\tau_4</math>(%)</b> | <b><math>\chi^2</math></b> | <b>Notes</b>          |
|---------------|-------------------------------|-------------------------------|-------------------------------|-------------------------------|----------------------------|-----------------------|
|               | 1.03 $\mu$ s<br>(1.64)        | 6.86 $\mu$ s<br>(98.4)        | n.a.                          | n.a.                          | 1.032                      | 293K                  |
| <b>1(2:1)</b> | 366ns<br>(28.3)               | 1.65 $\mu$ s<br>(48.0)        | 6.38 $\mu$ s<br>(23.7)        | n.a.                          | 1.156                      | 77K, short lifetimes  |
|               | 37.0 $\mu$ s<br>(100)         | n.a.                          | n.a.                          | n.a.                          | 1.053                      | 77K, long lifetimes   |
| <b>2(2:1)</b> | 255ns<br>(17.7)               | 1.77 $\mu$ s<br>(32.1)        | 6.14 $\mu$ s<br>(50.2)        | n.a.                          | 1.367                      | 293K                  |
|               | 15.5 $\mu$ s<br>(26.7)        | 69.1 $\mu$ s<br>(34.4)        | 270 $\mu$ s<br>(38.9)         | n.a.                          | 1.000                      | 77K                   |
| <b>3(2:1)</b> | 497ns<br>(6.43)               | 2.71 $\mu$ s<br>(34.2)        | 6.37 $\mu$ s<br>(59.4)        | n.a.                          | 1.100                      | 293K                  |
|               | 599ns<br>(10.3)               | 15.5 $\mu$ s<br>(14.5)        | 63.3 $\mu$ s<br>(41.9)        | 190 $\mu$ s<br>(33.4)         | 1.074                      | 77K                   |
|               | 1.73 $\mu$ s<br>(49.9)        | 5.87 $\mu$ s<br>(31.3)        | 42.5 $\mu$ s<br>(18.8)        | n.a.                          | 1.011                      | 293K                  |
| <b>4(2:1)</b> | 7.85 $\mu$ s<br>(34.2)        | 54.2 $\mu$ s<br>(33.4)        | 250 $\mu$ s<br>(32.4)         | n.a.                          | 1.024                      | 77K, short lifetimes  |
|               | 26.5 $\mu$ s<br>(24.5)        | 1.6ms<br>(13.2)               | 9.4ms<br>(85.6)               | n.a.                          | 1.043                      | 77K, long lifetimes   |
| <b>5(2:1)</b> | 5.13 $\mu$ s<br>(35.9)        | 9.18 $\mu$ s<br>(64.1)        | n.a.                          | n.a.                          | 1.000                      | 293K                  |
|               | 20.8 $\mu$ s<br>(63.1)        | 75.0 $\mu$ s<br>(23.0)        | 250 $\mu$ s<br>(13.8)         | n.a.                          | 1.003                      | 77K                   |
| <b>6(2:1)</b> | 665ns<br>(5.05)               | 3.79 $\mu$ s<br>(51.2)        | 7.43 $\mu$ s<br>(43.8)        | n.a.                          | 1.062                      | 293K                  |
| <b>7(2:1)</b> | 1.30 $\mu$ s<br>(3.79)        | 5.00 $\mu$ s<br>(96.2)        | n.a.                          | n.a.                          | 1.088                      | 293K                  |
| <b>8(2:1)</b> | 1.11 $\mu$ s<br>(4.28)        | 5.12 $\mu$ s<br>(95.7)        | n.a.                          | n.a.                          | 1.071                      | 293K                  |
|               | 178ps<br>(25.3)               | 670ps<br>(41.3)               | 2.50ns<br>(33.4)              | n.a.                          | 1.068                      | 293K, short lifetimes |
| <b>1(3:2)</b> | 38.0ns<br>(5.08)              | 330ns<br>(14.9)               | 13.9 $\mu$ s<br>(32.9)        | 49.5 $\mu$ s<br>(47.0)        | 1.131                      | 293K, long lifetimes  |

|                        |                        |      |      |       |                         |
|------------------------|------------------------|------|------|-------|-------------------------|
| 28.8 $\mu$ s<br>(21.2) | 86.8 $\mu$ s<br>(78.8) | n.a. | n.a. | 1.009 | 77K, short<br>lifetimes |
| <hr/>                  |                        |      |      |       |                         |
| <hr/>                  |                        |      |      |       |                         |
| <hr/>                  |                        |      |      |       |                         |

|               |                        |                         |                        |                       |       |                          |
|---------------|------------------------|-------------------------|------------------------|-----------------------|-------|--------------------------|
|               | 62.8 $\mu$ s<br>(2.18) | 140 $\mu$ s<br>(97.8)   | n.a.                   | n.a.                  | 1.071 | 77K, long<br>lifetimes   |
|               | <100ps<br>(21.8)       | 247ps<br>(28.5)         | 1.30ns<br>(49.7)       | n.a.                  | 1.070 | 293K, short<br>lifetimes |
| <b>2(3:2)</b> | 139ns<br>(11.5)        | 704ns<br>(27.5)         | 3.25 $\mu$ s<br>(61.0) | n.a.                  | 1.076 | 293K, long<br>lifetimes  |
|               | 8.82 $\mu$ s<br>(72.7) | 41.0 $\mu$ s<br>(14.0)  | 160 $\mu$ s<br>(13.3)  | n.a.                  | 1.094 | 77K                      |
|               | 611ns<br>(4.38)        | 2.89 $\mu$ s<br>(33.1)  | 6.13 $\mu$ s<br>(62.5) | n.a.                  | 1.055 | 293K                     |
| <b>3(3:2)</b> | 9.62 $\mu$ s<br>(21.5) | 51.9 $\mu$ s<br>(45.4)  | 160 $\mu$ s<br>(33.1)  | n.a.                  | 1.036 | 77K                      |
|               | 6.54 $\mu$ s<br>(19.3) | 17.9 $\mu$ s<br>(56.7)  | 91.3 $\mu$ s<br>(24.0) | n.a.                  | 1.011 | 293K                     |
| <b>4(3:2)</b> | 308ps<br>(16.1)        | 1.23ns<br>(53.9)        | 4.85ns<br>(30.0)       | n.a.                  | 1.069 | 77K, short<br>lifetimes  |
|               | 120 $\mu$ s<br>(5.08)  | 1.6ms<br>(8.03)         | 8.7ms<br>(86.9)        | n.a.                  | 1.045 | 77K, long<br>lifetimes   |
|               | 2.31 $\mu$ s<br>(18.5) | 7.30 $\mu$ s<br>(81.5)  | n.a.                   | n.a.                  | 1.016 | 293K                     |
| <b>5(3:2)</b> | 19.3 $\mu$ s<br>(23.0) | 61.9 $\mu$ s<br>(52.0)  | 200 $\mu$ s<br>(25.0)  | n.a.                  | 1.081 | 77K                      |
| <b>6(3:2)</b> | 705ns<br>(2.93)        | 3.99 $\mu$ s<br>(23.8)  | 8.39 $\mu$ s<br>(73.3) | n.a.                  | 1.024 | 293K                     |
|               | 6.57 $\mu$ s<br>(100)  | n.a.                    | n.a.                   | n.a.                  | 0.998 | 293K                     |
| <b>7(3:2)</b> | 1.68 $\mu$ s<br>(21.7) | 11.4 $\mu$ s<br>(15.6)  | 48.3 $\mu$ s<br>(24.3) | 170 $\mu$ s<br>(38.5) | 1.011 | 77K                      |
|               | 572ns<br>(6.26)        | 2.94 $\mu$ s<br>(24.4)  | 6.22 $\mu$ s<br>(69.3) | n.a.                  | 1.005 | 293K                     |
| <b>8(3:2)</b> | 13.3 $\mu$ s<br>(16.3) | 62.7 $\mu$ s<br>(42.7)  | 180 $\mu$ s<br>(41.0)  | n.a.                  | 1.039 | 77K                      |
|               | 504ns<br>(1.76)        | 24.2 $\mu$ s<br>(61.5)  | 67.5 $\mu$ s<br>(36.7) | n.a.                  | 1.029 | 77K                      |
| <b>1(1:1)</b> | 51.0ns<br>(30.7)       | 903ns<br>(29.8)         | 4.24 $\mu$ s<br>(39.5) | n.a.                  | 1.095 | 293K                     |
|               | 8.41 $\mu$ s<br>(21.7) | 53.6 $\mu$ s<br>(33.2)  | 170 $\mu$ s<br>(45.1)  | n.a.                  | 1.033 | 77K                      |
| <b>2(1:1)</b> | 541ns<br>(11.9)        | 1.58 $\mu$ s<br>(33.00) | 6.05 $\mu$ s<br>(55.1) | n.a.                  | 1.036 | 293K                     |

|               |                        |                        |                        |                        |       |                          |
|---------------|------------------------|------------------------|------------------------|------------------------|-------|--------------------------|
|               | 12.0 $\mu$ s<br>(23.3) | 54.7 $\mu$ s<br>(46.8) | 160 $\mu$ s<br>(29.9)  | n.a.                   | 1.051 | 77K                      |
| <b>4(1:1)</b> | 36.9 $\mu$ s<br>(22.2) | 110 $\mu$ s<br>(47.3)  | 380 $\mu$ s<br>(30.6)  | n.a.                   | 1.059 | 77K                      |
| <b>5(1:1)</b> | 127ps<br>(8.96)        | 982ps<br>(64.2)        | 2.25ns<br>(26.8)       | n.a.                   | 0.993 | 293K, short<br>lifetimes |
|               | 199ns<br>(18.3)        | 1.39 $\mu$ s<br>(81.7) | n.a.                   | n.a.                   | 1.056 | 293K, long<br>lifetimes  |
|               | 38.3 $\mu$ s<br>(25.4) | 130 $\mu$ s<br>(39.5)  | 380 $\mu$ s<br>(35.1)  | n.a.                   | 1.012 | 77K                      |
| <b>6(1:1)</b> | 294ns<br>(20.1)        | 55.8 $\mu$ s<br>(49.6) | 110 $\mu$ s<br>(30.3)  | n.a.                   | 1.036 | 77K                      |
| <b>7(1:1)</b> | 158ps<br>(14.0)        | 942ps<br>(28.0)        | 3.42ns<br>(58.0)       | n.a.                   | 1.049 | 293K, short<br>lifetimes |
|               | 292ns<br>(4.59)        | 1.47 $\mu$ s<br>(26.0) | 5.09 $\mu$ s<br>(69.4) | n.a.                   | 1.006 | 293K, long<br>lifetimes  |
|               | 529ps<br>(46.5)        | 1.05ns<br>(45.2)       | 4.00ns<br>(8.27)       | n.a.                   | 0.994 | 77K, short<br>lifetimes  |
|               | 9.99 $\mu$ s<br>(25.1) | 44.5 $\mu$ s<br>(38.4) | 130 $\mu$ s<br>(36.6)  | n.a.                   | 1.059 | 77K, long<br>lifetimes   |
| <b>8(1:1)</b> | 23.4 $\mu$ s<br>(13.4) | 96.3 $\mu$ s<br>(34.1) | 310 $\mu$ s<br>(52.4)  | n.a.                   | 0.991 | 77K                      |
| <b>1(2:3)</b> | 205ns<br>(10.6)        | 896ns<br>(35.8)        | 3.23 $\mu$ s<br>(53.5) | n.a.                   | 1.010 | 293K                     |
|               | 7.88 $\mu$ s<br>(23.3) | 46.1 $\mu$ s<br>(38.4) | 190 $\mu$ s<br>(38.3)  | n.a.                   | 1.049 | 77K                      |
| <b>2(2:3)</b> | 584ns<br>(55.1)        | 3.38 $\mu$ s<br>(28.2) | 14.6 $\mu$ s<br>(16.7) | n.a.                   | 1.052 | 293K                     |
|               | 144ps<br>(21.6)        | 705ps<br>(41.6)        | 3.18ns<br>(36.7)       | n.a.                   | 1.038 | 77K, short<br>lifetimes  |
|               | 27.3 $\mu$ s<br>(4.31) | 140 $\mu$ s<br>(43.9)  | 480 $\mu$ s<br>(51.8)  | n.a.                   | 1.072 | 77K, long<br>lifetimes   |
| <b>3(2:3)</b> | 51.0ns<br>(5.50)       | 622ns<br>(12.9)        | 2.89 $\mu$ s<br>(30.9) | 9.81 $\mu$ s<br>(50.7) | 1.077 | 293K                     |
|               | 656ps<br>(46.0)        | 1.61ns<br>(31.3)       | 5.61ns<br>(22.7)       | n.a.                   | 1.007 | 77K, short<br>lifetimes  |
|               | 70.9 $\mu$ s<br>(42.9) | 200 $\mu$ s<br>(57.1)  | n.a.                   | n.a.                   | 1.038 | 77K, long<br>lifetimes   |

|               |                  |                 |                  |                  |       |      |
|---------------|------------------|-----------------|------------------|------------------|-------|------|
| <b>4(2:3)</b> | <100ps<br>(5.94) | 612ps<br>(16.2) | 2.24ns<br>(41.6) | 6.15ns<br>(36.3) | 1.075 | 293K |
|---------------|------------------|-----------------|------------------|------------------|-------|------|

---

|               |                   |                  |                  |                  |       |                          |
|---------------|-------------------|------------------|------------------|------------------|-------|--------------------------|
|               | 487ps<br>(20.3)   | 1.61ns<br>(39.3) | 5.25ns<br>(40.4) | n.a.             | 1.040 | 77K, short<br>lifetimes  |
|               | 190μs<br>(9.86)   | 1.10ms<br>(11.4) | 10.0ms<br>(78.7) | n.a.             | 1.003 | 77K, long<br>lifetimes   |
| <b>5(2:3)</b> | <100ps<br>(15.2)  | 324ps<br>(16.6)  | 1.30ns<br>(30.2) | 4.76ns<br>(38.1) | 0.997 | 293K, short<br>lifetimes |
|               | 19.0 ns<br>(12.5) | 285ns<br>(26.1)  | 1.57μs<br>(61.4) | n.a.             | 1.044 | 293K, long<br>lifetimes  |
|               | 226ps<br>(11.6)   | 1.00ns<br>(49.4) | 3.96ns<br>(39.0) | n.a.             | 1.079 | 77K                      |
|               | 129ps<br>(6.42)   | 1.01ns<br>(21.3) | 4.62ns<br>(72.3) | n.a.             | 0.993 | 293K, short<br>lifetimes |
| <b>6(2:3)</b> | 561ns<br>(24.6)   | 3.13μs<br>(75.4) | n.a.             | n.a.             | 1.046 | 293K, long<br>lifetimes  |
|               | 12.9μs<br>(17.9)  | 89.8μs<br>(31.9) | 280μs<br>(50.1)  | n.a.             | 1.053 | 77K                      |
| <b>7(2:3)</b> | 131ps<br>(14.1)   | 643ps<br>(17.8)  | 2.20ns<br>(32.1) | 7.33ns<br>(36.0) | 1.068 | 293K, short<br>lifetimes |
|               | 121ns<br>(2.80)   | 441ns<br>(16.6)  | 1.56μs<br>(38.7) | 10.6μs<br>(41.9) | 1.082 | 293K, long<br>lifetimes  |
|               | 560ps<br>(30.9)   | 1.81ns<br>(38.9) | 5.64ns<br>(30.2) | n.a.             | 1.069 | 77K, short<br>lifetimes  |
|               | 5.92μs<br>(36.6)  | 38.9μs<br>(23.6) | 130μs<br>(22.2)  | 490μs<br>(17.7)  | 1.037 | 77K, long<br>lifetimes   |
|               | <100ps<br>(14.7)  | 611ps<br>(24.5)  | 1.69ns<br>(34.8) | 6.33ns<br>(26.0) | 1.083 | 293K, short<br>lifetimes |
|               | 519ns<br>(13.5)   | 2.74μs<br>(28.1) | 17.5μs<br>(58.4) | n.a.             | 1.021 | 293K, long<br>lifetimes  |
| <b>8(2:3)</b> | 469ps<br>(23.2)   | 1.90ns<br>(39.6) | 6.00ns<br>(37.2) | n.a.             | 1.022 | 77K, short<br>lifetimes  |
|               | 93.9μs<br>(19.7)  | 240μs<br>(58.2)  | 580μs<br>(22.0)  | n.a.             | 1.062 | 77K, long<br>lifetimes   |
| <b>1(1:2)</b> | 6.25μs<br>(2.42)  | 28.0μs<br>(74.9) | 82.3μs<br>(22.7) | n.a.             | 1.012 | 77K                      |
| <b>2(1:2)</b> | 59.6μs<br>(16.2)  | 160μs<br>(64.2)  | 430μs<br>(19.6)  | n.a.             | 1.045 | 77K                      |
| <b>3(1:2)</b> | 65.4μs<br>(27.3)  | 140μs<br>(53.6)  | 390μs<br>(19.0)  | n.a.             |       |                          |
| <b>4(1:2)</b> | 17.1μs<br>(19.9)  | 68.1μs<br>(50.7) | 290μs<br>(29.5)  |                  |       |                          |

|  |      |       |     |
|--|------|-------|-----|
|  | n.a. | 1.013 | 77K |
|  | n.a. | 1.063 | 77K |

|               |                        |                        |                        |      |       |      |
|---------------|------------------------|------------------------|------------------------|------|-------|------|
| <b>5(1:2)</b> | 83.5 $\mu$ s<br>(19.7) | 230 $\mu$ s<br>(57.9)  | 610 $\mu$ s<br>(22.5)  | n.a. | 1.021 | 77K  |
| <b>6(1:2)</b> | 19.2 $\mu$ s<br>(4.59) | 140 $\mu$ s<br>(44.8)  | 380 $\mu$ s<br>(50.6)  | n.a. | 1.035 | 77K  |
| <b>7(1:2)</b> | 254ns<br>(12.0)        | 1.08 $\mu$ s<br>(43.3) | 4.45 $\mu$ s<br>(44.7) | n.a. | 1.031 | 293K |
|               | 13.5 $\mu$ s<br>(20.8) | 74.7 $\mu$ s<br>(34.2) | 270 $\mu$ s<br>(45.0)  | n.a. | 1.078 | 77K  |
| <b>8(1:2)</b> | 82.1 $\mu$ s<br>(16.5) | 200 $\mu$ s<br>(53.4)  | 480 $\mu$ s<br>(30.2)  | n.a. | 1.008 | 77K  |

<sup>a</sup>Some percentage totals may not be equal to 100%, due to rounding error.

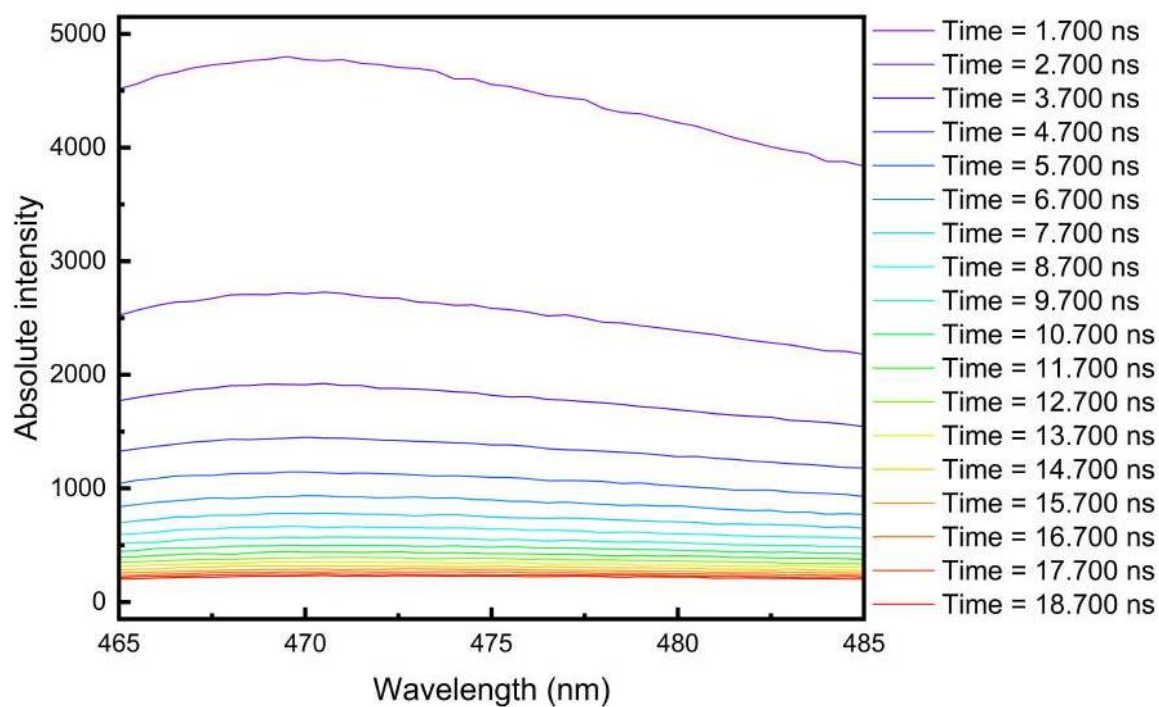

**Figure S173.** Absolute time-resolved emission spectra of **5(1:1)** at 293K.  $\lambda_{\text{ex}} = 378\text{nm}$ .



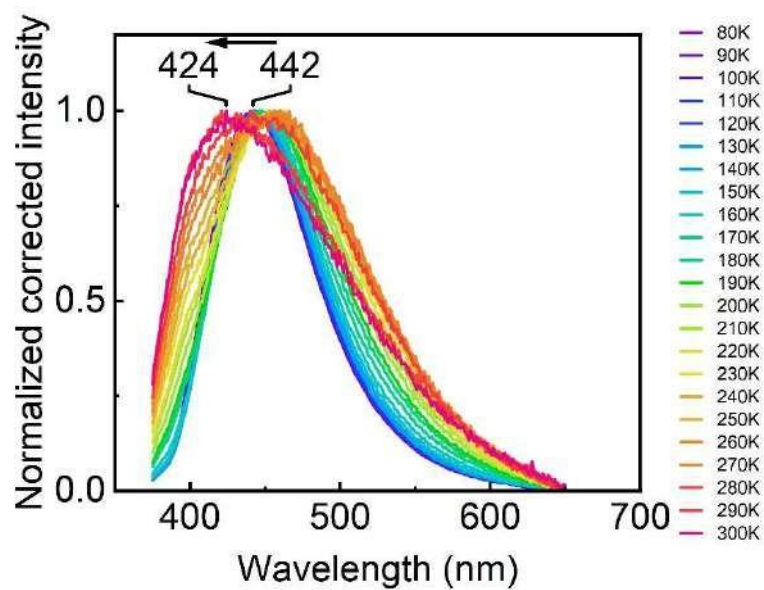

**Figure S174.** Normalized emission spectra of **5(1:1)** dependent on the temperature.

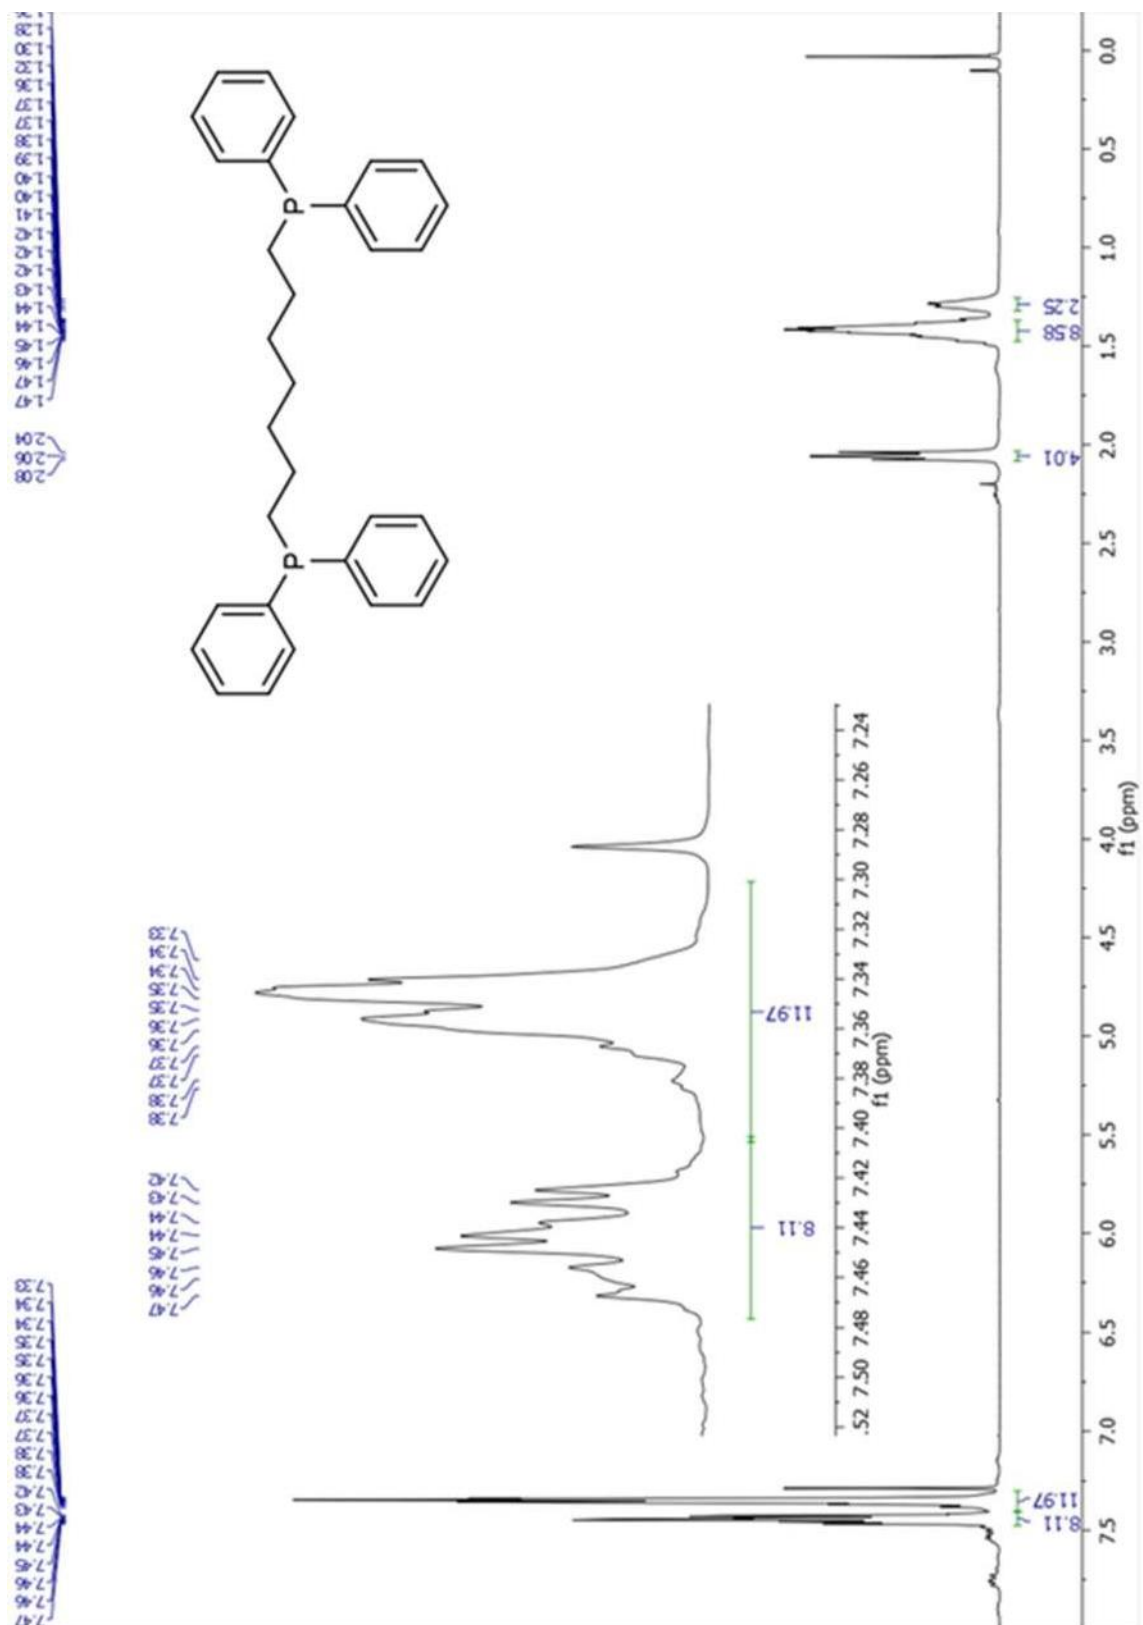

**Figure S175.** 400 MHz <sup>1</sup>H NMR spectrum of **L7** in CDCl<sub>3</sub>.

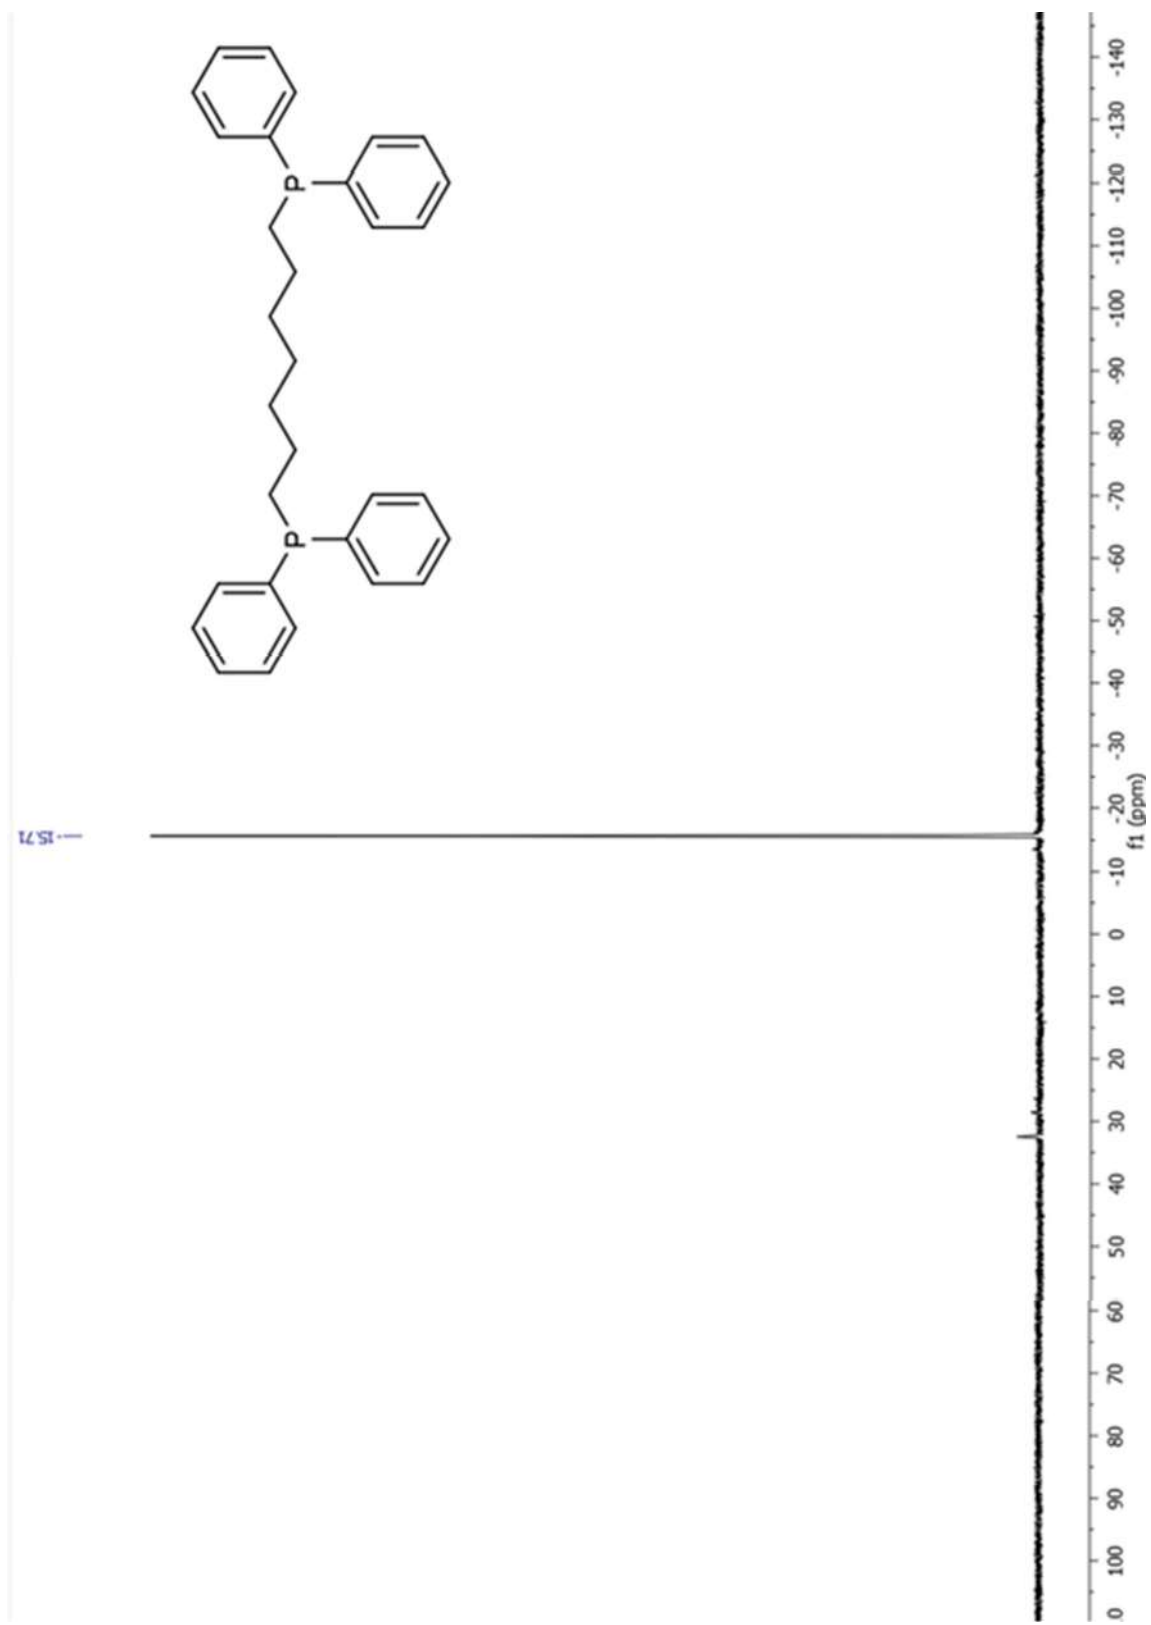

**Figure S176.** 162 MHz  $^{31}\text{P}$  NMR spectrum of **L7** in  $\text{CDCl}_3$ .

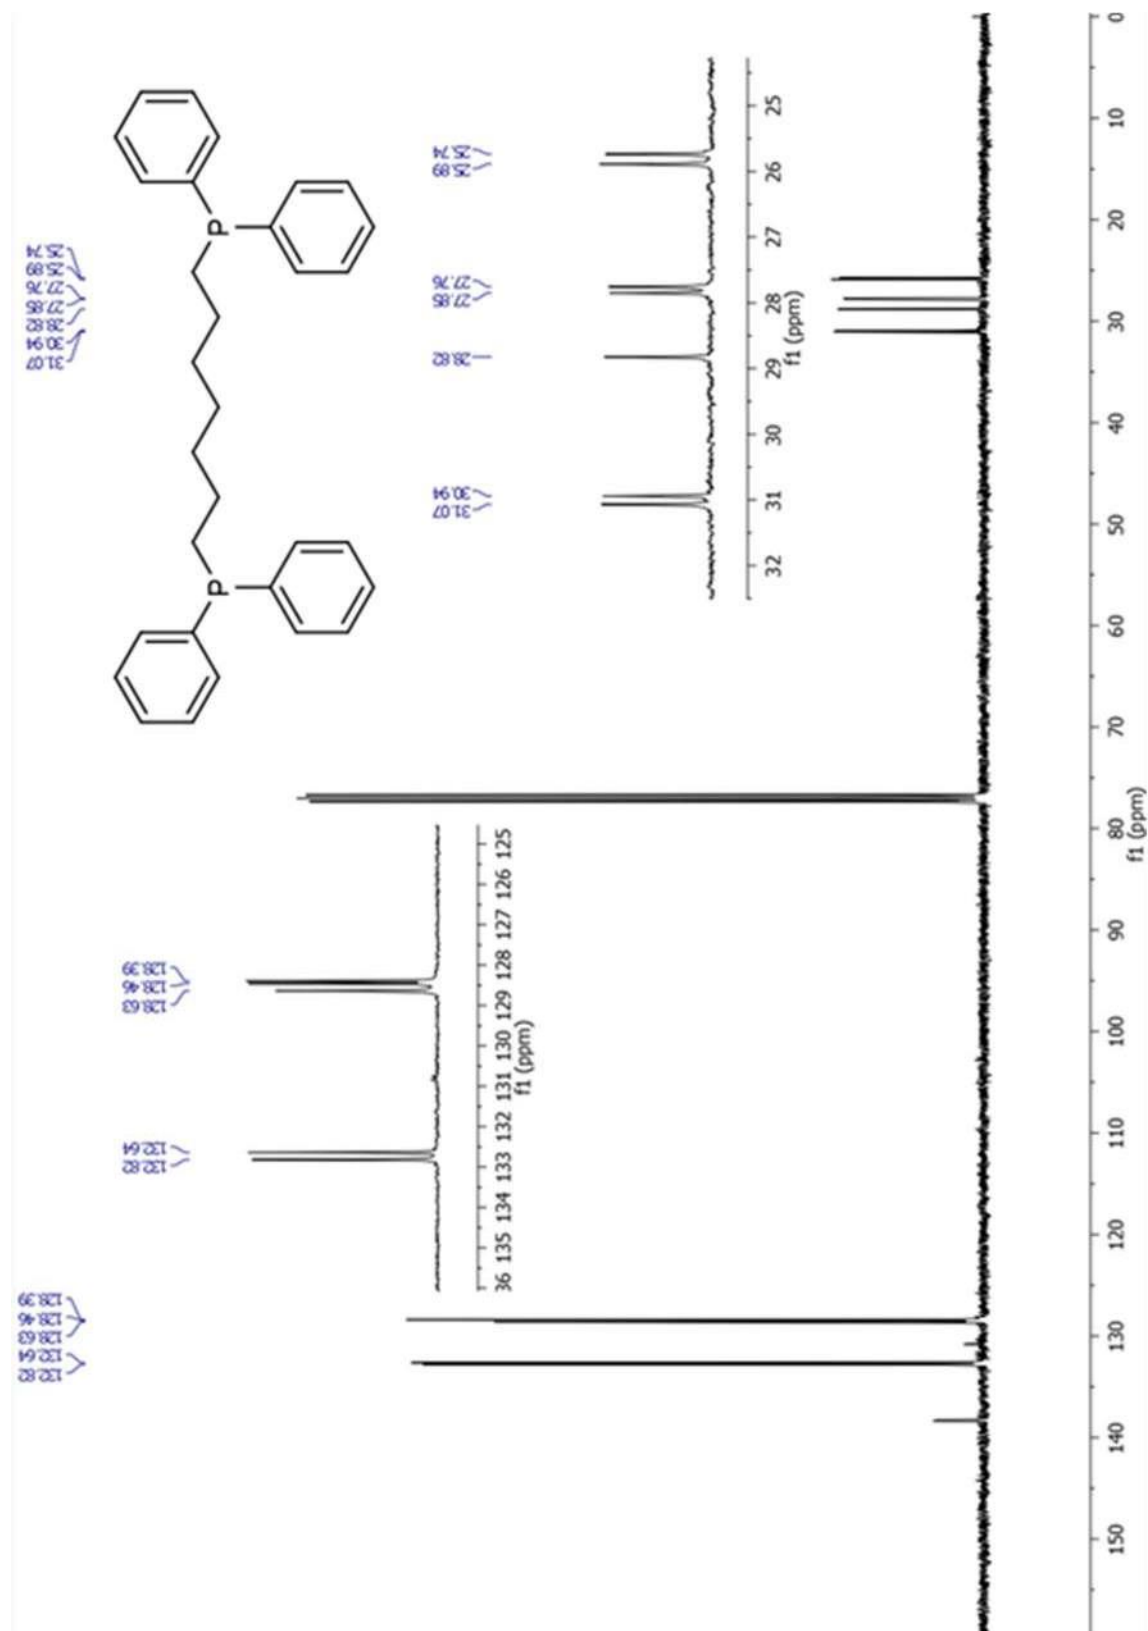

**Figure S177.** 100 MHz  $^{13}\text{C}$  NMR spectrum of **L7** in  $\text{CDCl}_3$ .

## REFERENCES

- (1) Marsich, N.; Nardin, G.; Randaccio, L. Tetranuclear Copper(I) Complex. Crystal and Molecular Structure of the 2:1 Derivative of Copper(I) Iodide and Bis(Diphenylphosphino)Methane. *J Am Chem Soc* **1973**, 95 (12), 4053–4054. <https://doi.org/10.1021/ja00793a040>.
- (2) Camus, A.; Nardin, G.; Randaccio, L. Structure Determination of the 2:1 Derivatives of Copper(I) Bromide and Iodide with Bis(Diphenylphosphino)Methane. A Simple Structural Scheme for the Formation of (CuX)<sub>n</sub>L<sub>m</sub> Species. *Inorganica Chim Acta* **1975**, 12 (1), 23–32. [https://doi.org/10.1016/S0020-1693\(00\)89831-X](https://doi.org/10.1016/S0020-1693(00)89831-X).
- (3) Benito, Q.; Le Goff, X. F.; Nocton, G.; Fargues, A.; Garcia, A.; Berhault, A.; Kahlal, S.; Saillard, J.-Y.; Martineau, C.; Trébosc, J.; Gacoin, T.; Boilot, J.-P.; Perruchas, S. Geometry Flexibility of Copper Iodide Clusters: Variability in Luminescence Thermochromism. *Inorg Chem* **2015**, 54 (9), 4483–4494. <https://doi.org/10.1021/acs.inorgchem.5b00321>.
- (4) Qian, H.; Chen, Y.; Ren, Y.; Zhang, Y.; Lang, J. Solvothermal Synthesis and Crystal Structure of Cu<sub>2</sub> (μ-Dppb)<sub>2</sub> (μ-I)<sub>2</sub> (Dppb = 1,4-Di(Diphenylphosphine)Butane). *Journal of Suzhou University (Natural Science Edition)* **2008**, 24 (4), 83–86.
- (5) Zhang, X.; Song, L.; Hong, M.; Shi, H.; Xu, K.; Lin, Q.; Zhao, Y.; Tian, Y.; Sun, J.; Shu, K.; Chai, W. Luminescent Dinuclear Copper(I) Halide Complexes Double Bridged by Diphosphine Ligands: Synthesis, Structure Characterization, Properties and TD-DFT Calculations. *Polyhedron* **2014**, 81, 687–694. <https://doi.org/10.1016/j.poly.2014.07.034>.
- (6) Effendy; Di Nicola, C.; Fianchini, M.; Pettinari, C.; Skelton, B. W.; Somers, N.; White, A. H. The Structural Definition of Adducts of Stoichiometry MX:Dppx (1:1) M=CuI, AgI, X=simple Anion, Dppx=Ph<sub>2</sub>P(CH<sub>2</sub>)XPPH<sub>2</sub>, X=3–6. *Inorganica Chim Acta* **2005**, 358 (3), 763–795. <https://doi.org/10.1016/j.ica.2004.09.047>.
- (7) Nardin, G.; Randaccio, L.; Zangrando, E. Stereochemistry of Copper(I) Complexes. Part II. The Molecular Structure of the 3 : 2 Reaction Product between Copper Iodide and Bis(Diphenylphosphino)Methane: Di-μ-[Bis(Diphenylphosphino)Methane]-μ-Iodo-Di-M3-Iodo-Triangulo-Tricopper(I)–0.5 Dichloromethane. *Journal of the Chemical Society, Dalton Transactions* **1975**, No. 23, 2566. <https://doi.org/10.1039/dt9750002566>.
- (8) Aslanidis, P.; Cox, P. J.; Divanidis, S.; Tsiplis, A. C. Copper(I) Halide Complexes with 1,3-Propanebis(Diphenylphosphine) and Heterocyclic Thione Ligands: Crystal and Electronic Structures (DFT) of [CuCl(PymtH)(Dppp)], [CuBr(PymtH)(Dppp)], and [Cu(μ-I)(Dppp)]<sub>2</sub>. *Inorg Chem* **2002**, 41 (25), 6875–6886. <https://doi.org/10.1021/ic025896i>.
- (9) Effendy; di Nicola, C.; Pettinari, C.; Pizzabiocca, A.; Skelton, B. W.; Somers, N.; White, A. H. The Structural Definition of Adducts of Stoichiometry MX:Dpex (2:3)(<sup>∞</sup>), M=CuI, AgI, X=simple Anion, Dpex=Ph<sub>2</sub>E(CH<sub>2</sub>)XEPh<sub>2</sub>, E=P, As. *Inorganica Chim Acta* **2006**, 359 (1), 64–80. <https://doi.org/10.1016/j.ica.2005.06.012>.
- (10) Comba, P.; Katsichtis, C.; Nuber, B.; Pritzkow, H. Solid-State and Solution Structural Properties of Copper(I) Compounds with Bidentate Phosphane Ligands. *Eur J Inorg Chem* **1999**, 1999 (5), 777–783. [https://doi.org/10.1002/\(SICI\)1099-0682\(199905\)1999:5<777::AID-EJIC777>3.0.CO;2-A](https://doi.org/10.1002/(SICI)1099-0682(199905)1999:5<777::AID-EJIC777>3.0.CO;2-A).
